# Supplementary material for: Complex Trait Analysis of Human Gut Microbiome-Active Traits in Sorghum bicolor: a new category of human health traits in food crops
Source: Research Square preprint supplement (doi:10.21203/rs.3.rs-1490527/v1), 2022-03-30
Supplement: Supplementary file 1 [file 8779448722b6bf1bcc540452.xlsx]

## Sheet: Dataset S1_Genus_Table
id	accessionID	Sample	Bifidobacteriaceae_Bifidobacterium	Coriobacteriaceae_Collinsella	Eggerthellaceae_Adlercreutzia	Eggerthellaceae_Eggerthella	CoriobacterialesIncertaeSedis_uncultured	uncultured_unculturedbacterium	Christensenellaceae_ChristensenellaceaeR-7group	Enterobacteriaceae_Escherichia-Shigella	Desulfovibrionaceae_Desulfovibrio	Desulfovibrionaceae_Bilophila	Desulfovibrionaceae_uncultured	Desulfovibrionaceae_Mailhella	Burkholderiaceae_Parasutterella	Burkholderiaceae_Sutterella	Ruminococcaceae_Eubacteriumcoprostanoligenesgroup	Ruminococcaceae_Ruminiclostridium5	Ruminococcaceae_Ruminococcus2	Ruminococcaceae_Angelakisella	Ruminococcaceae_Negativibacillus	Ruminococcaceae_uncultured	Ruminococcaceae_Ruminiclostridium6	Ruminococcaceae_Ruminococcus1	Ruminococcaceae_Subdoligranulum	Ruminococcaceae_Faecalibacterium	Ruminococcaceae_Butyricicoccus	Ruminococcaceae_RuminococcaceaeUCG-010	Ruminococcaceae_RuminococcaceaeUCG-005	Ruminococcaceae_RuminococcaceaeUCG-002	Ruminococcaceae_Oscillibacter	Ruminococcaceae_RuminococcaceaeUCG-003	Ruminococcaceae_Flavonifractor	Ruminococcaceae_Ruminiclostridium9	Ruminococcaceae_RuminococcaceaeNK4A214group	FamilyXIII_Eubacteriumbrachygroup	FamilyXIII_FamilyXIIIAD3011group	FamilyXI_Peptoniphilus	FamilyXI_Anaerococcus	Veillonellaceae_Veillonella	Veillonellaceae_Dialister	Ruminococcaceae_RuminococcaceaeUCG-013	Prevotellaceae_Prevotella2	Prevotellaceae_Paraprevotella	Barnesiellaceae_Barnesiella	Rikenellaceae_Alistipes	Tannerellaceae_Parabacteroides	Bacteroidaceae_Bacteroides	Marinifilaceae_Odoribacter
8759-3	8759	8759-3	0	0	0	0	0	0	0.90309	2.5302	0	1.07918	1.44716	0	2.56703	1.38021	1.11394	0	1.43136	0	0	0	0	0	1.27875	1.50515	1.51851	0	0	1.17609	0	0	0	0	0	0	0	0	0	0	0	0	1.11394	2.55751	1.07918	2.1271	2.69897	3.48458	1.43136
8759-1	8759	8759-1	0.778151	0.30103	0	0	0	0	1	3.11461	0.69897	1.30103	1.36173	0	2.25768	0.90309	1.04139	0	1.27875	0	0	0	0.477121	0	1.38021	0	1.74036	0	0	0.778151	0	0	0	0	0	0	0	0	0	0	0	0.477121	0	2.12057	1	1.96848	2.6637	3.35507	1.04139
8759-2	8759	8759-2	0.778151	0.69897	0	0	0	0.477121	0	3.09307	0	1.25527	1.17609	0.477121	2.33646	1.20412	1	0	1.41497	0	0	0	0	0	1.17609	0.60206	1.8451	0	0	1.11394	0	0	0	0	0	0	0	0	0	0	0	0	0.90309	2.24304	0.60206	1.89209	2.58659	3.39217	1.34242
8760-2	8760	8760-2	0.954243	0.778151	0	0	0	0	0	3.1329	0	1.23045	1.11394	0	2.29003	1.27875	1.11394	0	1.41497	0	0	0	0	0	1.04139	1	1.64345	0	0	0	0	0	0	0	0	0	0	0	0	0	0.477121	0.845098	0	2.0607	0	1.716	2.4609	3.34537	0.845098
8760-1	8760	8760-1	1	1	0	0	0	0	0.90309	3.26741	0	1	1.07918	0.60206	2.25042	1.07918	0	0	1.39794	0	0	0	0	0	1.49136	0	1.95904	0	0	0.60206	0	0	0	0	0	0	0	0	0	0	0.477121	0	0.60206	2.24055	0	1.70757	2.55509	3.41044	0.954243
8760-3	8760	8760-3	1.17609	0.69897	0	0	0	0	0.90309	3.09726	0.954243	1.44716	0	0	2.33244	1.14613	0.778151	0	1.49136	0	0	0	0	0	1.30103	1.11394	0	0	0	1.14613	0	0	0	0	0	0	0	0	0	0	0	1	0.69897	2.22789	0	1.41497	2.42975	3.36192	1.32222
8764-3	8764	8764-3	0	0	0	0	0	0	1	2.8014	0	1.20412	1.14613	0.845098	2.70927	1.65321	0.69897	0	1.27875	0	0	0	0	0	1.27875	1.07918	1.44716	0	0	1.36173	0	0	0	0.60206	0	0	0	0	0	0	0.30103	0	0.845098	2.44091	1.14613	2.26245	2.89265	3.64375	1.23045
8764-1	8764	8764-1	0	0	0	0	0	0	0.845098	2.82802	0.30103	1.20412	1.23045	0.30103	2.56348	1.41497	0.69897	0	1.39794	0	0	0	0	0	0.845098	0.69897	0	0.60206	0	1	0	0	0	0	0	0	0	0	0	0	0.60206	0.477121	1.11394	2.39967	0.954243	2.02531	2.88818	3.5534	1.27875
8764-2	8764	8764-2	1.07918	0.778151	0	0	0	0	1.14613	3.14768	0	1.36173	1.07918	0	2.2014	1.17609	0.90309	0	1.51851	0	0	0	0	0	1.39794	0	1.75587	0	0	1	0	0	0	0	0	0	0	0	0	0	0.477121	1	0	2.08991	0.477121	1.81291	2.60853	3.36361	1.23045
8765-1	8765	8765-1	1.11394	0.60206	0	0	0	0	0	3.15746	0	1.17609	0.90309	0.60206	2.35025	1.32222	0.69897	0	1.44716	0	0	0	0	0	1.4624	0	1.716	0	0	0	0	0	0	0	0	0	0	0	0	0	0.778151	0	0.477121	2.35793	0	1.83251	2.63043	3.40518	1.27875
8765-2	8765	8765-2	0.477121	0	0	0	0	0	0	3.18156	0	1.04139	0	0	2.16732	1.34242	0	0	1.14613	0	0	0	0	0	1.14613	0	1.90849	0	0	0	0	0	0	0	0	0	0	0	0	0.60206	0.69897	0	0	2.24797	0.845098	1.87506	2.66839	3.45286	1.11394
8765-3	8765	8765-3	0	0	0	0	0	0	0.778151	2.8202	0.60206	1.27875	1.32222	1.14613	2.70672	1.70757	0	0	1.20412	0	0	0	0	0	1.04139	0	1.75587	0	0	0	0	0	0.69897	0	0	0	0	0	0	0	0.477121	0	1.14613	2.33646	1.27875	2.18752	2.75358	3.65543	1.4624
8769-1	8769	8769-1	0.477121	0.477121	0	0	0	0	0	3.14457	0	1.27875	0.90309	0.30103	2.29447	1	0.778151	0	1.47712	0	0	0	0	0	1.07918	1	1.81291	0	0	0.845098	0	0	0	0	0	0	0	0	0	0	0.845098	0	0.954243	2.26951	0.90309	1.8451	2.70329	3.41664	1.30103
8769-2	8769	8769-2	0.30103	0.90309	0	0	0	0	0.477121	3.09482	0.845098	1.27875	1.17609	0	2.27875	1.17609	0.845098	0	1.4624	0	0	0	0	0	1.23045	0	1.51851	0	0	0	0	0	0	0	0	0	0	0	0	0	0	0.477121	0.60206	2.19312	0.477121	1.90849	2.549	3.34753	0.778151
8769-3	8769	8769-3	0	0.69897	0	0	0	0	0	2.94002	0	1.32222	0.90309	0	2.43136	1.75587	0.778151	0	1.17609	0	0	0	0	0	1.04139	0	1.34242	0	0	0.477121	0	0	0	0	0	0	0	0	0	0	0.90309	0.954243	1.14613	2.31806	0.90309	1.88081	2.65896	3.55035	1.25527
8771-2	8771	8771-2	0.845098	0.69897	0	0	0	0	0.954243	2.85612	0.477121	1.23045	0.778151	0.477121	2.37291	1.27875	1.07918	0	1.32222	0	0	0	0	0	1.17609	0.778151	2.11059	0.60206	0	0.90309	0	0	0	0	0	0	0	0	0	0	0	0.60206	0.69897	2.35411	1.14613	1.8451	2.83759	3.36624	1.38021
8771-3	8771	8771-3	0	0.477121	0	0	0	0	1.25527	2.98767	0	1.07918	1.38021	0.30103	2.40993	1.11394	1.07918	0	1.30103	0	0	0	0	0	0.954243	0	2.08991	0	0	1.14613	0	0	0	0	0	0	0	0	0	0	0	0	0	2.30963	0.477121	2.09342	2.64147	3.42455	1.50515
8771-1	8771	8771-1	0.954243	0	0	0	0	0	1.07918	2.97635	0	1.27875	1.07918	0	2.32222	1.25527	1	0.60206	1.57978	0	0	0	0	0	1.47712	0	1.92942	0.69897	0	0	0	0	0	0	0	0	0	0	0	0	0	0	0.90309	2.32838	1.04139	1.90309	2.55023	3.30664	1.17609
8772-1	8772	8772-1	1.23045	1.11394	0	0	0	0	1.32222	3.06893	0.778151	1.53148	0.69897	0	2.22272	1.14613	0	0	1.38021	0	0	0	0	0	1.43136	0	1.91381	0	0	0.60206	0	0	0	0	0	0	0	0	0	0	0.778151	1	0	2.29003	0.477121	1.95904	2.70157	3.35813	1.30103
8772-2	8772	8772-2	0	0.845098	0	0	0	0	1.20412	2.63347	0.845098	1.14613	1.07918	0	2.56229	1.38021	0.778151	0	1.44716	0	0	0	0	0	1.27875	2.00432	1.41497	0	0	1.61278	0	0	0	0	0.60206	0	0	0	0	0	1.11394	0.954243	0.954243	2.62014	1.34242	2.22531	2.78533	3.49638	1.27875
8772-3	8772	8772-3	0.954243	0.90309	0	0	0	0	0.30103	3.25188	0	1.38021	1.04139	0	2.39445	1.11394	0.90309	0	1.5563	0	0	0	0	0	1.36173	0	1.77085	0	0	0.954243	0	0	0	0.477121	0	0	0	0	0	0	0.69897	0	0.778151	2.29667	0.90309	1.75587	2.59879	3.49624	1.25527
8773-1	8773	8773-1	1.14613	1.17609	0	0	0	0	1.27875	3.24105	0	1.41497	1.20412	0.477121	2.14301	1.04139	0	0	1.25527	0	0	0	0	0	1.14613	0	2.03342	0	0	1.04139	0	0	0	0	0	0	0	0	0	0	0.60206	0	0	2.26482	0.60206	1.98677	2.5563	3.43632	1
8773-2	8773	8773-2	1.07918	0.845098	0	0	0	0	1.32222	3.16227	0	1.34242	1.32222	0	2.44716	0.90309	0.477121	0	1.34242	0	0	0	0	0	1.47712	0	2.28103	0	0	0	0	0	0	0	0	0	0	0	0	0	0.60206	0	0	2.28103	0.778151	2.06819	2.39794	3.43425	1.43136
8773-3	8773	8773-3	0	0.69897	0	0	0.30103	0	1.17609	2.83315	0.477121	1.20412	1.04139	0	2.72916	1.53148	1.07918	0	1.20412	0	0	0	0.30103	0	1.11394	0	1.6721	0	0	1.27875	0	0	0	0	0.778151	0	0	0	0	0	0.954243	0.954243	1.07918	2.49415	1.14613	2.33244	2.79099	3.66332	1.5682
8774-2	8774	8774-2	0.69897	0.778151	0.845098	0	0	0	0.60206	3.05729	0.30103	1.14613	0.954243	0	2.18184	0	0	0	1.5563	0	0	0	0	0	0	0	1.86923	0	0	0	0	0	0	0	0	0	0	0	0	0	0	0	0	2.08991	0.477121	1.81291	2.5563	3.37051	1.20412
8774-1	8774	8774-1	1.07918	1	0	0	0	0	1.27875	3.21854	0	1.14613	1	0.477121	2.29003	1.11394	0.778151	0	1.30103	0	0	0	0	0	1.30103	0	1.70757	0	0	0	0	0	0	0	0	0	0	0	0	0	0	0	0	2.02119	1.07918	1.78533	2.65031	3.27254	0.954243
8774-3	8774	8774-3	0.778151	0.954243	0	0	0	0	1.07918	2.96095	0.954243	1.25527	1.04139	0.30103	2.13672	0.845098	1.11394	0	1.43136	0	0	0	0	0	1.32222	0.845098	2.1271	0	0	0.69897	0	0	0	0	0	0	0	0	0	0	0	0	0.845098	2.24304	0.69897	1.85733	2.49415	3.31555	1.07918
8775-3	8775	8775-3	0	0.30103	0	0	0	0	1.04139	2.85794	0.90309	1.25527	1.25527	1.17609	2.70757	1.82607	0.778151	0	0	0	0	0	0	0	1.07918	1.20412	0	0	0	1	0	0	0	0	0	0	0	0	0	0	0.778151	1.04139	0	2.43775	1.14613	2.37291	2.52763	3.62252	1.47712
8775-2	8775	8775-2	1	0.477121	0	0	0	0	0	3.26834	0	1.39794	0.90309	0	2.4014	1.27875	1.17609	0	1.64345	0	0	0	0	0	1.34242	0.477121	1.89763	0	0	0.90309	0	0	0	0	0	0	0	0	0	0	1.11394	0.69897	0.954243	2.31175	0	1.79239	2.64836	3.4813	0.845098
8775-1	8775	8775-1	0.954243	0.845098	0	0	0	0	0	3.33062	0	1.32222	1.14613	0	2.1038	1.11394	0.778151	0	1.36173	0	0	0	0	0	0.60206	0	1.64345	0	0	0	0	0	0	0	0	0	0	0	0	0	0	0	0.954243	2.10721	0.954243	1.96379	2.63548	3.46642	1.17609
8777-2	8777	8777-2	0.90309	0.60206	0.30103	0	0	0.845098	1.07918	3.14922	0.90309	1.39794	1	1	2.46538	1.25527	0.60206	0.60206	1.27875	0	0	0	0	0	1.30103	0	2.21484	0	0	0	0.60206	0	0	0	0	0	0	0	0	0	0.778151	0	0	2.3075	1.32222	2.09342	2.39967	3.44623	1.23045
8777-1	8777	8777-1	0.954243	0	0	0	0	0	0	3.33806	0	1.38021	0.778151	0	2.48996	1.36173	0.69897	0	1.61278	0	0	0	0	0	1.32222	0	2.0086	0	0	0.778151	0	0	0	0	0	0	0	0	0	0	0	0	0.845098	2.23553	1.04139	1.83251	2.55023	3.4853	1.11394
8777-3	8777	8777-3	0	0.845098	0	0.30103	0	0	1.63347	2.90091	0.778151	1.38021	1.07918	0.778151	2.26717	0.60206	1.20412	0.778151	1.44716	0	0	0	1.32222	0	1.4624	2.51587	1.74036	0	0	1.90849	0	1.17609	0.90309	1.51851	0	0	0	0	0	0	0.90309	1.23045	1.14613	2.29667	1.32222	2.04922	2.6464	3.38274	1.11394
8779-3	8779	8779-3	0	0.69897	0	0	0	0	1.17609	2.47712	0.845098	1.17609	1.20412	0	2.66276	1.65321	0	0	0	0.69897	0	0	0	0.69897	1.30103	2.17026	1.57978	0	0	1.59106	0	0	0	0	0	0	0	0	0	0	0.845098	0	1.04139	2.64933	1.41497	2.09691	2.82737	3.56996	1.39794
8779-1	8779	8779-1	0.69897	0.60206	0	0	0	0	1.36173	3.02366	0.60206	1.41497	0.954243	0	2.45179	1.39794	0.954243	0	1.20412	0	0	0	0	0	1.23045	1.83251	1.96848	0	0	1	0	0	0	0	0.778151	0	0	0	0	0	0.477121	0	0.954243	2.44248	1.07918	2.1038	2.82802	3.44747	1.20412
8779-2	8779	8779-2	0.69897	1.11394	0.778151	0	0	0	1.23045	3.09272	0	1.23045	0.477121	0	2.17026	1.11394	0	0.778151	1.54407	0	0.778151	0	0	0	1.54407	1.39794	1.86332	0	0	1.27875	0	0	0	0	0	0	0	0	0	0	0	0	1	2.26717	0.60206	1.8451	2.64542	3.34947	1.25527
8784-1	8784	8784-1	0.477121	0.778151	0	0	0	0	1.39794	2.84819	0.69897	1.36173	1.07918	0	2.36922	1.04139	0.778151	0	1.5682	0	0	0	0	0	1.20412	1.88649	1.8451	0	0	1.20412	0	0	0	0	0.845098	0	0	0	0	0	0	0.845098	0.69897	2.13033	1.17609	2.00432	2.5955	3.26834	1
8784-2	8784	8784-2	0.954243	1.25527	0	0.778151	0	0	1.32222	3.03543	0	1.34242	1.07918	0.477121	2.26717	1.20412	0.90309	0	1.63347	0	0	0	0	0	1.36173	1.59106	1.95904	0	0	1.30103	0	0	0	0	0	0	0	0	0	0	0.477121	0.69897	0.69897	2.2878	1.14613	1.83251	2.56229	3.34986	1.20412
8784-3	8784	8784-3	1.79934	1.86923	0	0	0.778151	0	1.64345	2.97405	1.5563	1.49136	1.14613	0	1.85733	1	2.14301	1.54407	2.74194	0	1.5682	0	0	0	2.41497	2.94201	0	0	1.23045	1.95904	0.845098	1.04139	0	0	0.845098	0.954243	1.30103	0	2.0607	0	2.31806	1.81291	0.845098	2.04922	0.778151	1.97313	2.35793	3.20058	1.30103
8785-1	8785	8785-1	0	0.778151	0	0	0	0	1.11394	2.62325	0.60206	1.23045	1.4624	0.845098	2.64836	1.39794	0.60206	0	1.07918	0	0	0	0	0	1.23045	2.34439	1.20412	0	0	1.5682	0	0	0	0	0.90309	0	0	0	0	0	0	0.60206	1.07918	2.47712	1.34242	2.31597	2.87852	3.50651	1.39794
8785-2	8785	8785-2	1	1.23045	0.845098	0	0	0	1.47712	3.02078	0	1.38021	1.20412	0.30103	2.35984	1.25527	1.11394	0	1.61278	0	0	0	0	0	1.5563	1.25527	1.89763	0	0	1.47712	0	0	0	0	0	0	0	0	0	0	0	0	0.778151	2.08991	0.778151	1.89209	2.62839	3.4101	1.11394
8785-3	8785	8785-3	0	0	0	0	0	0	1.43136	2.77743	0	1.14613	1.17609	0	2.49554	1.25527	1.07918	0	1.17609	0	0	1.30103	0	0	1.36173	2.82607	1.72428	0	0	1.82607	0	0	0	0	0	0	0	0	0	0	0	1.17609	1.17609	2.29447	0.954243	2.02531	2.73719	3.44091	1.47712
8786-2	8786	8786-2	1	1.14613	0	0	0	0.477121	1.36173	3.01662	0	1.07918	1.11394	0.477121	2.32634	1.41497	0.845098	0	1.27875	0	0	0	0	0	1.39794	1.07918	1.92428	0	0	1.17609	0	0	0	0	0	0	0	0	0	0	0	0.90309	0	2.37475	0	2.0086	2.5563	3.37803	1.14613
8786-3	8786	8786-3	0	0	0	0	0	0	1.07918	2.66464	0	1.11394	0	0.90309	2.63448	1.83885	0.845098	0	1.20412	0	0	0	0	0	1.17609	1.23045	1.51851	0	0	0.954243	0	0	0	0	0	0	0	0	0	0	0	0.778151	0	2.45332	0.778151	2.04532	2.77305	3.52724	1.17609
8786-1	8786	8786-1	1	0.954243	0	0	0	0	1	3.13098	0	1.17609	0.845098	0.477121	2.44871	1	0.90309	0	1.34242	0	0	0	0	0	1.36173	0.90309	2.02531	0	0	1	0	0	0	0	0	0	0	0	0	0	0	0	0.477121	2.29667	0.90309	2.04922	2.61595	3.3485	1.34242
8787-1	8787	8787-1	0.845098	0	0	0	0	0	0	2.82866	0	1.39794	1	0.90309	2.49136	1.07918	0.60206	0	1.20412	0.778151	0	0	1.04139	0	1.17609	2.38021	1.44716	0	0	1.5563	0.778151	0	0	0	0	0	0	0	0	0	0	0	1.23045	2.70757	1.17609	2.33846	2.8704	3.51468	1.23045
8787-2	8787	8787-2	0.90309	1.17609	1.11394	0	0	0.477121	1.36173	2.89098	0	1.44716	0.477121	0.60206	2.14613	0	0.954243	0	1.63347	0	0	0	0	0	1.39794	1.89209	1.74819	0	0	1.5682	0	0	0	0	0.90309	0	0	0.69897	0	0	0	0	0.60206	2.36361	1	1.8451	2.64933	3.28981	1.27875
8787-3	8787	8787-3	0	0	0	0	0	0	1.47712	2.56937	1	1.41497	1.23045	1.17609	2.65992	1.5682	0.90309	0	1.14613	0	0	1.34242	0	0	1.49136	2.51587	1.17609	0	0	1.89209	0	0	0	0	0	0	0	0	0	0	0	0	0.60206	2.66652	1	2.30963	2.87622	3.56738	1.32222
8788-1	8788	8788-1	0	0.30103	0	0	0	0	0	2.5955	0.69897	1.23045	0.778151	0.954243	2.64345	1.4624	0	0	1.04139	0	0	0	0	0	1.36173	0	1.25527	0	0	1.11394	0	1.04139	0	0.60206	0	0	0	0	0	0	0.69897	0	0.954243	2.63347	1.30103	2.13033	2.86864	3.5293	1.50515
8788-2	8788	8788-2	0.845098	1.11394	0	0	0	0	1.11394	3.16909	0	1.41497	1.23045	0.30103	2.43136	1.34242	0.30103	0	1.20412	0	0	0	0	0	1.51851	1.17609	1.77085	0	0	1.07918	0	0	0	0	0	0	0	0	0	0	0	0	0.845098	2.23805	0.90309	1.91381	2.69108	3.43457	1.30103
8788-3	8788	8788-3	0.845098	1.20412	0	0	0	0	1.14613	2.98498	0	1.17609	1.07918	0	2.19033	1.51851	0	0	1.63347	0	0	0	0	0	0.477121	0.60206	2.06819	0	0	1.07918	0	0	0	0	0	0	0	0	0	0	0.954243	0	0.778151	2.11394	0.60206	1.90309	2.55023	3.25382	0.778151
8789-2	8789	8789-2	0.90309	0.30103	0	0	0	0	1.36173	2.94596	0	1.38021	0.845098	0	2.38739	1.07918	1.04139	0.69897	1.60206	0	0	0	0	0	0.954243	1.4624	2.12385	0	0	1.36173	0	0	0	0	0	0	0	0	0	0	0.778151	0.845098	0.778151	2.4183	1.07918	1.9345	2.61909	3.30211	1.25527
8789-1	8789	8789-1	0.90309	1.11394	0	0	0	0	1.62325	3.0216	0.90309	1.41497	1.23045	0	2.46389	1.5563	0.954243	0	1.60206	0	0	0	0	0	1.07918	1.75587	1.96379	0	0	1.30103	0	0	0	0	1	0	0	0	0	0	0	0.69897	1	2.49136	1.11394	2.03743	2.67302	3.40192	1.23045
8789-3	8789	8789-3	0	1	0	0	0	0	1.11394	2.95617	0	1.04139	0	0	2.24304	0	0.954243	0	1.49136	0	0	0	0	0	1.49136	0	1.8451	0	0	0	0	0	0	0	0	0	0	0	0	0	1.04139	0.69897	0	2.1271	0.60206	1.78533	2.33244	3.27068	1.20412
8790-3	8790	8790-3	0	0.30103	0	0	0	0	1.11394	2.8055	0.60206	1.39794	1.07918	0	2.48996	1.23045	0.845098	0.90309	1.38021	0	0	0	0	0	1.20412	0	1.716	0	0	0.954243	0.60206	0	0	0	0	0	0	0	0	0	1.07918	0.778151	1.27875	2.27184	0.954243	2.32015	2.41162	3.68024	1.49136
8790-1	8790	8790-1	0.477121	0.778151	0	0	0	0	0.778151	3.33786	0.477121	1.36173	0.845098	0	2.33244	1.25527	1.11394	0	1.5563	0	0	0	0	0	1.57978	0	2.04139	0	0	0	0	0	0	0	0	0	0	0	0	0	0.90309	0.60206	0.90309	2.22531	0.954243	1.76343	2.56229	3.45697	1.43136
8790-2	8790	8790-2	0.954243	0.69897	0	0	0	0	0	3.19535	0	1.25527	1.30103	0	2.34635	1.36173	0.845098	0	1.36173	0	0	0	0	0.90309	1.51851	0	1.79239	0	0	0	0	0	0	0	0	0	0	0	0	0	0	0	0.845098	2.09342	0.90309	1.38021	2.48855	3.37383	1
8794-1	8794	8794-1	0.90309	0.30103	0	0	0	0	1.14613	2.95085	0	1.23045	0.954243	0	2.44091	1.07918	0.778151	0	1.14613	0	0	0	0	0	1.25527	1.25527	1.98227	0	0	1.17609	0	0	0	0	0	0	0	0	0	0	0	0.90309	0	2.42813	0.60206	2.0607	2.67578	3.35717	1.07918
8794-2	8794	8794-2	0.778151	0.30103	0	0	0	0	1.43136	3.09621	0.954243	1.34242	1.07918	0.60206	2.38202	1.11394	0	0	1.5563	0	0	0	0	0	1.11394	1.20412	2.17609	0	0	1.23045	0	0	0	0	0	0	0	0	0	0	0	1.07918	0	2.36736	0.90309	1.86332	2.67117	3.38328	1.14613
8794-3	8794	8794-3	0.954243	1.30103	0.954243	0	0	0	0	3.03583	0	1.25527	1.04139	0	2.32838	1.20412	0.477121	0	1.38021	0	0	0	0	0	1.50515	0	2.02938	0	0	0	0	0	0	0	0	0	0	0	0	0	0	0	0	2.17319	0.845098	2.04139	2.51983	3.32077	1.04139
8798-2	8798	8798-2	1.23045	0.90309	0	0	0	0	0	3.13925	0	1.36173	0.845098	0	2.35603	0.90309	0.778151	0	1.5682	0	0	0	0	0	1.23045	1.14613	1.92942	0	0	1.20412	0	0	0	0	0	0	0	0	0	0	0.60206	0.845098	0.845098	2.09342	1	1.93952	2.62941	3.43441	1.04139
8798-1	8798	8798-1	0.954243	0.60206	0	0	0	0	1.20412	3.11294	0.69897	1.4624	0.954243	0	2.35411	0.954243	0.69897	0	1.65321	0	0	0	0	0	1.36173	0	2.19866	0	0	0	0	0	0	0	0	0	0	0	0	0	0	1.04139	0.69897	2.29447	1.11394	2.02938	2.67578	3.39023	1
8798-3	8798	8798-3	0	1	0	0	0	0	1.27875	2.69548	1.20412	1.32222	1.20412	0.477121	2.22011	0.60206	1.04139	0	1.4624	0	0	0	1.30103	0	1.20412	2.79865	1.6902	0	0.60206	2	0	1.50515	1	1.88649	0.954243	0	0	0.69897	0	0	0	1.11394	1.04139	2.39094	1.27875	2.06446	2.60638	3.29951	1.17609
8799-3	8799	8799-3	0	0.60206	0	0	0	0	1.44716	2.7356	1.04139	1.41497	1.39794	1.04139	2.70586	1.57978	0	0	1.27875	0	0	1	0	0	1.51851	1.57978	1.54407	0	0	1.51851	0.845098	0	0	0	0	0	0	0	0	0	0	0.954243	1.34242	2.3962	1.20412	2.28103	3.01072	3.65648	1.23045
8799-1	8799	8799-1	0	0.60206	0	0	0	0	0.954243	2.53782	0.477121	0.954243	1.04139	0	2.45637	1.25527	0.60206	0	1	0	0	0.477121	0.477121	0	1.07918	1.54407	0	0	0	1.23045	0	0.30103	0	0	0.477121	0	0	0	0	0	0.69897	0.845098	0.954243	2.23553	1.30103	2.15534	2.84011	3.52737	1.32222
8799-2	8799	8799-2	1.23045	1.11394	0.954243	0	0	0	1.41497	3.08027	0.60206	1.30103	1.20412	0	2.4216	1.32222	0.778151	0	1.34242	0	0	0	0	0	1.44716	1.6902	1.89209	0	0	1.36173	0	0	0	0	0	0	0	0.477121	0	0	0	0.845098	0.90309	2.10721	1.11394	2.0607	2.6149	3.3668	1.14613
8800-3	8800	8800-3	1	0.30103	0	0	0	0	0	3.13322	0	1	0	0	2.43297	1.44716	0.845098	0	1.47712	0	0	0	0	0	0.954243	0	1.6902	0	0	1.11394	0	0	0	0	0	0	0	0	0	0	0	0	0	2.30963	0.69897	1.83885	2.62839	3.53122	1.14613
8800-1	8800	8800-1	0.778151	0	0	0	0	0	1.04139	3.26174	0	1.50515	1.47712	0.69897	2.61805	1.66276	0.954243	0	1.44716	0.477121	0	0	0	0	1.41497	0	2.05308	0	0	0.90309	0	0	0	0	0	0	0	0	0	0	0.845098	0.60206	1.17609	2.44248	1.14613	2.14301	2.66276	3.58399	1.47712
8800-2	8800	8800-2	0	0	0	0	0	0	0	2.48287	0.90309	1.34242	1.20412	0	2.63043	1.38021	0.90309	0	1.17609	0	0	0	0	0	1.11394	0.69897	0	0	0	1.39794	0	0	0	0	0	0	0	0	0	0	0.69897	0	0.60206	2.48001	0.30103	2.08636	2.55509	3.56608	1.38021
8801-2	8801	8801-2	0.778151	0.954243	0	0.778151	0	0	1.25527	3.01912	0.69897	1.23045	1.11394	1.07918	2.4183	1.25527	0.778151	0	1.38021	0.69897	0	0	0	0	0.845098	0.845098	2.02119	0	0	1.17609	0	0	0	0	0	0	0	0	0.69897	0	0	0.60206	0	2.27875	0.845098	2.0569	2.59106	3.2887	1.30103
8801-3	8801	8801-3	0	0	0	0	0	0	0	3.23426	0	1.17609	0.69897	0.30103	2.37475	1.41497	0.845098	0	1	0	0	0	0	0	0.845098	0.954243	1.6902	0	0	0.90309	0	0	0	0	0	0	0	0	0	0	0	0	0	2.22011	1	1.91908	2.54531	3.51402	1.20412
8801-1	8801	8801-1	0.845098	0.954243	0	0	0	0	0.60206	3.19948	0	1.17609	0.69897	0	2.15229	0.845098	0.477121	0	1.41497	0	0	0	0	0	1.27875	0	1.79934	0	0	0.69897	0	0	0	0	0	0	0	0	0	0	0	0	0.778151	2.06446	0	1.77085	2.53782	3.35736	1.20412
8803-1	8803	8803-1	0	0	0	0	0	0	1.17609	3.05881	0.69897	1.25527	0.778151	0.69897	2.26951	0.69897	0.69897	0	1.23045	0	0	0	0	0	0.90309	0	2.03743	0	0	0	0	0	0	0	0	0	0	0	0	0	0	0	0.60206	2.12385	0.845098	1.5682	2.43136	3.27898	1.17609
8803-2	8803	8803-2	1.23045	0.90309	0	0	0	0	0	3.197	0	1.39794	0.954243	0.477121	2.25042	1.30103	0.90309	0	1.51851	0	0	0	0	0	1.38021	0	1.83885	0	0	0	0.477121	0	0	0	0	0	0	0	0	0	1.11394	0.90309	0	2.13354	0	2	2.71767	3.4101	1.34242
8803-3	8803	8803-3	1.17609	0.845098	0	0	0	0	0.60206	3.22917	0	1.54407	1.23045	0	2.33445	1.20412	1	0	1.716	0	0	0	0	0	1.07918	0	2.01703	0	0	0	0	0	0	0	0	0	0	0	0	0	1.25527	0	0.845098	2.27416	1.17609	1.94448	2.4609	3.50529	0.90309
8804-1	8804	8804-1	1.04139	1.23045	0	0	0	0	1.27875	3.07737	0.60206	1.34242	0.60206	0.90309	2.37107	1.14613	1.04139	0	1.65321	0	0	0	0	0	1.50515	0	2.0569	0	0	1.14613	0	0	0	0	0	0	0	0	0	0	0	0	0.60206	2.31387	1	1.92428	2.3962	3.29667	1.04139
8804-2	8804	8804-2	0.477121	0.30103	0	0	0	0.30103	0.69897	3.16017	0	1.50515	0.845098	0.845098	2.23553	1.30103	0.954243	0	1.34242	0	0	0	0	0	1.32222	1.30103	1.72428	0	0	0.90309	0	0	0	0	0	0	0	0	0	0	0	0.90309	1.23045	2.25042	0	1.78533	2.51983	3.36342	1.27875
8804-3	8804	8804-3	0	0.60206	0	0	0	0	0.954243	2.64933	0	1.27875	1.32222	1.25527	2.56348	1.07918	0.778151	0	1.4624	0	0	0	0	0	0.778151	1.30103	1.83885	0	0	1.30103	0	0	0	0	0	0	0	0	0	0.60206	0.30103	1.04139	0.90309	2.53908	1.30103	2.27646	2.72016	3.47756	1.38021
8807-2	8807	8807-2	1.27875	0.60206	0	0	0	0.30103	0.60206	3.10619	0	1.38021	0.477121	0	2.36736	1.14613	0	0	1.27875	0	0	0	0	0	1.17609	0	1.99123	0	0	0	0	0	0	0	0	0	0	0	0	0	0.778151	0	0	2.15229	0.30103	1.92942	2.33041	3.35927	1.17609
8807-1	8807	8807-1	0	0	0	0	0	0	1.14613	3.15746	0	1.32222	0.845098	0	2.22789	0.477121	0.69897	0	1.43136	0	0	0	0	0	1.04139	0	1.73239	0	0	0	0	0	0	0	0	0	0	0	0	0	0	0	0.778151	1.95904	0.60206	1.79239	2.57864	3.2887	0.954243
8807-3	8807	8807-3	0	1.23045	0	0.69897	0	0	1.25527	2.97497	0.778151	1.25527	0.90309	0.60206	2.33445	1.38021	1.07918	0	1.49136	0	0	0	0	0	0.845098	1.5682	1.96379	0	0	1.20412	0	0	0	0.477121	0	0	0	0	0	0	0	0.60206	0	2.21219	1.07918	1.94939	2.3483	3.33122	1.17609
8808-3	8808	8808-3	0.60206	0	0	0	0	0	1.14613	3.17348	0.778151	1.23045	1	0.954243	2.47857	1.50515	0.845098	0	1.51851	0	0	0	0	0	1.50515	0	1.74819	0	0	0	0	0	0	0	0	0	0	0	0	0	0.845098	1	0.30103	2.10037	1.07918	1.86332	2.56703	3.49554	1
8808-1	8808	8808-1	1.20412	0.477121	0	0	0	0	0	3.3483	0	1.30103	0.845098	0.60206	2.43136	1.07918	1.04139	0	1.32222	0	0	0	0	0	1.36173	0	2.00432	0	0	0.69897	0	0	0	0	0	0	0	0	0	0	0	0.90309	1.23045	2.0086	0	2.00432	2.69636	3.50501	1.41497
8808-2	8808	8808-2	0.778151	1	0	0	0.69897	0	1.20412	3.22505	0	1.27875	1.17609	0	2.32015	1	1.04139	0	1.62325	0	0	0	0.90309	0	1.25527	1.53148	1.70757	0	0	1.07918	0	0.954243	0	1.11394	0	0	0	0.30103	0	0	0.90309	0.778151	0.845098	1.86332	0.778151	1.79239	2.57519	3.43281	1.04139
8812-1	8812	8812-1	0.845098	0.69897	0	0	0	0	0.69897	3.26316	0	1.39794	0.90309	0	2.26245	1.23045	1	0	1.51851	0	0	0	0	0	1.5563	0.778151	1.74819	0	0	0.90309	0	0	0	0.477121	0	0	0	0	0	0	0.90309	0	0.778151	2.04532	0.90309	1.94448	2.62428	3.37985	1.14613
8812-2	8812	8812-2	0.69897	0.778151	0	0	0	0	1	3.21458	0.30103	1.20412	1.25527	0	2.23045	1.36173	0.30103	0	1.49136	0.30103	0	0	0	0	1	0	1.53148	0	0	0	0	0	0	0	0	0	0	0	0	0	0.69897	0	0	2.06819	0	1.83885	2.48001	3.41296	0.69897
8812-3	8812	8812-3	0.477121	0	0	0	0	0	0	2.83885	0	1.14613	1	0	2.64933	1.66276	0	0	1.25527	0	0	0	0	0	0	0	1.54407	0	0	0	0	0	0	0	0	0	0	0	0	0	0	0	1.23045	2.36922	0.60206	2.13672	2.7574	3.65002	1.44716
8814-2	8814	8814-2	1.27875	0.954243	0	0	0	0	1.04139	3.16702	0	1.38021	1.20412	0	2.26951	1.23045	0.477121	0.477121	1.41497	0	0	0	0	0	1.23045	0	1.76343	0	0	0.90309	0	0	0	0	0	0	0	0	0	0	0	0	0.778151	2.26482	0.69897	1.89763	2.82543	3.39428	0.954243
8814-1	8814	8814-1	0	0.60206	0	0	0	0	0.90309	2.70927	0.845098	0.845098	1.20412	0.90309	2.56229	1.20412	0.30103	0	1	0	0	0	0	0	0.954243	1.07918	1.30103	0	0	1.23045	0	0	0	0	0	0	0	0	0	0	0.60206	0	0.954243	2.4843	1.25527	2.3483	2.74896	3.5649	1.47712
8814-3	8814	8814-3	0.90309	0.954243	0	0	0	0	0.69897	3.17984	0	1.23045	1.25527	0.69897	2.33445	0.845098	0.30103	0	1.32222	0	0	0	0	0	1.25527	1.44716	1.85733	0.30103	0	0.90309	0	0	0	0	0	0	0	0	0	0	0.90309	0.477121	0.69897	2.18752	0.778151	1.89209	2.48572	3.37949	1.20412
8815-3	8815	8815-3	0.90309	1	0.69897	0	0	0	1.23045	3.10687	0	1.49136	0.60206	0	2.19866	0.60206	0	0	1.25527	0	0	0	0	0	1.07918	0	1.66276	0	0	0	0	0	0	0	0	0	0	0	0	0	0.477121	0	0	1.94939	1.07918	1.69897	2.52114	3.29557	1.11394
8815-1	8815	8815-1	0.954243	0.845098	0	0	0	0	0.60206	3.16732	0	1.61278	0.845098	0.477121	2.45637	1.41497	1	0	1.41497	0	0	0	0	0.778151	1.11394	0	1.81291	0	0	1.27875	0	0	0	0	0	0	0	0	0	0	0	1	0.845098	2.16137	0.778151	1.97313	2.56703	3.42226	1.07918
8815-2	8815	8815-2	0.69897	0.69897	0	0	0	0	0.778151	3.08565	0	1.25527	1.23045	0.778151	2.2878	1.47712	0.60206	0	1.36173	0	0	0	0	0	1.20412	0	1.69897	0	0	0.845098	0	0	0	0	0	0	0	0	0	0	1.11394	0	0	2.1271	0.30103	1.6902	2.26482	3.35353	0.778151
8819-3	8819	8819-3	0.778151	0.845098	0	0	0	0	0.477121	3.12775	0.477121	1.30103	0.778151	0	2.32015	1.23045	0.90309	0	1.36173	0	0	0	0	0	1.20412	0	0	0	0	1.17609	0	0	0	0	0	0	0	0	0	0	0	0.778151	0.778151	2.21484	0.69897	1.76343	2.57749	3.37876	0.778151
8819-1	8819	8819-1	0	0.30103	0	0	0	0	1	2.55023	0.954243	1.17609	1.17609	0.69897	2.71349	1.74036	0.477121	0	1.04139	0	0	0	0	0	1.30103	1.97772	1.27875	0	0	1.32222	0	0	0	0	0.60206	0	0	0	0	0	0	0	1	2.68753	1.34242	2.3962	2.84757	3.54543	1.41497
8819-2	8819	8819-2	0.69897	0	0	0	0	0	0.477121	3.08707	0.60206	1.39794	0.954243	0.477121	2.3483	1.43136	1	0	1.38021	0	0	0	0	0	1.20412	0	1.85733	0	0	0.954243	0	0	0	0	0	0	0.477121	0	0	0	0	0	0.69897	2.45332	0.30103	2.00432	2.60314	3.48728	1.36173
8820-2	8820	8820-2	1.04139	0.69897	0	0	0	0	1.17609	3.09864	0	1.53148	0.954243	0.60206	2.43933	1.11394	0	0	1.20412	0	0	0	0	0	1.07918	0	2.0607	0	0	0	0	0	0	0	0	0	0	0	0	0	0.60206	0.60206	0	2.32015	1.04139	1.96379	2.47712	3.34753	1.39794
8820-1	8820	8820-1	0.69897	0.90309	0	0	0	0	1.04139	3.16077	0	1.25527	0.954243	0.90309	2.43775	1.32222	1.30103	0	1.14613	0	0	0	0	0	1.41497	0	2.08279	0	0	1	0	0	0	0.477121	0	0	0.845098	0.30103	0	0.60206	0	0.69897	0	2.33846	0.954243	1.88081	2.35603	3.36549	1.17609
8820-3	8820	8820-3	0	0.845098	0	0	0	0	0.954243	2.77159	0.845098	1.41497	1.38021	0	2.80277	1.79239	1.14613	0	1.25527	0	0	0	0.60206	0	1.17609	1	1.60206	0	0	1.11394	0	0.69897	0	0	0	0	0	0	0	0	0.778151	0	0.60206	2.52763	1.41497	2.30103	2.67669	3.65475	1.6721
8822-3	8822	8822-3	0	0	0	0	0	0	0.477121	2.71012	0	1.25527	1.20412	0	2.66745	1.17609	1.04139	0	1.27875	0	0	0	0	0	1.20412	0	0	0	0	0.69897	0	0	0	0	0.60206	0	0	0	0	0	0.954243	1.04139	0	2.5977	0.845098	2.08636	2.77012	3.66539	1.51851
8822-1	8822	8822-1	0	0	0	0	0	0	1.17609	2.85431	0	0.60206	1.14613	0.778151	2.29003	0.778151	0.477121	0	1.4624	0	0	0	0	0	1.27875	1.36173	1.99564	0	0	1.04139	0	0	0	0	0	0	0	0	0	0.477121	0	0.954243	0	2.49831	0.845098	1.94939	2.50651	3.23553	1
8822-2	8822	8822-2	1.17609	1.38021	0.60206	0.60206	0.60206	0	1.07918	2.93752	0	1.41497	1.23045	0	2.27646	0.954243	0.477121	0	1.49136	0	0	0	0	0	1.17609	1	1.89209	0	0	0.954243	0	0.954243	0	0	0	0	0	0	0	0	0	0	0.30103	2.24797	0	1.95904	2.47857	3.34967	0.845098
8823-1	8823	8823-1	0.90309	0.477121	0	0	0	0	1.07918	3.07262	0	1.38021	0	0.60206	2.20412	0	0.60206	0	1.27875	0	0	0	0	0	1.53148	0	0	0	0	1.04139	0	0	0	0	0	0	0	0	0	0	0	0	1.04139	1.94939	0.845098	1.76343	2.6981	3.37199	1.30103
8823-2	8823	8823-2	1.04139	1	0	0	0	0	0.954243	3.06633	0	1.23045	0.90309	0	2.26245	0.778151	0	0	1.5682	0	0	0	0	0	0.954243	0	1.83885	0	0	0.845098	0	0	0	0	0	0	0	0	0	0	0	0.60206	0.30103	2.11059	0.90309	1.93952	2.65801	3.40807	1
8823-3	8823	8823-3	0	0	0	0	0	0	0.778151	2.56585	0	0.90309	0	0.778151	2.62737	1.81954	0.477121	0	1.11394	0	0	0	0	0	1.11394	0	0	0	0	1.38021	0	0	0	0	0	0	0	0	0	0	0.69897	0	1.14613	2.26717	1.30103	2.20683	2.51188	3.5885	1.04139
8824-1	8824	8824-1	0	0	0	0	0	0	0	2.90255	0	1.30103	0.954243	0.477121	2.52763	1.36173	0.69897	0	1.44716	0	0	0	0	0	1.36173	0	1.62325	0	0	0	0	0	0	0	0	0	0	0	0	0	1.11394	0	1.04139	2.37107	1.14613	2.03342	2.90741	3.58524	1.39794
8824-3	8824	8824-3	0.954243	1	0	0	0	0	0.69897	3.17984	0	1.49136	1.04139	0	2.30103	1.43136	0.477121	0	1.20412	0	0	0	0	0	1.36173	0.954243	1.77085	0	0	0.954243	0	0	0	0	0	0	0	0	0	0	0.30103	0	1.04139	2.14922	0.778151	1.76343	2.58995	3.43807	1
8824-2	8824	8824-2	0.69897	0.30103	0	0	0	0.778151	0	3.19562	0	1.30103	0.845098	0.477121	2.30963	1.34242	0.845098	0	1.44716	0	0	0	0	0	1.23045	0	1.85733	0	0	1.07918	0	0	0	0	0	0	0	0	0	0	0.477121	0	0.69897	2.18184	0.69897	1.75587	2.52244	3.4216	1.25527
8827-3	8827	8827-3	0	0.60206	0	0	0	0	0	2.48996	0.845098	1.27875	0.954243	1	2.64933	1.41497	1.07918	0	1.27875	0.69897	0	0	0	0	1	1.77815	0	0	0	1.62325	0	0	0	0	0.69897	0	0	0	0	0	0.90309	0.477121	0.954243	2.57054	1.23045	2.17609	2.77305	3.52608	1.4624
8827-1	8827	8827-1	0	1.04139	0	0	0	0	1.11394	2.76938	1.11394	1.32222	1.14613	0.778151	2.7007	1.5682	1	0.69897	1.23045	0	0	0	0	0	1	1.62325	1.41497	0	0	1.17609	0.30103	0	0	0	0.845098	0	0	0	0	0	0.954243	0.778151	0	2.59218	1.25527	2.27875	2.8791	3.5914	1.60206
8827-2	8827	8827-2	0.845098	0.60206	0	0	0	0.477121	1.50515	3.06258	0.90309	1.30103	0.90309	0.30103	2.30535	1.51851	0.845098	0	1.36173	0	0	0	0	0	1.39794	1.20412	2.15534	0	0	1.32222	0	0	0	0.60206	0	0	0	0	0	0	0.69897	0	0	2.33041	1.07918	2.11727	2.57403	3.33224	1.11394
8828-2	8828	8828-2	1.20412	1.25527	0	0.778151	0	0	1.20412	2.93752	0	1.30103	0.90309	0.954243	2.26717	0.845098	0.69897	0	1.57978	0	0	0	0	0	1.36173	0.90309	2.1271	0	0	1.17609	0	0	0	0	0	0	0	0	0	0	0	0.69897	0.60206	2.3962	0	1.79239	2.52375	3.2982	1.23045
8828-1	8828	8828-1	0.90309	1.11394	0	0	0	0	0	3.27989	0	1.17609	1.17609	0.778151	2.33445	1.23045	0.845098	0	1.20412	0	0	0	0	0	1.38021	0	1.88081	0	0	0	0	0	0	0	0	0	0	0	0	0	0	0	0.90309	2.32428	0.60206	1.81291	2.59329	3.40157	1.07918
8828-3	8828	8828-3	0.778151	0.477121	0	0	0	0	1.11394	3.11959	0	1.11394	1.07918	0.477121	2.36736	1.11394	0.477121	0	1.11394	0	0	0	0	0	1.07918	0	1.85733	0	0	0.845098	0	0	0	0	0	0	0	0.30103	0	0	0	0	0.477121	2.28103	0.954243	1.86923	2.46538	3.38846	1.17609
8829-3	8829	8829-3	1.14613	0.954243	1	0	0	0	1.14613	2.99211	0.69897	1.20412	1.17609	0.778151	2.31387	1.47712	0.845098	0	1.36173	0	0	0	0	0	1.30103	0.845098	1.86332	0	0	1.11394	0	0.60206	0	0	0	0	0	0	0	0	0.69897	0.778151	0	2.27875	0.90309	1.88649	2.46687	3.31681	1.25527
8829-1	8829	8829-1	0.60206	0	0	0	0	0	0.69897	3.06744	0.60206	1.25527	1.07918	0	2.21748	0.90309	0	0	1.20412	0	0	0	0	0	1.4624	0	1.86923	0	0	1	0	0	0	0	0	0	0	0	0	0	0	0	0	2.1038	0	1.86332	2.61172	3.35372	0
8829-2	8829	8829-2	1.04139	0.90309	0	0	0.60206	0	0	3.15685	0.778151	1.17609	1.25527	0	2.18184	1.34242	0	0	1.39794	0	0	0	0	0	0.845098	0	2.11059	0	0	0	0	0	0	0	0	0	0	0	0	0	0	0	0	2.13033	0.30103	1.78533	2.39094	3.41212	0.845098
8835-1	8835	8835-1	1	0.90309	0	0	0	0	1.20412	3.10924	0.954243	1.4624	0.845098	0	2.24055	0.90309	0.69897	0	1.30103	0	0	0	0	0	1.25527	0	1.87506	0	0	0.90309	0	0	0	0	0.69897	0	0	0	0	0	0	0	0.30103	2.25527	0	1.96848	2.57403	3.41564	1.14613
8835-2	8835	8835-2	1	1.25527	0	0	0.30103	0	1.14613	3.09377	0.477121	1.50515	0	0	2.04532	0	0	0	1.39794	0	0	0	0	0	1.25527	0	1.96848	0	0	0	0	0	0	0	0	0	0	0	0	0	0.69897	0	0	2.08636	0.69897	1.88081	2.57287	3.38435	0.90309
8835-3	8835	8835-3	1.04139	0.90309	0	0	0	0	1.43136	3.1284	0.60206	1.27875	1.14613	0	2.3784	0.90309	1	0	1.59106	0	0	0	0	0	1.23045	1.79239	1.54407	0	0	1.11394	0	0	0	0	0	0	0	0	0	0	0	0.845098	0.30103	2.28103	1.23045	1.89763	2.77012	3.41044	1.27875
8837-1	8837	8837-1	1.07918	0.60206	0	0	0	0	1.11394	3.09795	0.778151	1.4624	1.07918	0.845098	2.36922	1.11394	0	0	1.27875	0	0	0	0	0	1.4624	1.39794	1.99123	0	0	1.20412	0	0	0	0	0.69897	0	0	0	0	0	0	0.477121	0.778151	2.27875	1.04139	2.1038	2.6561	3.37457	1.17609
8837-2	8837	8837-2	0.845098	0.477121	0	0	0	0	1.07918	3.15442	0	1.32222	0.69897	0	2.24797	0.845098	0.477121	0	1.54407	0	0	0	0	0	1.04139	1.11394	1.81954	0	0	0.69897	0	0	0	0	0	0	0	0	0	0	0.69897	0.477121	0.69897	2.1038	0.778151	1.91381	2.617	3.34537	1.07918
8837-3	8837	8837-3	0	0.778151	0	0	0	0	1.25527	2.83123	0.845098	1.30103	1	1	2.72016	1.66276	0.845098	0.69897	1.27875	0	0	0.477121	0	0.477121	1.04139	1.14613	1.23045	0	0	0.778151	0	0	0	0	0	0	0	0	0	0	0.778151	0	0.778151	2.43457	1.39794	2.37291	2.9489	3.60412	1.65321
8838-2	8838	8838-2	1.25527	1.04139	0	0	0	0	0.69897	3.21219	0	1.41497	1.11394	0	2.36736	1.14613	0	0.60206	1.64345	0	0	0	0	0.90309	1.47712	0.90309	1.74819	0	0	1	0	0	0	0	0	0	0	0	0	0	0.90309	0.778151	0	2.12385	0.60206	1.76343	2.51188	3.37014	1.20412
8838-3	8838	8838-3	0	0	0	0	0	0	0	2.94349	0	1.32222	1.30103	0.69897	2.55267	1.50515	0.845098	0	1.23045	0	0	0	0	0	1.20412	1.17609	1.4624	0	0	0.90309	0	0	0	0	0	0	0	0	0	0	1	0	0	2.26951	1.11394	1.97313	2.5092	3.55425	1.23045
8838-1	8838	8838-1	0.845098	0	0	0	0.60206	0	0.477121	2.95279	0	1.49136	1	1	2.7007	1.20412	1.04139	0	1.20412	0	0	0	0	0	1.32222	0.954243	1.65321	0	0	1.30103	0	0	0	0	0	0	0	0	0	0	1.27875	0.60206	0.778151	2.4216	1.14613	2.2878	2.73957	3.59759	1.43136
8839-1	8839	8839-1	1	0.477121	0	0	0	0	1.04139	3.08707	1.07918	1.50515	1.23045	0	2.22272	1.23045	0	0	1.41497	0	0	0	0	0	1.04139	1.20412	2.07555	0	0	0	0.778151	0	0	0	0	0	0	0	0	0	0.69897	0.477121	0	1.91908	1.23045	1.92428	2.68931	3.35044	0.845098
8839-2	8839	8839-2	1.23045	1.14613	0	0	0	0	1.14613	3.03941	0.69897	1	0.954243	0.477121	2.20952	1.04139	0.69897	0	1.50515	0	0	0	0	0	0.60206	0	1.86332	0	0	1.38021	0	0	0	0	0	0	0	0	0	0	0	0	0	1.8451	0.845098	1.30103	2.6561	3.34361	0.778151
8839-3	8839	8839-3	1.11394	1.07918	0	0	0.477121	0	1.07918	3.09237	0	1.32222	0.954243	0	2.4133	1.07918	0.69897	0.778151	1.49136	0	0	0	0	0	1.43136	0	2.07188	0	0	1.38021	0	0	0	0	0	0	0	0	0	0	0	0.477121	0	2.07555	0.69897	1.85733	2.70927	3.3934	1.04139
8840-1	8840	8840-1	0	0	0	0	0	0	1.36173	2.97727	0.69897	1.39794	0.845098	0.477121	2.59988	1.27875	0	0.778151	1.36173	0	0	0	0	0	1.04139	1.81291	1.75587	0	0	1.41497	0	0	0	0	0.69897	0	0	0	0.60206	0	0	0	0.845098	2.51983	1.11394	2.24055	2.85673	3.44731	1.23045
8840-2	8840	8840-2	0	0.778151	0	0	0	0	1.07918	3.08171	1.07918	1.30103	1.20412	0	2.34439	1.20412	1.04139	0	1.23045	0	0	0	0	0	0.845098	0	1.716	0	0	1.07918	0	0	0	0	0	0	1.11394	0	0	0	0.69897	0	0.90309	2.21219	0.778151	1.98677	2.68124	3.45317	1.07918
8840-3	8840	8840-3	0.778151	0.60206	0	0	0	0	1.11394	3.02284	0	1.50515	1.14613	0	2.13672	1.20412	0	0	1.5563	0	0	0	0	0	1.04139	0	2.13988	0	0	0	0.69897	0	0	0	0	0	0	0	0	0	0	0	0	2.21748	0.30103	1.83885	2.48855	3.31827	1.04139
8841-2	8841	8841-2	1.07918	0.778151	0	0	0	0	0.778151	3.05918	0.477121	1.14613	0.954243	0	2.19033	1.20412	0.30103	0	1.07918	0	0	0	0	0	0.778151	0	1.61278	0	0	0	0	0	0	0	0	0	0	0	0	0	0	0	0	2.08991	1	1.65321	2.27416	3.30963	1.11394
8841-1	8841	8841-1	0.60206	0.69897	0	0	0	0	0.60206	3.18977	0	1.54407	0.90309	0	2.35411	1.32222	0	0	1.49136	0	0	0	0	0	1.07918	0	1.78533	0	0	1	0	0	0	0	0	0	0	0	0	0	0	0	1.14613	2.27646	1.14613	2.01284	2.67852	3.44932	1.11394
8841-3	8841	8841-3	0	0.778151	0	0	0	0	0.60206	2.75664	0	1.36173	0.954243	0	2.64048	1.43136	0.845098	0	1.34242	0	0	0	0	0	1	1.25527	1.65321	0	0	1.11394	0.845098	0	0	0	0	0	0	0	0	0	0.954243	0	0	2.36736	1.38021	2.21748	2.68664	3.51957	1.57978
8844-3	8844	8844-3	0	0.60206	0	0	0	0	0.778151	2.69548	0.30103	1.36173	1.04139	0	2.52763	1.51851	0.60206	0	1.14613	0	0	0	0	0	0.954243	1.23045	0.954243	0	0	1.14613	0	0	0	0	0	0	0	0	0	0	0	0.477121	0	2.42325	0.954243	2.08279	2.78176	3.52388	1.27875
8844-1	8844	8844-1	0.477121	0.477121	0	0	0	0	1.4624	2.90255	1	1.54407	1	0.69897	1.5682	0	1.43136	0	1.92942	0	0	0	0.778151	0	1.34242	1.98677	1.91381	0	0.60206	1.86332	0	1	0	1.79934	0	0	0.90309	0.778151	0	0	0	0	0.60206	2.01284	1.25527	1.79239	2.22531	3.03019	0.954243
8844-2	8844	8844-2	0	0.477121	0	0	0	0.60206	1.11394	2.53782	0.845098	1.32222	1.04139	1.11394	2.55751	1.36173	0.90309	0	1.36173	0.60206	0	0	0.778151	0	1.32222	1.92942	1.51851	0	0	1.6721	0	0	0	0	0	0	0	0	0	0	0	0.69897	1.11394	2.70157	1.07918	2.20412	2.85003	3.5088	1.61278
8846-1	8846	8846-1	0.60206	0.90309	0	0	0	0	1.38021	2.83187	0.477121	1.20412	0.69897	0	2.29885	0	0	0	1.61278	0	0	0	0	0	1.25527	2.24551	1.6902	0	0	1.60206	0	0	0	0	0	0	0	0	0	0	0	0.90309	0.477121	2.26482	0	1.88081	2.57519	3.29667	0
8846-2	8846	8846-2	1.04139	1.36173	0	0	0	0	1.53148	2.58995	0.778151	0.69897	1	0	2.57403	1.68124	0.69897	0.60206	1.54407	0	0	0	0	0	1.39794	2.4133	1.92428	0	0	1.34242	0	0	0	0	0	0	0	0	0	0	0.30103	0.845098	0.845098	2.59879	1.20412	2.02531	2.81624	3.51095	0.954243
8846-3	8846	8846-3	1.23045	1.04139	0	0	0	0	1.5563	2.92583	0	1.14613	0.954243	0.778151	2.17609	1.14613	0	0.845098	1.65321	0	0	0	0	0	1.38021	2.16137	1.77085	0	0	1.716	0	0	0	0	0	0.30103	0	0	0	0	0.477121	0	1.79239	2.24551	0.69897	1.92428	2.60853	3.35679	1.23045
8847-2	8847	8847-2	1.11394	0.954243	0.60206	0	0	0	1.23045	2.85431	0.69897	1.27875	0.69897	0.845098	2.36361	1.23045	0.90309	0	1.66276	0	0	0	0	0	1.38021	0.90309	2.18469	0	0	1.44716	0	0	0	0	0	0	0	0	0	0.30103	0	0	0.778151	2.26007	0.954243	1.96379	2.53782	3.34674	0.778151
8847-1	8847	8847-1	1.17609	0	0	0	0	0	0	3.23679	0	1.25527	0.845098	0.69897	2.24797	0.778151	0.60206	0	1.5563	0	0	0	0	0	1.5563	0	1.73239	0	0	1	0	0	0	0	0	0	0	0	0	0	0	0.69897	0.69897	2.26007	0	1.86332	2.60531	3.43136	1.14613
8847-3	8847	8847-3	0	0	0	0.30103	0	0	1.11394	2.51188	1.14613	1.32222	1.14613	0.60206	2.69636	1.34242	0	0	1.23045	0	0	0	0	0	1.30103	1.47712	1.51851	0	0	1.86923	0	0	0	0	0	0	0	0	0	0	0.69897	0	0.60206	2.5682	1.32222	2.2833	2.8202	3.57576	1.60206
8848-3	8848	8848-3	0	0	0	0	0	0	0	2.94694	0.778151	0.90309	0.954243	0.778151	2.549	1.41497	1.17609	0	0.954243	0	0	0	0	0	1	0	1.36173	0	0	0	0	0	0	0	0	0	0	0	0	0	0.845098	0.60206	1.17609	2.41664	0.90309	2.26717	2.72181	3.6066	1.61278
8848-1	8848	8848-1	1.07918	0	0	0	0	0	1.20412	3.05994	0	0.90309	0.69897	0.60206	2.32838	1.43136	0.30103	0	1.20412	0	0	0	0	0	1.14613	1.25527	1.89763	0	0	0	0	0	0	0	0	0	0	0	0	0	0	0	0.60206	2.18752	0.845098	1.83251	2.51455	3.32919	1.11394
8848-2	8848	8848-2	0	0.477121	0	0	0	0	1	2.86332	0	1.11394	0.90309	0.845098	2.61066	1.36173	1	0.845098	1.32222	0	0	0	0	0	1.11394	0	1.51851	0	0	1.38021	0	0	0	0	0	0	0	0	0	0	0	0.60206	0.954243	2.54531	1.38021	2.18469	2.95085	3.63849	1.41497
8850-3	8850	8850-3	0.90309	0.69897	0	0	0	0	0.954243	3.06108	0.60206	1.36173	1.11394	0.477121	2.4014	1.23045	0.60206	0	1.36173	0	0	0	0	0	1.44716	0	1.98677	0	0	0.954243	0	0	0	0	0	0	0	0	0	0	0.69897	0	1	2.11394	0.60206	1.81291	2.5832	3.42797	1.04139
8850-1	8850	8850-1	0.778151	1.04139	0	0	0	0	1.23045	2.92273	0.954243	1.27875	1.23045	0	2.17898	1.27875	0.845098	0	1.20412	0	0	0	0	0	1.34242	1.64345	1.9345	0	0	1.41497	0	0	0	0	1.04139	0	0	0	0	0.477121	0	0	0	2.28103	0.60206	1.94448	2.58659	3.26007	1.30103
8850-2	8850	8850-2	0.90309	0.69897	0	0	0	0	0.845098	3.17551	0	1.27875	0.954243	0	2.36173	1.34242	0	0.845098	1.54407	0	0	0	0.69897	0	1.4624	0	1.97772	0	0	1.23045	0	0	0	0	0	0	0	0	0	0	1.11394	0	0	2.18752	1.07918	2.0086	2.54531	3.4239	1.07918
8851-2	8851	8851-2	0.845098	1.07918	0	0.60206	0	0.69897	1.25527	3.00604	0	1.25527	0.778151	0	2.31175	1.04139	0	0	1.44716	0	0	0	0	0	1.62325	0	1.9345	0	0	0.845098	0	0	0	0	0	0	0	0	0	0	0	0	0.60206	2.1271	0.845098	1.90849	2.66558	3.36996	0.90309
8851-3	8851	8851-3	1.07918	1.14613	0	0	0	0	1.32222	3.03141	0	1.23045	0.90309	0.90309	2.37658	1.36173	0	0	1.54407	0	0	0.30103	0	0	0.845098	1.04139	2	0	0	1.23045	0	0	0	0	0	0	0	0	0	0	0	0.778151	0.69897	2.27416	0.845098	2.04922	2.65896	3.40415	0.90309
8851-1	8851	8851-1	0.477121	0.778151	0	0	0	0	1.07918	2.89154	0	1.36173	0.69897	0	2.36173	1.14613	0	0	1.32222	0	0	0	0	0	1.36173	1.90309	1.78533	0	0	1.53148	0	0.954243	0	0	0.60206	0	0	0	0	0	0	0	1.04139	2.16137	1.25527	2.04922	2.63144	3.37401	1
8853-1	8853	8853-1	1.04139	0.30103	0	0	0	0	1.27875	3.0249	0	1.44716	0.954243	0	2.36361	1.59106	0.30103	0	1.4624	0	0	0	0	0	1.27875	1.34242	2.03743	0	0	1.4624	0	0	0	0	1.17609	0	0	0	0	0	0.60206	0	1.07918	2.02938	0.69897	2.04922	2.71265	3.37731	1.30103
8853-2	8853	8853-2	1	0.90309	0.778151	0	0	0	1.25527	2.94151	0	1.27875	1	0.90309	2.14301	1.04139	0.69897	0	1.43136	0	0	0	0	0	1.59106	0	1.63347	0	0	0.778151	0	0	0	0	0	0	0	0	0	0.30103	0	0.778151	1	1.77085	0.69897	1.86923	2.44248	3.27439	1.11394
8853-3	8853	8853-3	0.954243	0.845098	0	0	0.60206	0	1.11394	3.03782	0	1.14613	0.778151	0	2.23553	1.23045	0.69897	0	1.64345	0	0	0	0	0	1	0	1.57978	0	0	1.07918	0	0	0	0	0	0	0	0	0	0	0	0.60206	0.60206	1.86332	0.90309	1.87506	2.65128	3.34498	1.14613
8854-1	8854	8854-1	1	0	0	0	0	0	0.845098	3.19033	0.778151	1.27875	1.20412	0	2.31806	0.778151	0.60206	0	1.49136	0	0	0	0	0	1.14613	0.778151	1.62325	0	0	0.90309	0	0	0	0	0	0	0	0	0	0	0.90309	0	1.04139	2.0569	0.778151	1.89209	2.59439	3.31911	1.27875
8854-2	8854	8854-2	0	0.30103	0	0	0	0	1.04139	3.17609	0.69897	1.04139	1	0	2.39967	1.43136	0.90309	0	1.23045	0	0	0	0	0	1.39794	0	1.75587	0	0	1.14613	0	0	0	0	0	0	0	0	0	0	1.04139	0	0.69897	2.20952	0.845098	2	2.62737	3.48387	1.34242
8854-3	8854	8854-3	0	0	0	0	0	0	1	3.19145	0	1.38021	0.69897	0.778151	2.35218	0	0	0	1.30103	0	0	0	0	0	0.69897	0	1.91908	0	0	0	0.477121	0	0	0	0	0	0	0	0	0	0.778151	0	0	2.19312	0.69897	1.79934	2.57519	3.40841	1.11394
8855-2	8855	8855-2	1.04139	1.14613	0	0	0	0.30103	0.69897	3.14675	1	1.17609	0.69897	0	2.15534	1.11394	0.60206	0	1.34242	0	0	0	0	0	1.25527	0	1.47712	0	0	1.17609	0	0	0	0	0	0	0	0	0	0	1.07918	0.778151	0.69897	2.09342	0.60206	1.85733	2.51055	3.39655	1.23045
8855-1	8855	8855-1	1.23045	0.90309	0	0	0	0.477121	0	3.2393	0	1.17609	1.17609	0.60206	2.34044	1.14613	0.90309	0	1.4624	0	0	0	0	0	1.30103	0	1.86923	0	0	1.30103	0	0	0	0	0.60206	0	0	0	0	0	0	0.60206	1.04139	2.12057	1.23045	1.97772	2.69108	3.43775	1.27875
8855-3	8855	8855-3	0	0	0	0	0	0	0	2.94448	0.954243	1.39794	1.04139	0	2.43775	1.44716	0	0	1.4624	0	0	0	0	0	1.47712	0	1.96848	0	0	1.32222	0	0.90309	0	0	0	0	0	0	0	0	0.845098	1.07918	1.23045	2.27416	1.4624	2.1271	2.6149	3.67025	1.44716
8856-3	8856	8856-3	0.90309	0.90309	0	1.17609	0	0	1.5682	2.89209	0.69897	1.47712	1.23045	0.954243	1.95424	0.69897	1.17609	0	1.73239	0	0	0	1.23045	0.30103	1.11394	2.5302	1.74036	0	0	2.02938	0	1.32222	0	2	0	0	0	0	0	0	0.69897	0	0	2.2833	1.14613	2	2.51851	3.15746	0
8856-1	8856	8856-1	1	1.04139	0	1.04139	0	0	1.50515	2.97081	0.60206	1.11394	1.04139	0.845098	2.38202	1.36173	1	0	1.51851	0	0	0	0	0	1.32222	1.59106	2.08991	0	0	1.43136	0	0	0	0.845098	0.778151	0	0	0	0.477121	0	0.477121	0.60206	0.845098	1.97313	0.90309	2.01284	2.58771	3.31744	0.90309
8856-2	8856	8856-2	1.07918	0.845098	0	0	0	0	1.17609	3.11528	0	1.11394	1.04139	0.845098	2.27646	1.34242	0.69897	0	1.60206	0	0	0	0	0	1.32222	0	1.77815	0	0	0.954243	0	0	0	0	0	0	0	0	0	0	0.90309	0	0	1.78533	0.69897	1.79934	2.55388	3.42749	0.954243
8857-1	8857	8857-1	0.90309	0.845098	0	0	0	0	1.11394	3.07078	0	1.27875	0.845098	0	2.00432	0.845098	0.60206	0	1.36173	0	0	0	0	0	1.44716	0	0	0	0	0	0	0	0	0	1	0	0	0	0	0	0.60206	0	0	2.11394	0.845098	1.89763	2.64147	3.2413	1.27875
8857-2	8857	8857-2	0	0	0	0	0	0	0.69897	2.94694	0.778151	1.30103	1.20412	0.845098	2.53403	1.34242	1.17609	0	1.49136	0	0	0	0	0	1.11394	1.44716	1.61278	0	0	1.20412	0	0.69897	0	0	0	0	0	0	0	0	0.90309	0.60206	0.778151	2.49276	1.27875	2.27875	2.78247	3.51996	1.25527
8857-3	8857	8857-3	0.954243	1.11394	0	0	0	0	1.14613	3.04218	0.60206	1.30103	0.954243	0.69897	2.29885	0.90309	0.60206	0	1.30103	0	0	0	0	0	1.20412	0.778151	1.90309	0	0	1.14613	0	0	0	0	0	0	0	0	0	0	0	0	0	2.21484	0.69897	1.9345	2.58433	3.35044	0.845098
8858-2	8858	8858-2	0.778151	1.07918	0	0	0	0	1.38021	2.96942	0	1.36173	1	0.778151	2.3784	1.30103	1.04139	0	1.51851	0	0	0	0	0	1.57978	1.41497	2.02938	0	0	1.32222	0	0	0	0	0.30103	0	0	0	0	0	0	0	0	2.3032	1.17609	1.96848	2.57749	3.31323	1.20412
8858-1	8858	8858-1	0.69897	1.04139	0	0	0	0	1.20412	3.04139	0.60206	1.27875	1.34242	0	2.36922	0.778151	1.11394	0	1.36173	0	0	0	0	0	1.14613	1.20412	1.92942	0	0	1.17609	0	0	0	0	0	0	0	0.778151	0	0	0	0	0.30103	2.35025	0.954243	1.99564	2.62941	3.31869	1.17609
8858-3	8858	8858-3	0.477121	0.90309	0	0	0	0	1	2.57171	1.04139	0.90309	1.17609	0.90309	2.60531	1.59106	0.60206	0.477121	1.27875	0	0	0	0	0	0.90309	1.73239	0.954243	0	0	1.41497	0	0	0	0	0	0	0	0	0	0	0.477121	0	0	2.45484	0.954243	2.3483	2.75891	3.49262	1.32222
8859-3	8859	8859-3	0	0	0	0	0	0	0.477121	2.73239	0	1.14613	0.954243	0	2.50106	1.32222	0.30103	0	1.34242	0	0	0	0	0	0	1.30103	0	0	0	1.07918	0	0	0	0	0	0	0	0	0	0	0	0	0.778151	2.34439	0.60206	2.02531	2.84448	3.59306	1.47712
8859-1	8859	8859-1	1.20412	1.20412	0	0	0.30103	0	0.69897	3.25261	0	1.11394	1	0	2.19866	1.14613	0.477121	0	1.49136	0	0	0	0	0	1.11394	0.845098	1.74036	0	0	0.69897	0	0	0	0	0	0	0	0	0	0	0.778151	0.30103	0	2.15534	0.60206	1.86923	2.67486	3.39933	1.27875
8859-2	8859	8859-2	0.845098	0	0	0	0	0	0.778151	3.14768	0.60206	1.30103	1.25527	0	2.2014	1.17609	0	0	1.5563	0	0	0	0	0	1.27875	0	1.97313	0	0	0.69897	0	0	0	0	0	0	0	0	0	0	0.69897	0.845098	0.90309	2.07188	0.954243	1.98677	2.42813	3.4178	0.845098
8861-3	8861	8861-3	0.778151	0	0	0	0	0.30103	1.51851	2.91855	0	0.60206	1	0.477121	2.2833	1.17609	0.90309	0	1.23045	0	0	0	0	0	1.17609	0	1.716	0	0	0.954243	0	0	0	0	0	0	0	0	0	0	0	0.90309	0	2.31387	1.14613	1.85126	2.42488	3.27114	0.845098
8861-1	8861	8861-1	1.20412	1.11394	0	0	0.30103	0	0.69897	3.20358	0	1.25527	1.30103	0.60206	2.46982	1.04139	0.845098	0	1.4624	0	0	0	0	0	1.41497	0.69897	1.89763	0	0	1.25527	0	0	0	0	0.69897	0	0	0	0	0	0	0	0.845098	2.29667	0.90309	2.01284	2.57403	3.41614	0.90309
8861-2	8861	8861-2	1.11394	0.778151	0	0	0.60206	0	0.845098	3.1313	0	1.39794	0.954243	0.69897	2.3483	1.17609	0.845098	0	1.41497	0	0	0	0.477121	0	1.20412	0	1.91381	0	0	0.90309	0	0	0	0	0	0	0	0	0	0	0	0.845098	0	2.17898	0.90309	1.6902	2.48855	3.4014	1.11394
8862-2	8862	8862-2	0.845098	0.845098	0.778151	0	0	0	0.778151	3.01242	0	1.25527	0.90309	0	1.98677	0	0.90309	0	1.36173	0	0	0	0	0	1	0	1.98227	0	0	1.07918	0	0	0	0	0	0	0	0	0	0	0	0	0.60206	1.98227	0.60206	1.6902	2.54283	3.25042	0.477121
8862-1	8862	8862-1	0	0.477121	0	0	0	0	0	3.06893	0.778151	1.25527	1.04139	0.477121	2.55388	1.39794	0.477121	0.845098	1.11394	0	0	0	0	0	1.34242	0	1.77085	0	0	1.14613	0	0	0	0	0	0	0	0	0	0	0.69897	0.90309	1.23045	2.4014	1.34242	2.26717	2.8202	3.5387	1.41497
8862-3	8862	8862-3	0.60206	0.845098	0	0	0	0	0.69897	2.76343	0.69897	0.954243	1.27875	0.60206	2.59439	1.65321	0.778151	0	1.30103	0	0	0	0	0	1.20412	0.778151	1.51851	0	0	1.30103	0	0	0	0	0	0	0	0	0	0	0.69897	0.778151	1	2.37475	1	2.09691	2.66745	3.56478	1.30103
8864-3	8864	8864-3	1.11394	1.07918	0	0	0	0	1.25527	2.98046	0	1.23045	0.954243	0.60206	2.31806	0.778151	0	0	1.43136	0	0	0	0	0	1.44716	1.30103	1.99564	0.60206	0	1.23045	0	0	0	0	0	0	0	0	0	0	0	0	0	2.14301	0.845098	1.88649	2.49969	3.32634	0
8864-1	8864	8864-1	0.778151	1	0	0	0	0	0.845098	3.28959	0	1.25527	0	0	2.37291	1.11394	0.60206	0	1.17609	0	0	0	0	0	1.38021	0.845098	2.04139	0	0	0.90309	0	0	0	0	0	0	0	0	0	0	0.60206	0.477121	0	2.2878	0.954243	1.83885	2.70243	3.45133	1.23045
8864-2	8864	8864-2	0	0.778151	0	0	0	0	1.23045	2.95952	0	1.23045	0.845098	0	2.18184	0.90309	0	0	1.14613	0	0	0	0	0	1.07918	0	2.07188	0	0	0.845098	0	0	0	0	0	0	0	0	0	0	0	0	0	2.20952	1	1.98677	2.46389	3.2971	1.11394
8865-1	8865	8865-1	0	0	0	0	0	0	1	3.15534	0	1.41497	1.11394	0	2.22789	0.90309	0.30103	0	1.20412	0	0	0	0	0	1	0	1.79934	0	0	0	0	0	0	0	0	0	0	0	0	0	0	0	1.20412	2.11394	1.07918	1.92428	2.69197	3.36866	0.90309
8865-2	8865	8865-2	0.90309	0.477121	0	0	0.60206	0	1.27875	3.08849	0	1.36173	0.90309	0	2.27416	1.32222	0.60206	0	1.30103	0	0	0	0	0	1.11394	0	1.85733	0	0	1.11394	0	0	0	0	0	0	0	0	0	0	0	0	0.778151	2.17898	0.778151	1.78533	2.5563	3.31973	0.778151
8865-3	8865	8865-3	0	0	0	0	0	0	0.69897	2.74429	0.30103	1.34242	0.778151	0	2.4624	1.79934	0.60206	0	0.90309	0	0	0	0	0	0	1.34242	1.41497	0	0	1.23045	0	0.60206	0	0	0	0	0	0	0	0	0.60206	0	1.04139	2.23805	1.04139	2.03342	2.82737	3.53314	1.34242
8868-1	8868	8868-1	0.60206	0.69897	0	0	0.477121	0	0	3.22324	0	1.50515	1.23045	0.477121	2.24055	1.14613	1.11394	0	1.54407	0	0	0	0	0	1.39794	0	1.69897	0	0	1.17609	0	0	0	0	0	0	0	0	0	0	0.60206	0.69897	0.845098	2.3032	0.30103	1.72428	2.61384	3.36922	1.04139
8868-3	8868	8868-3	1.17609	0.778151	0	0	0	0	0.30103	3.25744	0	1.41497	1.11394	0	2.36922	1.14613	0.90309	0.778151	1.50515	0	0	0	0	0.778151	0.778151	0.90309	1.83251	0	0	0.845098	0	0	0	0	0	0	0	0	0	0	0	0	0	2.12385	0.477121	1.83251	2.51055	3.42488	1.04139
8868-2	8868	8868-2	1.14613	0.69897	0	0	0.69897	0	0	3.21005	0	1.36173	1.20412	0	2.25285	1.17609	0.845098	0	1.43136	0	0	0	0	0	1.25527	0	1.65321	0	0	1.07918	0	0	0	0	0	0	0	0	0	0	0.954243	0	1	2.07918	0.778151	1.83251	2.43457	3.35774	0.90309
8869-3	8869	8869-3	1.27875	1	0	0	0	0	0.90309	3.21112	0	1.17609	0	0	2.37107	1.30103	0	0	1.20412	0	0	0	0	0	1.23045	0	1.85733	0	0	0.954243	0	0	0	0	0	0	0	0	0	0	0	0	0.954243	2.19866	0.60206	1.99564	2.58883	3.43584	0.69897
8869-2	8869	8869-2	0	0.69897	0	0	0	0	1.17609	2.71517	0.60206	1.20412	0.778151	0	2.56703	1.5682	0.845098	0	1.44716	0	0	0	0	0	1.07918	1.07918	1.716	0	0	0.778151	0	0	0	0	0	0	0	0	0	0	0.845098	0.90309	1.44716	2.38382	1.27875	2.26007	2.70757	3.58377	1.4624
8869-1	8869	8869-1	1.17609	0	0	0	0	0	0	3.28914	0.845098	1.27875	1.07918	0	2.36361	1.25527	0.778151	0	1.38021	0	0	0	0	0	1.14613	1.04139	2.01703	0	0	0.60206	0	0	0	0	0	0	0	0	0	0	0.69897	0	0.954243	2.20412	0.90309	1.81291	2.62221	3.42193	1.27875
8871-1	8871	8871-1	1.04139	0.90309	0	0	0.477121	0	0.30103	3.30146	0	1.41497	0.60206	0.477121	2.18469	1.14613	0.477121	0	1.41497	0	0	0	0	0	1	0	1.79934	0	0	0.477121	0.60206	0	0	0	0	0	0	0	0	0	0	0	0	2.29667	1	1.62325	2.63548	3.47056	1.14613
8871-2	8871	8871-2	0.90309	1	0	0	0	0	1.04139	2.95761	1	1.11394	0.69897	0.954243	2.33041	1.11394	1	0	1.27875	0	0	0	0	0	1.07918	0.845098	2.09691	0	0	0.69897	0	0	0	0	0	0	0	0	0	0	0.845098	0.69897	0	2.15534	0.845098	1.90849	2.38561	3.33365	1.23045
8871-3	8871	8871-3	0.845098	0	0	0	0	0	0	3.20898	0	1.38021	1.07918	0	2.32222	0.69897	0	0	1.54407	0	0	0	0	0	0.60206	0	1.94448	0	0	0	0	0	0	0.845098	0	0	0	0	0	0	0	0	0	2.07188	0	1.79239	2.52634	3.39898	1.32222
8872-2	8872	8872-2	0.69897	1.04139	0	0	0	0	1.4624	3.05576	0.69897	0.778151	1.20412	0	2.39445	1.04139	0.69897	0	1.66276	0	0	0	0	0	1.41497	1.23045	2.15229	0	0	1.32222	0	0	0	0	0	0	0	0	0	0	0	0	0	2.21219	0.954243	2.0569	2.54654	3.3822	1.20412
8872-1	8872	8872-1	0.30103	0.477121	0	0	0	0.60206	0	2.78462	0.60206	1.41497	1.30103	1.04139	2.71933	1.61278	1.07918	0	1.27875	0	0	0	0	0	0.69897	1.62325	1.62325	0	0	1.30103	0	0	0	0	0	0	0	0	0	0	0	1.07918	1.07918	2.58092	1.11394	2.37291	2.79934	3.57761	1.27875
8872-3	8872	8872-3	0	0	0	0	0	0	0.69897	2.902	0.69897	1.20412	0.954243	1.07918	2.65514	1.63347	0.778151	0	1.34242	0	0	0	0	0	1.50515	0	1.43136	0.477121	0	0	0	0	0	0	0	0	0.30103	0	0	0	1.04139	0	1.11394	2.40654	1.14613	2.13354	2.64444	3.65523	1.39794
8874-3	8874	8874-3	0	0	0	0	0	0	0	3.0249	0.69897	1.14613	1.11394	0.778151	2.55023	1.716	0.90309	0.477121	0.845098	0	0	0	0	0	1	1.04139	0	0	0	0.778151	0	0	0	0.845098	0	0	0	0	0	0	0.778151	0	1.44716	2.32222	1	1.90309	2.81954	3.63306	1.59106
8874-1	8874	8874-1	0	0.778151	0	0	0	0	0.778151	2.87448	0	1.36173	1.39794	0	2.65514	1.5682	0.69897	0	1.32222	0	0	0	0	0	1.20412	0	1.4624	0	0	0.60206	0.778151	0	0	0	0	0	0	0	0	0	0.60206	0	1.07918	2.32838	0.845098	1.98677	2.69636	3.5768	1.44716
8874-2	8874	8874-2	0.69897	1.04139	0	0	0.477121	0.30103	1	3.24576	0	1.50515	1.39794	0.778151	2.33445	0.954243	0.69897	0	1.39794	0	0	0	0	0	1.36173	1.38021	1.85126	0	0	1.27875	0	1.04139	0	0	0.477121	0	0	0	0	0	0	0	0	2.18469	1	1.89763	2.59106	3.44963	1.20412
8875-3	8875	8875-3	0	0	0	0	0	0	0.60206	2.61384	0	1.14613	1.41497	0	2.63144	1.57978	0.845098	0	1.07918	0	0	0	0	0	0.69897	0	1.43136	0	0	0.845098	0	0	0	0	0	0	0	0	0	0	0.845098	0	0.90309	2.24797	1.20412	2.11394	2.81358	3.55461	1.30103
8875-1	8875	8875-1	0.90309	0.954243	0	0	0	0	1.25527	3.22712	0	1.41497	0.778151	0	2.4133	1.11394	0.778151	0	1.5563	0	0	0	0	0	1.38021	0	1.88649	0	0	1.04139	0	0	0	0	0	0	0	0	0	0	0.60206	0.60206	0.90309	2.05308	1	2.09342	2.77232	3.44091	1
8875-2	8875	8875-2	0.845098	0.477121	0	0	0	0	0.778151	3.03862	0	1.54407	0.60206	0.30103	2.34635	1.04139	0	0	1.30103	0	0	0	0	0	1.27875	0	1.6721	0	0	0.954243	0.60206	0	0	0	0	0	0	0	0	0	0.778151	0.477121	0	2.09691	1.04139	2.00432	2.65418	3.39602	0.954243
8876-2	8876	8876-2	1.04139	1	0.69897	0	0	0.477121	1.25527	3.21748	0.69897	1.30103	1.17609	0	2.31806	1.38021	0.477121	0	1.44716	0	0	0	0	0	1.34242	0	1.60206	0	0	0.845098	0	0	0	0	0	0	0	0	0	0	0.778151	0.778151	0.954243	2.17319	0.477121	1.83885	2.57519	3.42357	1.27875
8876-1	8876	8876-1	0	0	0	0	0	0.477121	0	3.1089	0	1.43136	1.14613	0	2.60959	1.63347	0	0	1.5682	0	0	0	0	0	1.23045	0	1.97772	0.69897	0	0.954243	0.30103	0	0	0	0	0	0	0	0	0	0.845098	0	1.27875	2.44871	1.14613	2.23045	2.74663	3.66894	1.4624
8876-3	8876	8876-3	0	0.477121	0	0	0	0	0.477121	2.7185	0	1.4624	1	0	2.56703	1.6902	0	0	1.30103	0	0	0	0	0	0	1.07918	0	0	0	1.20412	0	0	0	0	0	0	0	0	0	0	0.90309	0	1.11394	2.36736	1.27875	1.9345	2.78462	3.56431	1.14613
8877-3	8877	8877-3	0.69897	1	0	0.954243	0	0	1.38021	2.96895	0	1.14613	0.60206	0.845098	2.3784	1.41497	0	0	1.32222	0.69897	0	0	0	0	1.32222	1.70757	1.85733	0	0	1.44716	0	0	0	0	0	0	0	0	0	0	0.954243	0	0	2.27416	0.30103	1.88081	2.62014	3.33786	1
8877-1	8877	8877-1	1.11394	0	0	0	0	0	1.25527	3.12483	0	1.27875	0.90309	0	2.33846	1.11394	0.778151	0	1.34242	0	0	0	0	0	1.4624	1.25527	1.80618	0	0	0.69897	0	0	0	0	0	0	0	0	0	0	0	0	0.845098	2.29003	0.845098	1.96848	2.7332	3.44154	1.17609
8877-2	8877	8877-2	0	0	0	0	0	0	0.69897	2.40993	1.20412	1.25527	1.17609	1	2.62634	1.62325	0	0.845098	1.11394	0	0	0	0	0	1.11394	2.01703	1.51851	0	0	1.5682	0	1.04139	0	0	0	0	0	0	0	0	0.954243	0.69897	1.17609	2.36922	0.90309	2.13988	2.89042	3.52492	1.47712
8878-1	8878	8878-1	0	0.60206	0	0	0	0	1.14613	2.6981	0	1.14613	0	0	2.72181	1.39794	0.477121	0	1.32222	0	0	0	0.477121	0	1.17609	1.25527	1.17609	0	0	1.11394	0	0	0	0	0	0	0	0	0	0	0.90309	0.69897	1.38021	2.55388	1.27875	2.41664	2.8704	3.60713	1.5563
8878-2	8878	8878-2	1.38021	1.20412	0	0	0	0	1.04139	3.10992	0	1.30103	1.07918	0	2.31597	1.23045	1.04139	0	1.27875	0	0	0	0	0	1.14613	1.07918	2.02119	0	0	0	0	0	0	0	0	0	0	0	0.69897	0	0.30103	0	0.954243	2.26951	0.845098	1.82607	2.45025	3.32634	1.04139
8878-3	8878	8878-3	0	0	0	0	0	0	1	2.89597	0	1.34242	1.23045	1.27875	2.69108	1.5682	0	0	0.477121	0	0	0	0	0	1.07918	1.07918	1.61278	0	0	0.69897	0.30103	0	0	0	0	0	0	0	0	0	0.845098	0	1.07918	2.4624	1.17609	2.3032	2.67578	3.6535	1.53148
8879-1	8879	8879-1	1.20412	0.60206	0	0	0	0.477121	0	3.23249	0.477121	0.954243	0.778151	0.477121	2.33041	1.34242	0	0	1.41497	0	0	0	0	0	0.90309	0	1.90309	0	0	0	0	0	0	0	0	0	0	0	0	0	0	0	0	2.11059	0	1.87506	2.62325	3.42144	0.778151
8879-2	8879	8879-2	0.90309	0.90309	0	0	0	0	0.90309	3.17085	0	1.39794	0.954243	0.69897	2.38021	1.38021	0.778151	0	1.5563	0	0	0	0	0	1.30103	0.954243	1.70757	0.30103	0	1.17609	0	0	0	0	0	0	0	0	0	0	0	0	0.90309	2.23805	0.845098	1.82607	2.57749	3.45712	1.17609
8879-3	8879	8879-3	0	0	0	0	0	0	0	2.92634	0.477121	1.50515	0.90309	0.778151	2.52634	1.44716	0.69897	0	1.25527	0	0	0	0.477121	0.69897	1.25527	0.69897	1.23045	0	0	0.90309	0	0	0	0	0	0	0	0	0	0	1.04139	0	1.11394	2.31806	0.845098	2.08279	2.51851	3.55666	1.47712
8880-2	8880	8880-2	0.60206	0.778151	0	0	0	0	0.60206	3.23754	0	1.43136	1.11394	0	2.38382	1	0.90309	0.90309	1.43136	0	0	0	0	0	1.43136	0	1.99123	0	0	0.90309	0	0	0	0	0	0	0	0	0	0	0.90309	0	0.69897	2.13672	0.954243	1.76343	2.76418	3.44436	1.14613
8880-3	8880	8880-3	0	0	0	0	0	0	1	2.76418	0.778151	1.14613	1.07918	1	2.56703	1.41497	1.07918	0	1.17609	0.30103	0	0	0	0	1.17609	0.90309	1.69897	0	0	0.60206	0	1	0	0.30103	0	0	0	0	0	0	0.954243	0.90309	0	2.33041	1.11394	2.13033	2.617	3.59912	1.50515
8880-1	8880	8880-1	0	0	0	0	0	0	1.04139	2.84696	0.60206	1.23045	0.845098	0.30103	2.50515	1.53148	0.90309	0	1.27875	0	0	0	0	0	1.11394	0	1.69897	0	0	0.477121	0	0	0	0	0.69897	0	0	0	0	0.30103	0.477121	1.04139	0	2.26482	1.32222	2.16137	2.49693	3.55594	1.25527
8881-1	8881	8881-1	0.845098	0	0	0	0.30103	0	1.27875	3.10924	0.477121	1.04139	0.90309	0	2.36736	1.4624	0.60206	0	1.4624	0	0	0	0	0	0.778151	1.17609	1.91381	0	0	1.23045	0	0.845098	0	0	0	0	0	0	0	0	0	0	1.04139	2.06446	1.14613	1.93952	2.5977	3.45286	0.845098
8881-2	8881	8881-2	0.69897	0	0	0	0	0	0	3.04415	0	1.5563	0.954243	0	2.38382	1.34242	0	0	1.17609	0	0	0	0	0	1.25527	0.954243	1.63347	0	0	0.69897	0	0	0	0	0	0	0	0	0	0	0	0	0.69897	2.12385	0.778151	1.83885	2.67852	3.4961	1.39794
8881-3	8881	8881-3	0.778151	1.17609	0	0	0	0	0.778151	3.1038	0	0.845098	1.20412	0.60206	2.3075	1.11394	0.778151	0	1.36173	0	0	0	0	0	1.17609	0.778151	1.54407	0	0	1.17609	0.69897	0	0	0	0	0	0	0	0	0	0	0	0	2.0607	0.845098	1.68124	2.5832	3.36192	1.07918
8882-1	8882	8882-1	0.90309	0.845098	0	0	0	0	0.778151	3.27207	0	1	0.90309	0.477121	2.35218	1.20412	0.845098	0	1.20412	0	0	0	0	0	1.25527	0	1.83885	0	0	0	0	0	0	0	0	0	0	0	0	0	0	0.477121	0	2.25768	0.778151	1.85126	2.70757	3.41913	1.07918
8882-2	8882	8882-2	1.30103	1.27875	0	1.04139	0	0	1.68124	2.92221	1.04139	1.49136	1.23045	0	1.95424	0	1	0	2.02119	0	0	0	0	0	1.57978	2.22531	1.89209	0	0	1.65321	0	0.845098	0	1.47712	0.60206	0	0	0	0	0	0	1.07918	0	2.12385	1.07918	1.75587	2.40654	3.1313	0.845098
8882-3	8882	8882-3	0	0	0	0	0	0	0	2.85673	0.778151	1.11394	1.07918	0.845098	2.50651	1.43136	0.778151	0	0	0	0	0	0	0	1.14613	0	1.27875	0	0	1.11394	0.778151	0	0	0	0	0	0	0	0	0	0.845098	0	0	2.33041	1.14613	2.07188	2.70329	3.57054	1.41497
8883-2	8883	8883-2	0	0.845098	0	0	0	0	0.30103	2.80482	0	1.47712	1.14613	0	2.44404	1.34242	0.778151	0	1.07918	0	0	0	0	0	1.36173	0	1.32222	0	0	0.90309	0	0	0	0	0.69897	0	0	0	0	0	0.845098	1.07918	0.90309	2.21484	1.04139	1.89209	2.79309	3.59966	1.49136
8883-1	8883	8883-1	1.34242	1.11394	0	0	0	0	1.04139	3.35755	0	1.4624	0.845098	0	2.4014	1.11394	0	0	1.60206	0	0	0	0	0	1.25527	0	1.92428	0	0	0.954243	0	0	0	0	0	0	0	0	0	0	0.60206	0.954243	1.04139	2.2014	0	2.05308	2.72428	3.49707	1.20412
8883-3	8883	8883-3	0.845098	0.954243	0	0	0	0	0.778151	3.13513	0	1.32222	1.11394	0	2.27184	1.11394	0.778151	0	1.5563	0	0	0	0	0	1.50515	0.90309	1.77085	0	0	0	0	0	0	0	0	0	0	0	0	0	0	0	0	2.08991	0	1.99564	2.5092	3.44483	1.25527
8884-2	8884	8884-2	1.20412	1.20412	0	0.477121	0.477121	0	1.30103	2.86153	0	1.20412	1.23045	0.778151	2.25527	1.14613	0.30103	0	1.6902	0	0	0	0.477121	0	1.36173	1.96379	1.94939	0	0	1.61278	0.60206	0	0	0	0	0	0	0	0	0	0.778151	0.90309	0.845098	1.98677	0.778151	1.95424	2.62941	3.31366	1.04139
8884-3	8884	8884-3	0	1.38021	0	0	0	0	1.44716	2.89265	0	0.90309	1.17609	0.90309	2.24551	1.38021	0.69897	0	1.69897	0	0	0	0	0	1.30103	2.07555	2.09691	0	0	1.64345	0	0	0	0	0	0	0	0	0	0	0	0	0	2.16435	0.845098	1.91381	2.55991	3.23426	1
8884-1	8884	8884-1	0	0.30103	0	0	0	0	1.07918	2.63649	0.778151	1.41497	1	1.07918	2.51851	1.11394	0.477121	0	1.41497	0	0	0.954243	0	0	0.90309	2.22272	1.51851	0	0	1.23045	0	0.30103	0	0	1.14613	0	0	0	0	0	0.477121	0	1.14613	2.38021	1.14613	2.24797	2.80889	3.45591	1.43136
8885-2	8885	8885-2	0	0	0	0	0	0	0	2.96895	0	1.34242	1	0	2.50379	1.38021	0.477121	0	1.39794	0	0	0	0.477121	0	1.59106	0.954243	1.53148	0	0	1.25527	0	0	0	0.845098	0	0	0	0	0	0	0.778151	0.90309	1.07918	2.35603	1.34242	2.08636	2.84386	3.54158	1.30103
8885-3	8885	8885-3	0.60206	1.07918	0	0	0	0	0	3.11294	0.477121	1.23045	1.14613	0	2.29447	1.11394	0	0	1.41497	0	0	0	0	0	1.41497	1.11394	1.81954	0	0	0.69897	0	0	0	0	0	0	0	0	0	0	0.954243	0	1.17609	2.14922	0.778151	1.90309	2.5302	3.41229	1.25527
8885-1	8885	8885-1	0.90309	0.30103	0	0	0	0	0	3.25455	0.778151	1.30103	0.845098	0.30103	2.4456	1.17609	1	0	1.47712	0	0	0	0	0	1.34242	1.27875	1.91381	0	0	1	0	0	0	0	0	0	0	0	0	0	0	0	0	2.21748	0.90309	2.07555	2.7348	3.40243	1.17609
8886-1	8886	8886-1	0.845098	0.845098	0	0	0	0	1.14613	3.03222	0	1.17609	1.11394	0	2.12385	1.30103	0.60206	0	1.20412	0	0	0	0	0	1.32222	0	1.90849	0	0	0.954243	0	0	0	0	0.477121	0	0	0	0	0	0	0	1.07918	2.06819	0.90309	1.83251	2.66652	3.34792	1
8886-2	8886	8886-2	0.845098	1.14613	0	0	0	0	1.11394	2.98498	0	1.39794	1.11394	0	2.33445	1.23045	0.778151	0.954243	1.32222	0	0	0	0	0	1.59106	0	1.81291	0	0	1.23045	0	0	0	0	0	0	0	0	0.30103	0	0	0.477121	0	2.0607	1.32222	1.94448	2.902	3.38435	1.20412
8886-3	8886	8886-3	0.90309	0.60206	0	0	0	0.477121	1.14613	3.00561	0	0.90309	0.90309	0	2.31806	1.27875	1.04139	0	1.32222	0	0	0	0	0	1.32222	0	1.96379	0	0	0	0	0	0	0	0	0	0	0	0	0	0	0	0.69897	2.03743	0	1.90309	2.64246	3.37931	1.07918
8887-1	8887	8887-1	0	0.778151	0	0	0	0	0	2.8651	0.69897	1.32222	1.04139	0.69897	2.45484	1.41497	0.90309	0	1.36173	0	0	0	0	0	1.23045	0	1.32222	0	0	1.04139	0	0	0	0	0.845098	0	0	0	0	0	0	0	1.17609	2.35984	1.39794	1.95904	2.85854	3.58013	1.41497
8887-2	8887	8887-2	0.778151	0.90309	0	0	0	0	1.11394	3.03623	0	1.23045	1.14613	0.30103	2.33244	1.07918	0	0	1.51851	0	0	0	0	0	1.11394	0	2.03342	0	0	1.14613	0	0	0	0	0	0	0	0	0	0	0	0.845098	0	2.23553	1.17609	2.07918	2.54654	3.36717	1
8887-3	8887	8887-3	0	0	0	0	0	0	0.778151	2.79029	0	1.11394	1.11394	0	2.60314	1.81954	1.14613	0	1.17609	0	0	0	0	0	1.38021	0	1.39794	0	0	0.778151	0	0	0	0	0	0	0	0	0	0	0.845098	0	0.30103	2.3784	0.954243	2.11727	2.70842	3.65523	1.20412
8888-2	8888	8888-2	0.954243	0.778151	0	0	0	0	1.04139	3.10958	0	1.20412	1.20412	0	2.15836	0.90309	0.60206	0	1.34242	0	0	0	0.954243	0	1.44716	1.11394	1.92428	0	0	0	0	0	0	0	0	0	0	0	0	0	0	0.845098	0	2.31387	0.30103	1.69897	2.58883	3.30707	0.90309
8888-1	8888	8888-1	0.90309	0	0	0	0	0	1.11394	3.22866	0.845098	1.20412	0	0	2.31387	1.04139	0.60206	0	1.47712	0	0	0	0	0	0.778151	0.90309	1.9345	0	0	0.778151	0	0	0	0.60206	0	0	0	0	0	0	0	0	1	2.34439	0.954243	1.96848	2.68124	3.4014	1.34242
8888-3	8888	8888-3	0.30103	0	0	0.69897	0	0	0	2.78604	0	1.20412	1.20412	0.845098	2.55388	1.20412	0.60206	0	1.38021	0	0	0	0	0	1.5563	0	1.8451	0	0	1.30103	0	0	0	0	0	0	0	0	0	0	1.39794	0	1.20412	2.2833	0.954243	2.03743	2.55871	3.69179	1.49136
8889-3	8889	8889-3	0	0.778151	0	0	0	0	0.954243	3.13418	0.778151	1.20412	0.845098	1.11394	2.66464	1.5682	1.23045	0.30103	0.90309	0	0	0	0	0	1.32222	0.60206	1.51851	0	0	0.477121	0	0	0	0	0	0	0	0	0	0	1.11394	0	0	2.45179	1.47712	2.32222	2.50379	3.61574	1.51851
8889-1	8889	8889-1	0	1.20412	0.60206	0	0	0	1.50515	2.98856	1.11394	1.4624	0	0	1.64345	0.477121	1.20412	0	1.70757	0.778151	0	0	0.845098	0	1.70757	1.81291	1.82607	0	0	1.59106	0	0.954243	0	0.778151	0	0	0	0	0.30103	0	0	0.90309	1.11394	2.17609	0.954243	2.03342	2.53403	3.20439	1.04139
8889-2	8889	8889-2	1.04139	0.778151	0	0	0	0	0	3.16406	0	1.20412	0.778151	0.30103	2.35025	1.30103	0.90309	0	1.39794	0	0	0	0	0	1.07918	0	1.716	0	0	0	0	0	0	0	0	0	0	0	0	0	0.845098	0.778151	0.477121	2.20952	0	1.53148	2.5832	3.39863	1
8892-1	8892	8892-1	0	0.60206	0	0	0	0	0.954243	3.02694	0.30103	1.41497	0.845098	0	2.30103	1.17609	0	0	1.27875	0	0	0	0	0	1.23045	0.954243	2.00432	0	0	0.954243	0	0	0	0	0	0	0	0	0	0	0.778151	0	0.60206	2.40312	0.60206	1.96379	2.56937	3.30984	0.778151
8892-2	8892	8892-2	1	0.954243	0	0	0	0	0.90309	3.17696	0.69897	1.47712	1.07918	0	2.3927	1.04139	0.90309	0	1.49136	0	0	0	0	0.60206	0.90309	0	1.91381	0	0	0.954243	0	0	0	0	0	0	0	0	0	0	0	0	0	2.10037	1	1.77815	2.57864	3.40226	1.14613
8892-3	8892	8892-3	0.60206	0.69897	0	0	0	0	0.477121	2.8848	0	1.30103	1.41497	0.954243	2.6149	1.77085	0.778151	0	0.845098	0	0	0	0.30103	0	1.47712	0.845098	1.65321	0	0	1.20412	0	0.778151	0	0	0	0	0.477121	0	0	0	0.477121	0.90309	1.34242	2.48996	1.25527	2.15534	2.80956	3.70398	1.68124
8893-2	8893	8893-2	1.30103	1.14613	0	0	0	0	1.63347	2.99739	0.30103	1.04139	1.07918	0	2.27416	1.32222	0	0	1.25527	0	0	0	0	0	1.54407	1.94939	1.94448	0	0	1.716	0	0.60206	0	0	0	0	0	0	0	0	0	0.60206	0	2.31597	0.778151	1.6902	2.64836	3.35411	0.954243
8893-1	8893	8893-1	0	0.954243	0	0.954243	0	0	1.38021	2.8537	0.845098	0.954243	0	0.30103	2.28556	1.49136	0.60206	0	1.6902	0	0	1.11394	0	0	1.47712	2.3962	0	0	0	1.77815	0	0	0	0	1	0	0	0	0	0	0	0.60206	0.90309	2.32634	0.954243	2	2.54158	3.28981	1.07918
8893-3	8893	8893-3	0	0.60206	0	0	0	0	1.43136	2.70329	0.845098	1.23045	1.14613	1	2.56937	1.50515	0	0.477121	1.11394	0	0	1.04139	0	0	1.44716	2.48572	0	0	0	1.72428	0	0	0	0	0	0	0	0	0	0	0.69897	0.954243	1.11394	2.58659	1.32222	2.1959	2.83187	3.53706	1.20412
8894-3	8894	8894-3	0	0	0	0	0	0	0	2.57403	0	1.32222	1.25527	0.477121	2.61066	1.49136	0.60206	0	1.07918	0	0	0	0	0	0	1.23045	1.54407	0	0	1.41497	0	0	0	0	0	0	0	0	0	0	0.60206	0	0.69897	2.49969	1.07918	2.21219	2.7767	3.53908	1.59106
8894-1	8894	8894-1	1.11394	0.90309	0	0	0	0	0.90309	3.1726	0	1.07918	1.11394	0	2.21219	1.14613	0.477121	0	1.32222	0	0	0	0	0	0.845098	1.17609	1.94939	0	0	0	0.477121	0	0	0	0	0	0	0	0	0	0	0	1.17609	2.10037	0.69897	1.94939	2.69197	3.38093	0.69897
8894-2	8894	8894-2	0.845098	1.25527	0	0	0	0	1.27875	2.98767	0.60206	1.27875	1	0	2.28556	1.25527	0.60206	0	1.54407	0	0	0	0	0	1.11394	1.30103	1.90849	0	0	1.4624	0	0	0	0	0.60206	0	0	0	0	0	1.07918	0	0	2.32015	1.17609	1.9345	2.55991	3.3296	1.11394
8896-3	8896	8896-3	0.30103	0	0	0	0	0	0.477121	3.00475	0	1.49136	1.17609	0	2.38917	0.954243	0.60206	0	1.34242	0	0	0	0	0	0.477121	0	1.88081	0	0	0	0	0	0	0	0	0	0	0	0	0	0.477121	0	0	2.26951	0.90309	1.91908	2.66558	3.44122	0.778151
8896-1	8896	8896-1	0.954243	0	0	0	0	0	0.69897	3.1284	0.90309	1.20412	0.60206	0	2.26717	1.11394	0.954243	0	1.43136	0	0	0	0	0	1.36173	0	1.5563	0	0	1.17609	0	0	0	0	0	0	0	0	0	0	0	0	0.69897	2.03342	0.69897	1.5563	2.69373	3.33885	1.14613
8896-2	8896	8896-2	1.25527	0.60206	0	0	0	0	1.14613	3.00475	0	1.07918	0.60206	0.477121	2.08636	0.90309	0.954243	0	1.5682	0	0	0	0	0	1.36173	0	1.63347	0	0	0	0	0	0	0	0	0	0	0	0	1.11394	0	0	0.60206	1.88649	1.14613	1.86332	2.45788	3.25696	0.30103
8897-2	8897	8897-2	1.17609	1.11394	0	0	0	0	1.27875	3.12969	0.954243	1.32222	1.07918	0.90309	2.33244	1.34242	0.778151	0	1	0	0	0	0	0	1.51851	0.778151	2.03743	0	0	1.04139	0	0	0	0.69897	0	0	0	0	0.30103	0	0.778151	0	0.60206	2.02119	1.07918	1.9345	2.734	3.44747	0.845098
8897-1	8897	8897-1	0	0	0	0	0	0	0.90309	2.71517	0.60206	1.44716	1	1.07918	2.51851	1.38021	0	0	1.07918	0	0	0	0	0	1.27875	0.90309	1.44716	0	0	1.20412	0	0.69897	0	1.07918	0	0	0	0	0	0	0.477121	0.69897	1.07918	2.16435	0.778151	2.12385	2.89927	3.53706	1.20412
8897-3	8897	8897-3	0.30103	0.60206	0	0	0	0	1.25527	2.80686	0	1.17609	1.14613	0.90309	2.63043	1.14613	0	0	1.17609	0	0	0	0	0	1.11394	0	1.32222	0	0.69897	0.954243	0	0	0	1.07918	0	0	0	0	0	0	0	0.778151	1.07918	2.29003	1.17609	2.23805	2.96942	3.67413	1.47712
8898-3	8898	8898-3	0.30103	0	0	0	0	0	0	2.83251	0	1.20412	1.07918	0.778151	2.60853	1.53148	0	0	1.27875	0	0	0	0	0	1.04139	1.07918	1.49136	0	0	0	0	0	0	0	0	0	0	0	0	0.477121	1.07918	0.69897	1.14613	2.48001	0.845098	2.233	2.61278	3.56324	1.54407
8898-1	8898	8898-1	0.60206	0.845098	0	0	0	0	0.954243	3.33143	0	1.39794	1.04139	1	2.61066	1.64345	0	0	1.51851	0	0	0	0	0.778151	1.27875	1.14613	1.75587	0	0	1.38021	0	0	0	0.69897	0	0	0	0	0	0	0.845098	0.90309	1.11394	2.37658	1.11394	2.15836	2.76864	3.62418	1.47712
8898-2	8898	8898-2	1	0.477121	0	0	0	0	1.04139	3.21906	0.30103	1.32222	1.17609	0.69897	2.30103	1.07918	0.90309	0	1.30103	0	0	0	0	0	1.30103	0	1.6721	0	0	1	0	0	0	0	0	0	0	0	0	0	0	0.69897	0.477121	2.30535	0.477121	1.8451	2.45939	3.40552	1.17609
8899-1	8899	8899-1	1.20412	0	0	0	0	0	0	3.21617	0	1.04139	1.04139	0.477121	2.33445	0.69897	0	0	1.07918	0	0	0	0	0	1.14613	0	1.86923	0	0	0.69897	0	0	0	0	0	0	0	0	0	0	0	0.477121	0	2.05308	1	1.82607	2.77012	3.4062	0.90309
8899-2	8899	8899-2	0	0.778151	0	0	0.477121	0	0.69897	3.16584	0	1.32222	0.69897	0.845098	2.20412	0.90309	0.778151	0	1.44716	0	0	0	0	0	1.17609	0	1.62325	0	0	0	0	0	0	0	0	0	0	0	0	0	0	0	0	2.1038	0.778151	1.74819	2.57864	3.33686	1.17609
8899-3	8899	8899-3	0.69897	0.60206	0	0	0	0.90309	0.477121	3.16702	0	1.07918	1.25527	0	2.40993	1.14613	0	0	1.30103	0	0	0	0	0	1.47712	0	1.92428	0	0	1.36173	0	0	0	0	0	0	0	0	0	0	0	0	0.954243	2.0607	1.07918	1.96379	2.60314	3.40976	1.17609
8900-1	8900	8900-1	0	0	0	0	0	0	0	2.74974	0	1.30103	0	0	2.45637	1.47712	0	0	1.07918	0	0	0	0.30103	0	1.20412	0	0	0.30103	0	1.17609	0	0	0	0	0	0	0	0	0	0	1.04139	0	1.27875	2.19033	1.07918	2.04922	2.7574	3.55618	1.11394
8900-3	8900	8900-3	1.23045	0.954243	0	0	0	0	0.845098	3.11826	0	1.30103	1.20412	0	2.27416	1.27875	1.04139	0	1.43136	0	0	0	0	0	1.11394	1.17609	2.09691	0	0	1.14613	0	0	0	0	0	0	0	0	0	0	0	0.69897	0	2.08991	0.60206	1.96848	2.41664	3.38899	1.17609
8900-2	8900	8900-2	1.07918	1.04139	0	0	0	0	1.04139	3.17202	0	1.36173	0.954243	0	2.39445	1.07918	0.845098	0	1.38021	0	0	0	0	0	1.34242	0.954243	2.02938	0	0	0.954243	0	0	0	0	0.778151	0	0	0	0	0	0	1.20412	0.69897	2.06819	1.07918	1.74819	2.53908	3.43473	0.69897
8901-3	8901	8901-3	0	0	0	0	0	0	1	3.05538	1.07918	1.04139	1.36173	0	2.64246	1.49136	0.90309	0	1.27875	0	0	0	0	0	1.50515	0	1.91381	0	0	1.34242	0	0	0	0	0	0	0	0	0	0	0.845098	0.845098	1.14613	2.4014	1.04139	2.26951	2.935	3.71416	1.5682
8901-2	8901	8901-2	1.60206	1.36173	0	0	0.90309	0.477121	1.49136	3.14019	1.32222	1.4624	0.90309	0.90309	0	0	1.92942	1.65321	2.58206	0	1.36173	0.30103	0.845098	0	2.27875	2.67394	1.57978	0.954243	0.778151	2.04532	1.17609	0.845098	0.778151	0.60206	0.954243	1.30103	0.90309	1.23045	1.78533	0	1.79239	1.64345	0.30103	2.26482	1.17609	1.72428	2.76418	3.1726	0.90309
8901-1	8901	8901-1	1.27875	0.477121	0	0	0	0	1.04139	3.06483	0	1.38021	1.20412	0	2.37107	1.27875	0	0.90309	1.20412	0	0	0	0	0	1.54407	1.17609	1.93952	0	0	1	0	0	0	0	0	0	0	0	0	0	0.954243	0	1	2.14301	1	2.09342	2.65801	3.51095	1.14613
8902-1	8902	8902-1	0.60206	1.07918	0	1	0	0	1.50515	2.96614	1	1.39794	1.43136	0	2.35411	0.954243	0	0	1.73239	0	0	0.778151	0	0	1.41497	1.34242	1.93952	0	0.477121	1.25527	0	0	0	0	0	0	0	0	0	0	0	0.845098	1.07918	2.47712	1.23045	2.1959	2.71012	3.4283	1.39794
8902-2	8902	8902-2	1	0.90309	0	0	0	0	1.27875	2.98498	0	1.32222	1.04139	0	2.29885	0.69897	0.845098	0	1.44716	0	0	0	0	0	1.23045	0	1.90309	0	0	1	0	0	0	0	0	0	0	0	0	0	0	0	0	2.29885	1.27875	1.8451	2.41996	3.344	1.07918
8902-3	8902	8902-3	0.778151	0.845098	0	0.60206	0	0	1.34242	2.99344	0.477121	0.954243	1.14613	0	2.27184	1.17609	0.954243	0	1.57978	0	0	0	0	0	1.43136	0	2.13033	0	0	1.17609	0	0	0	0	0	0	0	0	0	0	0	0	0	2.25527	0	1.89763	2.53275	3.32879	0.845098
8903-2	8903	8903-2	1	0.954243	0	0	0	0	0	3.15076	0	1.27875	0	1	2.15534	1.20412	0	0	1.20412	0	0	0	0	0	1.07918	0	1.82607	0	0	0.845098	0	0	0	0	0	0	0	0	0.477121	0	0.778151	1	0	2.26007	0.30103	1.79934	2.69897	3.43473	1.27875
8903-1	8903	8903-1	0	0	0	0	0	0	0.60206	2.84572	0.845098	1.30103	0.845098	0.69897	2.59218	1.49136	0.69897	0	1.11394	0	0	0	0	0	1.4624	0	1.5563	0	0	1.04139	0	0	0	0	0	0	0	0	0	0	1.04139	0.778151	1	2.3483	1	2.15534	2.89154	3.60767	1.4624
8903-3	8903	8903-3	0	0	0	0	0	0	0	2.75587	0.845098	1	0.845098	0.90309	2.61805	1.34242	1	0	1.50515	0	0	0	0	0	1.23045	0	0	0	0	0.90309	0	0	0	0.477121	0	0	0	0	0	0	0.845098	0	0.954243	2.43933	0.954243	2.33244	2.72263	3.56062	1.41497
8904-3	8904	8904-3	0	0	0	0	0	0	0	2.72263	0.778151	1.34242	0	0.69897	2.58659	1.59106	0	0	1.25527	0	0	0	0	0	1.04139	0	1.47712	0	0	1.04139	0	0	0	0	0	0	0	0	0	0	1.07918	0	1.17609	2.39794	0.69897	2.04139	2.67943	3.64424	1.44716
8904-1	8904	8904-1	0.69897	0.69897	0	0	0	0	1.23045	3.10209	0	1.38021	0	0.60206	2.3032	0.90309	0	0	1.41497	0	0	0	0	0	1.34242	1.53148	2.10721	0	0	1.27875	0	0	0	0	1.04139	0	0	0	0	0.60206	0	0	0.954243	2.21219	0.69897	2.08636	2.58092	3.32634	1.17609
8904-2	8904	8904-2	1.30103	0.69897	0	0	0	0	1.11394	3.20085	0	1.11394	0.778151	0.778151	2.29667	0	0.778151	0	1.47712	0	0	0	0	0	1.30103	0	1.98227	0	0	0.845098	0	0	0	0	0	0	0	0	0	0	0.845098	0	0.60206	2.05308	0	2.03743	2.47276	3.38775	1.23045
8905-3	8905	8905-3	0	0	0	0	0	0	0.60206	2.84634	0	0.778151	1.11394	0.954243	2.64147	1.47712	0.477121	0	1.25527	0	0	0	0	0	1.07918	0	1.4624	0	0	0	0	0	0	0	0	0	0	0	0	0	1.17609	1.07918	1.17609	2.26717	0.954243	2.00432	2.75358	3.66633	1.62325
8905-1	8905	8905-1	0.90309	0.90309	0	0	0	0	0	3.1313	0.477121	1.25527	1.14613	0	2.3075	1.59106	0.778151	0.778151	1.39794	0	0	0	0	0	1.39794	0	1.74819	0	0	1.04139	0	0	0	0	0	0	0	0	0	0	0.477121	0	1.04139	2.0569	1	1.91908	2.79796	3.4221	1.23045
8905-2	8905	8905-2	1.17609	0.778151	0	0	0	0	0.845098	3.15168	0.30103	1.43136	1.11394	0	2.36549	1.27875	0.778151	0	1.32222	0	0	0	0	0	1.32222	1.11394	1.77815	0	0	0	0	0	0	0.69897	0	0	0	0	0	0	0	0	1.07918	2.0607	1.14613	1.9345	2.52892	3.40364	1.17609
8907-2	8907	8907-2	0.778151	0.30103	0	0.477121	0	0	1.04139	3.07482	0	1.4624	0.477121	0	2.40483	1.39794	0.778151	0	1.27875	0	0	0	0	0	0.954243	0	1.716	0	0	1.04139	0	0	0	0	0	0	0	0	0	0	0	0	0.60206	1.98227	1.17609	1.99564	2.46687	3.42423	1.14613
8907-1	8907	8907-1	1.23045	1	0	0	0	0	0.954243	3.12189	0	1.27875	0.477121	0.477121	2.25768	1.36173	0.778151	0	1	0	0	0	0	0	1.34242	0.90309	1.79239	0	0	0	0	0	0	0	0	0	0	0	0	0	0.778151	0	0.60206	1.86332	0.90309	1.83251	2.46982	3.39498	0.90309
8907-3	8907	8907-3	0.30103	1	0	0	0	0	0.845098	2.86864	0.778151	1	1.17609	0.845098	2.63649	1.62325	0	0	1	0	0	0	0	0.69897	1.4624	1.11394	0	0	0	1.04139	0	0.69897	0	0	0	0	0	0	0	0	1.34242	0.90309	1.44716	2.23045	1.14613	2.11727	2.46835	3.64807	1.38021
8908-3	8908	8908-3	0	0	0	0	0	0	1.17609	2.82543	1	1.4624	1.44716	1	2.59218	1.54407	1.11394	0	1.34242	0	0	0	0.60206	0	0	1.36173	0	0	0	1.36173	0	0	0	0	0	0	0	0	0	0	0.30103	0.477121	0	2.60746	1.34242	2.17319	2.80821	3.58726	1.50515
8908-1	8908	8908-1	0	0	0	0	0	0	0.477121	2.72099	0	1.27875	0.60206	0	2.45179	1.23045	0.60206	0	1.25527	0	0	0	0	0	1.32222	0	1.34242	0	0	1.20412	0	0	0	0	0	0	0	0	0	0	1.07918	0.954243	1.23045	2.38202	0.90309	2.14922	2.83696	3.60314	1.47712
8908-2	8908	8908-2	1.04139	0.845098	0	0	0	0	1.17609	3.05918	0.60206	1.20412	1.07918	0.477121	2.21484	1.11394	0	0	1.4624	0	0	0	0	0	1.32222	0	1.6902	0	0	1.07918	0.845098	0	0	0	0	0	0	0	0	0	0	0	0	2.02119	0.778151	1.79239	2.43136	3.34025	0.954243
8909-1	8909	8909-1	0.477121	0	0	0	0	0	1.20412	3.23096	0.30103	1.54407	1.04139	0.30103	2.35411	1.14613	0	0	1.44716	0	0	0	0	0	1.50515	0	1.83885	0	0	0	0	0	0	0	0	0	0	0	0	0	0	0	0	2.23805	1.34242	1.83251	2.77452	3.40671	1
8909-2	8909	8909-2	1.14613	1.04139	0	0.30103	0.845098	0	0.845098	3.21112	0	1.30103	0.60206	0	2.35793	1.25527	0.90309	0	1.47712	0	0	0	0.845098	0	1	0	1.83251	0	0	0.954243	0	0	0	0	0	0	0	0	0	0	0.60206	0	0	2.17609	0.60206	1.74819	2.58206	3.40346	0.90309
8909-3	8909	8909-3	0.477121	1.25527	0	0	0	0	0.90309	2.91222	0	1.04139	0.60206	0.69897	2.15534	0.954243	1.04139	0	1.50515	0	0	0	0	0	0.845098	0	2.07188	0	0	1.20412	0	0	0	0	0	0	0	0	0	0	0	0.60206	0	2.12057	0.477121	1.78533	2.41497	3.17869	1
8911-1	8911	8911-1	0.69897	0	0	0	0	0	0.69897	3.19811	0	1.41497	1.04139	0	2.25285	1.17609	0.60206	0	1.30103	0	0	0	0	0	1.38021	0	1.79934	0	0	1.04139	0	0	0	0	0	0	0	0	0	0	0.778151	0.954243	1	2.11394	0.845098	1.77085	2.71684	3.41246	1.11394
8911-2	8911	8911-2	0.60206	0	0	0	0	0.30103	0.90309	3.11926	0	0.954243	1.27875	0.69897	2.40993	1.32222	0	0	1.39794	0	0	0	0	0	0.778151	1.04139	1.83251	0	0	0	0	0	0	0	0	0	0	0	0	0	0.30103	0	0.69897	2.30963	1	2.03342	2.61595	3.39023	0.90309
8911-3	8911	8911-3	0	0.778151	0	0	0	0	1.25527	2.42651	0.954243	1.14613	1.07918	0.778151	2.61805	1.74036	1.04139	0	1.27875	0	0	0	0	0	1.14613	1.39794	0.778151	0	0	1.17609	0.477121	0	0	0	0	0	0	0	0	0	0.477121	0.778151	0.778151	2.5955	1.04139	2.19312	2.79518	3.58001	1.34242
8913-2	8913	8913-2	0	0.90309	0	0.30103	0	0	1.27875	2.59439	0.778151	1.17609	1.36173	0	2.63949	1.27875	0.477121	0.477121	1.34242	0	0	0	0	0.60206	1.23045	1.79934	1.53148	0	0	1.23045	0.778151	0.845098	0	0	0	0	0	0	0	0	0	1.11394	0.954243	2.69548	1.20412	2.17319	2.80956	3.54913	1.36173
8913-3	8913	8913-3	0	0	0	0	0	0	0.60206	2.90849	0.845098	1.11394	1.23045	0	2.60746	1.27875	0	0	1.27875	0	0	0	0.477121	0	1.27875	0	1.78533	0	0	1.04139	0.30103	0	0	0.845098	0	0	0	0	0	0	0.954243	0.90309	0.90309	2.41996	0	2.03342	2.77085	3.6505	1.27875
8913-1	8913	8913-1	0.30103	0.954243	0	0	0	0	1.23045	3.08991	0	1.04139	0	0	1.98227	1.23045	0	0	1.38021	0.69897	0	0	0	0	1.14613	0	1.59106	0	0	0	0	0	0	0	0	0	0	0	0	0	0.60206	0.30103	0.69897	2.12057	0.90309	1.80618	2.52892	3.26975	1.17609
8915-1	8915	8915-1	1.17609	0	0	0	0	0	1.14613	3.2335	1	1.57978	1.27875	0	2.19033	1	0.778151	0	1.65321	0	0	0	0	0	1.54407	0	1.82607	0	0	1.25527	0	0	0	0	0	0.477121	0	0	0	0	0	0.845098	1.07918	2.18469	0.69897	1.87506	2.73159	3.44404	1.17609
8915-2	8915	8915-2	1	0.60206	0	0	0	0	1.20412	2.94101	0	1.17609	1	0.69897	2.37475	1.23045	0	0	1.41497	0	0	0	0	0	1.5563	1.47712	2.04532	0	0	1.04139	0	0	0	0	0.778151	0	0	0	0	0	0	0.60206	1	1.77085	0	1.74036	2.61595	3.34262	0.954243
8915-3	8915	8915-3	0	0	0	0	0	0	1.04139	2.61595	0.954243	1.04139	1.07918	0.69897	2.68034	1.62325	0.477121	0	1.38021	0	0	0	0	0	1.27875	1.96379	1.5563	0	0	1.36173	0	0	0	0	0	0	0	0	0	0	0.69897	0	1.27875	2.47129	1.20412	2.15534	2.902	3.55606	1.17609
8917-1	8917	8917-1	0.30103	0.778151	0	0	0	0	1.07918	3.14208	0	1.20412	1.04139	0	2.60531	1.32222	0.845098	0	1.57978	0	0	0	0	0	1.36173	1.07918	1.86923	0	0	1.25527	0	0	0	0	0	0	0	0	0	0	1	0.845098	1	2.49969	1	2.04922	2.71684	3.53529	1.43136
8917-2	8917	8917-2	1	0.90309	0	0	0	0	0	3.14768	0	1.34242	1.04139	0.60206	2.32838	1.14613	0.954243	0	1.66276	0	0	0	0	0	1.51851	0.954243	1.81291	0	0	0.778151	0	0	0	0	0	0	0	0	0	0	0	0	0.477121	2.09691	0.778151	1.68124	2.52114	3.38721	0.69897
8917-3	8917	8917-3	0	0	0	0	0	0	0.477121	2.97174	0.60206	1.20412	1	0	2.6637	1.69897	0.845098	0.90309	1.36173	0.30103	0	0	0	0	1.20412	1.30103	1.72428	0	0	1.38021	0.778151	0	0	0	0	0	0	0	0	0	1.07918	0.477121	1	2.45939	1.20412	2.22789	2.82478	3.71366	1.51851
8918-2	8918	8918-2	0.477121	0.954243	0	0	0	0	0.845098	3.21352	0.778151	1.47712	0	0	2.35025	1.30103	0.845098	0	1.4624	0	0	0	0	0	1.30103	0	1.69897	0	0.60206	1.17609	0	0	0	0	0	0	0	0	0	0.778151	0	1	0.778151	2.06819	0.60206	1.94448	2.5092	3.39533	1.17609
8918-1	8918	8918-1	0	0	0	0	0	0	0	2.79449	0	1.32222	1	0	2.22272	1.53148	1.07918	0	1.11394	0	0	0	0	0	1.11394	0	1.57978	0	0	0.69897	0	0	0	0	0	0	0	0	0	0	1.17609	0	1.32222	2.19312	1.07918	2.00432	2.52763	3.48756	1.14613
8918-3	8918	8918-3	0	0	0	0	0.90309	0	0	2.84136	0	1.23045	1.25527	0.60206	2.63347	1.60206	1.14613	0	1.43136	0	0	0	0	0	0	0.845098	1.51851	0	0	1.25527	0	0	0	0	0	0	0	0	0	0	0.90309	0.477121	1.25527	2.40654	0.69897	1.97313	2.84819	3.67733	1.54407
8919-3	8919	8919-3	1.20412	1.32222	0	0.60206	0	0.30103	1.17609	3.02572	0	1.34242	1.07918	0	2.33846	1.07918	0.845098	0	1.57978	0	0	0	0	0	0.60206	0.954243	1.99123	0	0	1.20412	0	0	0	0	0	0	0	0	0	0	0	0	0	2.19866	0.69897	1.91908	2.55388	3.35889	1.20412
8919-2	8919	8919-2	1.14613	0.90309	0	0	0	0	0.90309	3.14114	0	1.25527	1.20412	0	2.33646	1.20412	1	0	1.43136	0	0	0	0	0	1.14613	0.954243	1.82607	0	0	0	0	0	0	0	0	0	0	0	0	0	0	0	0.845098	2.27646	0.778151	1.89209	2.66932	3.37822	0.954243
8919-1	8919	8919-1	1.04139	1	0	0	0	0	1.34242	2.99167	0.60206	1.39794	1	0.60206	2.35603	1.39794	0	0	1.6721	0	0.477121	0	0	0	1.41497	1.30103	2	0.845098	0	1.25527	0.778151	0	0	0	0.954243	0	0	0	0	0	0	1.07918	0.954243	2.36173	1.25527	2.1038	2.6149	3.34282	1
8920-2	8920	8920-2	1.14613	0.778151	0	0	0	0	0.845098	3.12189	0	1.47712	1	0	2.34635	0.954243	0.845098	0.477121	1.34242	0	0	0	0	0	1.20412	0	2.00432	0	0	0	0	0	0	0	0	0	0	0	0	0	0.60206	0	1	2.09691	0.69897	1.91908	2.29885	3.34104	1.14613
8920-1	8920	8920-1	1.17609	0.69897	0	0	0	0	1	3.33546	0	1.63347	1.25527	0	2.43775	1.14613	1.11394	0	1.25527	0	0	0	0	0	1.53148	0	2.19312	0	0	1.20412	0	0	0	0	0	0	0	0	0	0	1.07918	0	1	2.16732	0.778151	1.97313	2.5832	3.43807	1.20412
8920-3	8920	8920-3	0	0.845098	0	0	0	0	0.845098	2.90849	0	0.477121	1.04139	1	2.19033	1.14613	0.90309	0	1.30103	0	0	0	0	0	0	0	1.91908	0	0	1.27875	0	0	0	0	0	0	0	0	0	0	1.50515	0.60206	1.20412	2.28103	1.38021	2.14301	2.40312	3.65283	1.49136
8922-3	8922	8922-3	0	0.477121	0	0	0	0	0	3.00689	0	1.32222	1.07918	1.07918	2.45484	1.44716	0.30103	0	1.36173	0	0	0	0	0	1.20412	0	1.63347	0	0	1.17609	0	0	0	0	0	0	0	0	0	0	0	0	0.778151	2.07188	1.25527	2.00432	2.57171	3.55799	1.20412
8922-1	8922	8922-1	1.23045	1.04139	0	0	0	0	1.27875	3.19005	0.69897	1.25527	0.845098	0	2.40312	1.25527	0	0	1.43136	0	0	0	0	0	1.50515	1.07918	1.76343	0	0	0.60206	0	0	0	0	0	0	0	0	0	0	0	1	1.11394	2.13672	0.845098	1.96379	2.78247	3.4612	0.90309
8922-2	8922	8922-2	0.90309	1.27875	0	0	0	0	1.38021	3.17898	0.477121	1.34242	1	0	2.30535	1.20412	0.69897	0.90309	1.4624	0	0	0	0	0	1.38021	0	1.74819	0	0	0	0	0	0	0	0	0	0	0	0	0.69897	0	0	1.04139	2.07188	0.90309	1.79239	2.62118	3.45025	1.07918
8924-1	8924	8924-1	0.69897	1.04139	0	0	0	0	1.25527	3.06333	0.90309	1.47712	0.90309	1.23045	2.40824	1	0	0	1.50515	0	0	0	0	0	1	1.20412	1.83885	0	0	1.20412	0	0	0	0	0	0	0	0	0	0	0	0	0.69897	2.29226	0.954243	1.97772	2.57287	3.3294	1.17609
8924-2	8924	8924-2	1	1	0	0	0	0	1.07918	3.09968	0	1.20412	0.845098	0.954243	2.26717	1	0	0	1.49136	0	0	0	0	0	1.27875	0	2.02531	0	0	1.07918	0	0	0	0	0	0	0	0	0	0	0	0	0	2.15534	0	1.89763	2.48996	3.37785	0.90309
8924-3	8924	8924-3	0	0.60206	0	0	0.60206	0	1.04139	2.8169	0.954243	1.30103	1.41497	0	2.68664	1.47712	0.69897	0	1.44716	0	0	0	0	0	1	1.54407	1.39794	0	0	1.62325	0	0	0	0	0	0	0	0	0	0.30103	0	0.69897	0.90309	2.48855	1.30103	2.33846	2.89376	3.63175	1.51851
8925-1	8925	8925-1	1.07918	0	0	0	0	0	1.07918	3.2531	0	1.43136	0.60206	0	2.24551	0.90309	1.04139	0	1.44716	0	0	0	0	0	1.27875	0	1.57978	0	0	1.04139	0	0	0	0	0	0	0	0	0	0	0.845098	0.90309	1.20412	2.26482	0.954243	1.76343	2.68574	3.4257	1.27875
8925-2	8925	8925-2	1.04139	1.04139	0	0	0	0.30103	0	3.22376	0	1.4624	0.69897	0	2.09691	1.36173	0.477121	0	1.27875	0	0	0	0	0	1.34242	0	1.4624	0	0	0.954243	0	0	0	0	0	0	0	0	0	0	0.845098	0.90309	1.11394	2.20412	0.778151	1.79934	2.58659	3.39428	1.23045
8925-3	8925	8925-3	1.11394	0.60206	0	0	0	0.477121	0.845098	3.10619	0	1.30103	1.14613	0	2.22531	1.32222	0.845098	0	1.39794	0	0	0	0	0	1.34242	0	1.72428	0	0	0	0	0	0	0	0	0	0	0	0	0	0	0.90309	0.477121	2.04532	0.477121	1.74819	2.40483	3.29314	1.20412
8926-2	8926	8926-2	1.11394	1.07918	0	0	0	0	1.07918	3.20844	0	1.5682	1.36173	0	2.32634	1.04139	1	0	1.44716	0	0	0	0	0	1.36173	0	1.69897	0	0	0.778151	0	0	0	0	0	0	0.477121	0	0	0	0	0	0	2.04139	0.477121	1.77085	2.51851	3.40381	0.845098
8926-3	8926	8926-3	0	0	0	0	0	0	1.49136	2.61172	1	1.50515	1.25527	1.11394	2.617	1.716	0.69897	0	1.47712	0	0	0	0	0	1.20412	1.69897	1.57978	0	0	1.25527	0	0	0	0.69897	0	0	0	0	0	0	0	0.90309	1	2.46538	1.14613	2.22531	2.79588	3.51878	1.27875
8926-1	8926	8926-1	0	0.477121	0	0	0	0	1.23045	3.02694	0.90309	1.25527	0.845098	0.778151	2.4843	1.38021	1.04139	0	1.23045	0	0	0	0	0	1.11394	1.20412	1.85126	0	0	1.25527	0	0	0	0	0	0	0	0	0	0	0.30103	0	0.60206	2.4133	1.20412	2.2833	2.69197	3.4853	1.17609
8928-1	8928	8928-1	0.30103	0.60206	0	0	0	0	0.954243	2.97267	0	1.04139	0.60206	0.477121	2.55751	1.27875	0.90309	0	1.38021	0	0	0	0	0	0.60206	1.20412	1.82607	0	0	0	0	0.778151	0	0	0	0	0	0	0	0	1.14613	0	0.845098	2.40312	1.20412	2.10721	2.83632	3.53135	1.34242
8928-2	8928	8928-2	1.04139	0.954243	0	0	0	0	1.07918	3.11126	0.845098	1.23045	0.778151	0	2.30535	1.07918	0.60206	0	1.41497	0	0	0	0	0	1.4624	0	2.04532	0	0	1.11394	0	0	0	0	0	0	0	0	0	0	0.69897	0	0.778151	2.12057	1.25527	1.81954	2.52114	3.39146	1.25527
8928-3	8928	8928-3	0.477121	0	0	0	0	0	0	2.51455	0	1.14613	1.43136	0.90309	2.68305	1.69897	0.30103	0	1.38021	0.477121	0	0	0.69897	0	1.14613	1.30103	1.59106	0	0	1.72428	0	0	0	0	0	0	0	0	0	0	0	0	0	2.43775	1	2.20683	2.74351	3.5557	1.74819
8930-1	8930	8930-1	1.07918	0.60206	0	0	0	0	1.04139	3.30428	0	1.47712	1.25527	0	2.46687	1.32222	0	0	1.47712	0	0	0	0	0	1.32222	0	1.88081	0	0	0	0	0	0	0	0	0	0	0	0	0	0.954243	0	0.845098	2.19866	1	1.91381	2.73159	3.41731	1.07918
8930-2	8930	8930-2	0.954243	1.07918	0	0	0	0	1.30103	3.07918	0	1.43136	1.14613	0	2.34635	0.90309	0	0	1.57978	0	0	0	0	0	1.36173	0	2.00432	0	0	1.04139	0	0	0	0	0	0	0	0	0	0	0	0.845098	0.69897	2.25042	1	1.87506	2.59329	3.35793	0.954243
8930-3	8930	8930-3	0	0	0	0	0	0	0.954243	3.11428	0.69897	1.43136	0.954243	1.04139	2.72509	1.85126	1.04139	0	1.36173	0	0	0	0	0	1.51851	0	1.66276	0	0	0.60206	0	0	0	0	0	0	0	0	0	0	1.11394	0	0	2.43933	0.954243	2.24797	2.46687	3.6466	1.59106
8931-2	8931	8931-2	0.60206	1.14613	0	0	0	0	1.41497	3.07151	0	1.30103	0.845098	0	2.18469	1.14613	0	0	1.53148	0	0	0	0	0	1.17609	1.20412	1.98677	0	0	0	0	0	0	0	0	0	0	0	0	0	0	0	0	2.40824	0.90309	2.11059	2.6561	3.36847	1.23045
8931-1	8931	8931-1	1	0.69897	0	0	0	0	0	3.22634	0	1.44716	0.778151	0	2.26482	0	0	0	1.63347	0	0	0	0	0	1.27875	0	1.86332	0	0	0	0	0	0	0	0	0	0	0	0	0	0	0	0.954243	2.1038	0.90309	1.50515	2.60097	3.41581	1
8931-3	8931	8931-3	0.778151	1.32222	0	0	0.477121	0	1.23045	3.08884	0	1.25527	1.20412	0	2.4216	1.11394	0.60206	0	1.5563	0	0	0	0	0.30103	1.25527	0	2.15229	0	0	1.23045	0	0	0	0	0	0	0	0	0	0	0	0	0	2.32634	0.90309	1.97313	2.5955	3.3668	1.23045
8932-3	8932	8932-3	0	0	0	0	0	0	0.954243	2.62221	0.778151	1.17609	1.27875	0.90309	2.68485	1.76343	0.477121	0	1.17609	0	0	0	0	0	1.23045	0	1.43136	0	0	0.954243	0.477121	0	0	0	0	0	0	0	0	0	1	0.845098	0.845098	2.57864	1.32222	2.2833	2.60853	3.66436	1.32222
8932-1	8932	8932-1	0.90309	0.60206	0	0	0	0	0.954243	3.17231	0	1.27875	0.845098	0.30103	2.18469	1.23045	0	0	1.34242	0	0	0	0	0	0.778151	0.477121	2.02119	0	0	0.954243	0	0	0	0	0	0	0.30103	0	0	0	0	0	0.60206	2.25042	0.90309	1.94939	2.52763	3.34321	1.11394
8932-2	8932	8932-2	0.477121	0	0	0	0	0	0.778151	3.15776	0.69897	1.44716	0.954243	0	2.54531	1.30103	0.69897	0	1.57978	0	0	0	0	0	1.36173	0	1.54407	0	0	1.20412	0	0.954243	0	0	0	0	0	0	0	0	0.845098	1.14613	0	2.34242	0.90309	1.92942	2.66276	3.50987	1.39794
8933-1	8933	8933-1	1.65321	1.30103	0	0	0	0	1.70757	3.29336	1.44716	1.70757	1.30103	0.60206	1.34242	0	2.08991	1.65321	2.59106	0.69897	1.39794	0	0.778151	0.845098	2.41996	2.7574	1.57978	1.07918	0	2.00432	1.11394	1.17609	0	0	0	1.04139	1.17609	1.50515	2.25527	0	2.03743	1.76343	1.14613	2.04922	0.60206	1.14613	2.02531	2.9952	0.60206
8933-2	8933	8933-2	1.20412	0.30103	0	0	0	0	1	3.15412	0	1.27875	0.90309	0	2.36361	0.477121	0.778151	0	1.43136	0	0	0	0	0	1.07918	0	1.88081	0	0	1.07918	0	0	0	0	0	0	0	0	0	0	0.60206	0.90309	0	2.09691	0.477121	1.90309	2.50786	3.36248	0.954243
8933-3	8933	8933-3	1.83885	1.92428	0	0	0.90309	0.30103	1.62325	3.1186	1.68124	1.62325	1.38021	0.69897	0.69897	0.69897	2.19866	1.88081	2.8739	0	1.78533	0	0	0	2.56937	3.06258	1.97772	0.69897	0.954243	2.19866	1.25527	1.27875	0.845098	0.954243	1.25527	1.23045	0	1.11394	2.4133	0	2.47276	1.86332	0.778151	2.17609	0.845098	1.85126	2.03743	3.04376	1.07918
8934-2	8934	8934-2	0	0	0	0	0	0	1.11394	3.18921	0	1.20412	0.90309	0.477121	2.38561	1.11394	0	0	1.39794	0	0	0	0	0	1.14613	1.11394	2.233	0	0	0	0	0	0	0	0	0	0	0	0	0	0.778151	0.60206	1	2.26951	1.07918	2.11727	2.6561	3.45864	1
8934-1	8934	8934-1	0.90309	0.477121	0	0	0	0	1	3.18752	0	1.41497	0.954243	0.477121	2.30535	1.07918	0	0	1	0	0	0	0	0	1.27875	0.954243	1.97772	0	0	0.845098	0	0	0	0	0	0	0	0	0	0	0	0	0.30103	2.15836	0.778151	1.79934	2.68395	3.28533	1.27875
8934-3	8934	8934-3	0.90309	0	0	0	0	0	0	3.13735	0	1.41497	0.477121	1.14613	2.3784	1.44716	0.778151	0	1.41497	0	0	0	0	0	1.04139	0	1.96379	0	0	0	0	0	0	0	0	0	0	0	0	0	0	0	0	2.08636	0.778151	1.88649	2.44871	3.40278	1.36173
8935-3	8935	8935-3	1.17609	1	0	0	0	0	0.954243	3.06819	0	1.27875	0.954243	0.60206	2.21219	1.14613	0.69897	0	1.36173	0	0	0	0	0	1.44716	0	1.81954	0	0	0.60206	0	0	0	0	0	0	0	0	0	0	0	0	0	2.15229	0.477121	1.85126	2.4014	3.35295	1.11394
8935-1	8935	8935-1	0	0	0	0	0	0	1.07918	3.17143	0.477121	1.36173	0.90309	0	2.37475	1.36173	0.477121	0	1.32222	0	0	0	0	0	1.32222	0	1.70757	0	0	1.14613	0	0	0	0	0	0	0	0	0	0.845098	1.04139	0	1.20412	2.28103	0.778151	2.03743	2.79169	3.4813	1.27875
8935-2	8935	8935-2	1.07918	1	0	0	0	0	0.845098	3.17638	0	1.11394	0.69897	0.30103	2.31597	1.36173	0.778151	0	1.41497	0	0	0	0	0	1.39794	0	1.80618	0	0	0	0	0	0	0	0	0	0	0	0	0	0	0	0.90309	2.25285	0.90309	1.96848	2.67943	3.42651	1
8936-3	8936	8936-3	0.69897	0.30103	0	0	0	0	0	2.72997	0	1.49136	1.07918	0.30103	2.66558	1.78533	0	0	1.27875	0	0	0	0	0	1.30103	0	1.30103	0	0	1.36173	0	1.14613	0	0	0	0	0	0	0	0	1.07918	0.477121	1	2.27416	0.845098	2.15836	2.74896	3.64375	1.62325
8936-2	8936	8936-2	1.11394	0.954243	0	0	0	0	0.90309	3.17782	0.477121	0.90309	0.845098	0	2.23805	1.07918	0.69897	0	1.25527	0	0	0	0	0	1.23045	0	1.96848	0	0	0	0	0	0	0	0	0	0	0	0	0	0	0	0.30103	2.16732	0.778151	1.91908	2.47567	3.38328	1.34242
8936-1	8936	8936-1	0.778151	0.69897	0	0	0	0	1.27875	3.12646	0.60206	1.32222	1.11394	0	2.38561	0.30103	0.60206	0	1.23045	0	0	0	0	0	0.60206	1.20412	2.14613	0	0	0.90309	0.60206	0	0	0	0.30103	0	0	0	0	0	0.954243	0.477121	0.954243	2.34439	1.38021	2.02531	2.47276	3.34713	1.25527
8937-3	8937	8937-3	0	0	0	0	0	0	0.90309	2.68931	0.60206	1.30103	0.90309	1	2.72016	1.39794	1.07918	0	1.20412	0	0	0	0	0	1.17609	0	1.32222	0	0	1.23045	0	0	0	0	0	0	0	0	0	0	0.954243	0.778151	1.11394	2.4609	1.27875	2.36361	2.92788	3.68476	1.61278
8937-2	8937	8937-2	0.477121	0.778151	0	0	0	0	0.69897	3.02857	0	1.27875	0.778151	0	2.10037	0.60206	0.845098	0	1.39794	0	0	0	0	0	1.39794	0	1.60206	0	0	0	0	0	0	0	0	0	0	0	0	0	0	0	0.477121	2.13354	0.69897	1.83885	2.48572	3.26788	1.04139
8937-1	8937	8937-1	0.60206	1	0	0	0	0	1.17609	2.8848	0	1.25527	1.25527	0	2.34044	1	0	0	1.39794	0.778151	0	0	0	0	1.17609	1.61278	1.98227	0	0	1.20412	0	0	0	0	0.845098	0	0	0.30103	0	0.845098	0	0.477121	0.90309	2.36736	1.23045	2.02119	2.63949	3.26435	1.14613
8938-1	8938	8938-1	0.60206	0	0	0	0	0	0	2.90849	0.477121	1.30103	0.90309	0.60206	2.32015	1.39794	0.778151	0	1.38021	0	0	0	0	0	1.32222	1.20412	1.97313	0	0	0	0.30103	0	0	0	0	0	0	0	0	0	0.69897	0.845098	0	2.24797	1.17609	1.91908	2.53275	3.35392	1.04139
8938-2	8938	8938-2	1.17609	0.69897	0	0	0.477121	0	1.11394	2.95424	0	1.34242	1.04139	0.845098	2.3075	1.32222	0.954243	0	1.43136	0	0	0	0	0	1.43136	0	2.07918	0	0	0.778151	0	0	0	0	0	0	0	0	0	0	0	0	0	2.21748	0.778151	1.94448	2.48144	3.32118	1.04139
8938-3	8938	8938-3	0	0	0	0	0	0.778151	0	2.71012	0	1.04139	0	1	2.53275	1.78533	0.954243	0	1.23045	0	0	0	0	0	1.14613	0	1.20412	0	0	0.954243	0.778151	0	0	0	0	0	0	0	0	0	0.845098	0	0.845098	2.25527	1	2.01703	2.69984	3.60401	1.41497
8939-2	8939	8939-2	0.69897	0.69897	0	0	0.60206	0	1.11394	3.12775	0	1.38021	1.07918	1.20412	2.35603	1.17609	0.778151	0	1.4624	0	0	0	0	0	1.17609	0	2.03743	0	0	0	0	0	0	0	0	0	0	0	0	0	0.778151	0.778151	0.845098	2.14922	1.14613	1.82607	2.57634	3.37125	1
8939-1	8939	8939-1	1.04139	0.69897	0	0	0	0	1.50515	2.82282	0	1.25527	1	0	2.46538	1.44716	0.477121	0	1.6902	0	0	0	0	0	1.38021	1.57978	2.02531	0	0	1.25527	0	0	0	0	0.845098	0	0	0	0	0	0	0	0.954243	2.48855	0.954243	2.29226	2.81954	3.45667	1.11394
8939-3	8939	8939-3	0.477121	0.90309	0	0	0	0	1.07918	3.0465	0.477121	1.32222	0.778151	0.954243	2.26245	1.36173	0.845098	0	1.38021	0	0	0	0	0	1.14613	1.38021	2	0	0	0	0	0	0	0	0	0	0	0	0	0	0.845098	0.30103	0	2.12057	1.04139	1.95904	2.47422	3.36267	1.17609
8940-3	8940	8940-3	0	0	0	0	0	0	0.778151	2.65418	0.90309	1.41497	1.53148	1.27875	2.70243	1.54407	0.69897	0.60206	1.23045	0	0	0	0.60206	0	1.25527	1.63347	0	0	0	1.36173	0.845098	0	0	0	0	0	0	0	0	0	0	0.845098	0.69897	2.60853	1.38021	2.35025	2.77743	3.64018	1.66276
8940-1	8940	8940-1	0.954243	0.69897	0	0	0	0	1.07918	3.21722	0	1.27875	1.11394	0.30103	2.41162	1.38021	1.04139	0	1.5682	0	0	0	0	0	1.30103	0	1.96379	0	0	0	0	0	0	0	0	0	0	0	0	0	0	0.60206	0	2.25768	0.60206	2.0569	2.62221	3.4484	1.11394
8940-2	8940	8940-2	0.90309	0.477121	0	0	0	0	0.954243	3.11126	0	1.20412	1.11394	0	2.21748	1.34242	0.90309	0.477121	1.43136	0	0	0	0	0	0.845098	0	1.98677	0	0	0	0	0	0	0	0	0	0	0	0	0	0.778151	0.845098	0.60206	2.24304	0.69897	1.88081	2.61805	3.41313	0.845098
8941-3	8941	8941-3	0.30103	1.07918	0	0	0	0	1	3.12123	0	1.39794	0.90309	0.69897	2.23805	1.04139	0	0	1.34242	0	0	0	0	0	1.36173	0	1.90849	0	0	0.845098	0	0.30103	0	0	0	0	0	0	0	0	0.90309	1	0.845098	2.18469	1.07918	1.88081	2.69548	3.37931	0.845098
8941-1	8941	8941-1	0	0.477121	0	0	0	0	1.07918	2.8893	0.954243	1.50515	1.27875	0	2.4216	1.23045	0.69897	0	1.36173	0	0	0	0	0	1.60206	1.17609	2.05308	0	0	0	0	0	0	0	0	0	0	0	0	0	0.778151	1.07918	0.845098	2.35793	1.20412	2.15534	2.67943	3.45637	0.954243
8941-2	8941	8941-2	0.69897	0	0	0	0	0	1.38021	3.05843	1	1.50515	1.30103	0.60206	2.38202	1	0.69897	0.90309	1.60206	0	0	0	0	0	1.50515	0	2.07918	0	0	1.30103	0	0	0	0	0	0	0	0	0	0	0.954243	0	0	2.28556	1.23045	2.09342	2.64246	3.43377	1.38021
8942-2	8942	8942-2	1	1.14613	0	0	0	0	0	3.03981	0	1.34242	1.07918	1	2.18752	1.07918	0.477121	0	1.17609	0	0	0	0	0	1.27875	0	2.00432	0	0	0.477121	0	0	0	0	0	0	0	0	0	0	0.30103	0.845098	0	2.08279	0	1.93952	2.35218	3.38489	1.07918
8942-1	8942	8942-1	0.60206	0.60206	0	0	0.60206	0	1.70757	2.86923	1.23045	1.49136	0	0	1.72428	0	1.27875	0	2.01284	0	0	0	1.59106	0	1.75587	2.49693	1.78533	0	0	2.0086	0	1.34242	0	2.07918	0.30103	0	1.07918	0.90309	0	0	0	1.20412	1.32222	2.08991	1.14613	1.95904	2.43136	3.07188	0.845098
8942-3	8942	8942-3	0.69897	0.778151	0	0	0	0	1.36173	2.88024	0.69897	1.47712	1.07918	0	2.45179	1.47712	0	0.477121	1.43136	0	0	0	0	0	1.54407	1.83251	1.69897	0	0	1.49136	0	1.14613	0	0.90309	0	0	0	0	0	0	0.60206	0.69897	1.11394	2.47712	0.954243	2.15229	2.66932	3.46997	1.20412
8945-3	8945	8945-3	0.69897	0.90309	0	0	0	0	0.90309	3.17782	0	1.30103	1.04139	0	2.27184	0.845098	0	0	1.17609	0	0	0	0	0	1.38021	1	1.86923	0	0	0.60206	0	0	0	0	0	0	0	0	0	0	0	0.778151	0	2.15229	1	2.03342	2.50243	3.40002	1.20412
8945-1	8945	8945-1	0.845098	0.90309	0	0	0	0	1	3.37254	0.845098	1.43136	1.23045	0.69897	2.34635	1.04139	0	0	1.38021	0	0	0	0	0	1.44716	0	2.0086	0	0	0	0	0	0	0	0	0	0	0	0	0.477121	0	0	0.90309	2.20683	1.23045	1.86923	2.62839	3.50311	1.44716
8945-2	8945	8945-2	1.07918	0.845098	0	0	0.30103	0.845098	1.04139	3.17811	0	1.39794	1	0	2.30103	1.44716	0.30103	0.60206	1.36173	0	0	0	0	0	1.41497	1.07918	2.04139	0	0	0.778151	0	0	0	0	0	0	0	0	0	0	0	0	0.30103	2.20412	1.04139	2.08991	2.5302	3.42062	1.14613
8947-1	8947	8947-1	0.845098	0	0	0	0.30103	0	0	3.24477	0.30103	1.20412	0.90309	0.30103	2.20683	1.20412	0	0	1.20412	0	0	0	0	0	1.23045	0	1.61278	0	0	0.60206	0	0	0.69897	0	0	0	0	0	0	0.477121	0	0	0.69897	2.16137	0.778151	1.93952	2.69984	3.34439	0
8947-2	8947	8947-2	0.954243	1.04139	0	0	0	0	1.20412	2.95279	0.69897	1.11394	0.90309	0.845098	2.35218	0.845098	0	0	1.27875	0.30103	0	0	0	0	0.954243	0	2.04532	0	0	0.954243	0	0	0	0	0	0	0	0	0	0	0	0	0	2.22011	0.778151	1.64345	2.31597	3.27669	1.07918
8947-3	8947	8947-3	0.778151	1.65321	0	0	1.32222	1.11394	1.88649	2.49831	2.14613	2.02531	1.90309	1.51851	1.70757	1.23045	1.9345	2.13354	2.34635	1.34242	1.95904	0	1.07918	0.954243	2.52634	3.2982	1.86332	0	1.47712	2.44716	1.92428	1.78533	1.49136	1.25527	1.54407	0	1.36173	0	0.69897	0	3.24748	1.78533	1.86923	2.33041	1.20412	2.0607	1.5563	3.23754	1.39794
8948-1	8948	8948-1	1.20412	0.477121	0	0	0	0	0.477121	3.09482	0	1.14613	0.30103	0.30103	2.1959	0.90309	0.90309	0	1.39794	0	0	0	0	0	1.07918	1	1.62325	0	0	0.845098	0	0	0	0	0	0	0	0	0	0	0	0.778151	0	2.16435	0.90309	1.90849	2.62839	3.33244	1.30103
8948-2	8948	8948-2	0	1.04139	0	0	0	0	0.69897	2.92169	0	1.27875	1	0.778151	2.55388	1.14613	0.477121	0.69897	1.25527	0	0	0	0	0	1.17609	1.11394	1.60206	0	0	1.23045	0.30103	0	0	0	0	0	0	0	0	0	0.90309	0.954243	0.477121	2.32015	1.27875	2.12385	2.88252	3.57875	1.30103
8948-3	8948	8948-3	0	0	0	0	0	0	1.17609	2.52634	0.60206	1.14613	1.14613	1.04139	2.65128	1.4624	0.60206	0.477121	1.23045	0	0	0	0	0	1.07918	1.49136	1.34242	0	0	1.47712	0.69897	0	0	0	0.477121	0	0	0	0	0	0	0	0	2.37291	1.25527	2.20683	2.80821	3.55727	1.50515
8949-2	8949	8949-2	1	1.23045	0	0	0	0	0	3.18099	0	1.14613	0.778151	0.69897	2.29667	1.36173	0.477121	0	1.4624	0	0	0	0	0	1.34242	0	1.79934	0	0	0	0	0	0	0	0	0	0	0	0	0	0	0	0.778151	2.1271	1	1.85733	2.57403	3.37273	1.04139
8949-3	8949	8949-3	0	0.477121	0	0	0	0	1.27875	2.5682	0.477121	1	1.11394	1.07918	2.60531	1.53148	0.69897	0.69897	1.23045	0	0	0	0	0	1.34242	1.30103	0	0	0	1.38021	0	0	0	0	0	0	0	0	0	0	0.90309	0.60206	0	2.44404	1.07918	2.2878	2.66276	3.57089	1.41497
8949-1	8949	8949-1	0	0.477121	0	0	0	0	0.954243	2.69984	0.778151	1.51851	1.14613	0	2.71181	1.77815	0.60206	0	1.11394	0	0	0	0	0	1.20412	1.11394	1.50515	0	0	1.23045	0.60206	0	0	0	0	0	0	0	0	0	0.477121	0.778151	1.14613	2.44248	1.20412	2.27416	2.69461	3.59748	1.34242
8950-1	8950	8950-1	0.477121	0	0	0	0	0	1.41497	3.02078	0	1.27875	1.17609	0.477121	2.41664	1.44716	0	0	1.50515	0	0	0	0	0	1.30103	1.38021	1.99564	0	0	0.90309	0	0	0	0	0	0	0	0	0	0	0	0.60206	0	2.25527	0.778151	1.94939	2.68842	3.34282	1
8950-2	8950	8950-2	1.11394	1.07918	0	0	0	0	1.36173	2.97543	0.778151	1.38021	0.954243	0	2.33445	1.23045	0	0	1.5682	0	0	0	0	0	1.23045	1.5563	1.90849	0	0	1.34242	0	0	0	0	0.954243	0	0	0	0	0	0	0	1.04139	2.02119	0.69897	1.79934	2.75664	3.4178	1.04139
8950-3	8950	8950-3	0.845098	1.23045	0	0.778151	0	0	1.32222	2.91381	0	1.14613	0.845098	0	2.38739	1.4624	0.845098	0	1.47712	0	0	0	0	0	1.62325	1.41497	1.85126	0	0	1.47712	0	0	0	0	0	0	0	0	0	0	0.778151	0	0.845098	2.07918	0.778151	1.8451	2.58883	3.26482	1
8953-1	8953	8953-1	0	1.07918	0	0	0	0	1.32222	3.10072	0	1.39794	1.25527	0	2.37658	1.14613	0.477121	0	1.41497	0	0	0	0.954243	0	1.54407	1.86332	1.90849	0	0	1.51851	0	0	0	0	0	0	0	0	0	0	1.04139	0	0.954243	2.52244	1.30103	2.07188	2.80003	3.49541	1.27875
8953-2	8953	8953-2	0.90309	1.23045	0	0	0	0	1.36173	2.97818	0.477121	1.4624	0	0	2.25527	0.90309	0.845098	0.845098	1.49136	0	0	0	0	0	1.50515	1.61278	1.30103	0	0	1.5563	0	0.845098	0	0	0.778151	0	0	0	0	0	0	0.477121	0.30103	2.32634	1.17609	1.81291	2.67761	3.32366	1.07918
8953-3	8953	8953-3	1.07918	0.778151	0.845098	0	0	0	1.30103	2.96379	0.30103	1.36173	0	0.778151	2.24304	1.41497	0	0	1.62325	0	0	0	0	0	1.43136	1.79239	1.92428	0	0	1.5563	0	0	0	0	0	0	0	0	0.477121	0	0	0	0.90309	2.2878	0.954243	1.82607	2.56937	3.33405	1.39794
8955-2	8955	8955-2	0.845098	0.60206	0	0	0	0	0.90309	2.8704	0.477121	1.34242	0.90309	0.69897	2.3784	1.23045	0	0	1.30103	0	0	0	0	0	0.778151	0	2.03743	0	0	0.954243	0	0	0	0	0	0	0	0	0	0	0	0.60206	0.778151	2.34439	0	1.91908	2.62014	3.43008	1.32222
8955-1	8955	8955-1	1.17609	0.778151	0	0	0	0	0.778151	3.28126	0	1.5682	0.90309	0	2.30103	1.07918	0	0	1.54407	0	0	0	0	0	1.34242	0	1.75587	0	0	0	0	0	0	0	0	0	0	0	0	0	1	1.11394	1.07918	2.34044	0.778151	1.94448	2.47857	3.45469	1.20412
8955-3	8955	8955-3	1.07918	1.23045	0.60206	0	0	0	1.20412	3.11327	0.477121	1	0.90309	0.69897	2.4133	1.14613	0.845098	0	1.27875	0	0	0	0	0	1.41497	1.04139	1.90309	0	0	0.90309	0	0	0	0	0	0	0	0	0	0	0.90309	0	0	2.29003	0	2	2.27875	3.34733	1.11394
8957-3	8957	8957-3	0.69897	0.60206	0	0	0	0	0	3.0465	0	1.11394	0	0	2.27646	1.41497	1	0	1.60206	0	0	0	0	0	1.34242	0	1.87506	0	0	0.69897	0	0	0	0	0	0	0	0	0	0	0	0	0	2.18469	1	1.60206	2.62014	3.35102	0.90309
8957-2	8957	8957-2	1.04139	1.14613	0	0.477121	0	0	1.30103	3.02735	0	1.30103	1.11394	0	2.4183	1.4624	0.69897	0	1.6902	0	0	0	0	0	1.17609	1.38021	2.16435	0	0	0.954243	0	0	0	0.845098	0.60206	0	0	0	0	0	1	0.69897	0.69897	2.34242	1.14613	2.06819	2.57634	3.37566	1.30103
8957-1	8957	8957-1	0.954243	0.60206	0	0	0	0	1.30103	3.00475	0.90309	1.38021	0.90309	0	2.26717	1.27875	0.954243	0	1.49136	0	0	0	0	0	1.36173	1.04139	1.94939	0	0	1.17609	0	0	0	0	0	0	0.30103	0	0	0	0	0.69897	0.60206	2.29885	0.60206	2.0086	2.59879	3.2887	1.11394
8958-2	8958	8958-2	0.90309	1.11394	0	0.30103	0	0.477121	1.32222	3.11992	0	1.32222	1.07918	1	2.44404	1.04139	0.778151	0	1.47712	0	0	0	0	0	1.44716	1.14613	2.12057	0	0	1.41497	0	0	0	0	0	0	0	0.30103	0	0	0.30103	0	0.60206	2.26717	1.14613	1.97772	2.46389	3.38525	1.23045
8958-1	8958	8958-1	1.17609	0	0	0	0	0	1.07918	3.00303	0	1.30103	1.14613	0	2.43616	0.69897	0.90309	0	1.23045	0	0	0	0	0	1.14613	1.17609	1.8451	0	0	1.14613	0	0	0.30103	0	0	0	0.60206	0	0	0	0	0	0	2.39094	1.30103	2.04139	2.54407	3.31952	1.25527
8958-3	8958	8958-3	0	0.90309	0	0	0	0	0.90309	2.87679	0	1.36173	1.17609	0	2.71933	1.75587	0.845098	0	1.11394	0	0	0	0	0	1.04139	0.954243	1.75587	0	0	0.69897	0	0	0	0	0	0	0	0	0	0	1.04139	0	1.17609	2.50515	1.25527	2.26482	2.67117	3.72255	1.61278
8959-3	8959	8959-3	0.30103	0.60206	0	0	0.477121	0	1.27875	2.97174	0.845098	1.39794	1.17609	0	2.28103	0.954243	0.477121	0.90309	1.53148	0	0	0	0	0	1.43136	1	2.03743	0	0	0.778151	0	0	0	0	0	0	0	0	0	0	0.477121	0	0	2.28103	0.954243	1.81954	2.55991	3.29623	0.954243
8959-1	8959	8959-1	0.845098	0.845098	0	0	0	0.60206	0.954243	3.30771	0	1.39794	0.954243	0.69897	2.33041	1.14613	0.69897	0	1.39794	0	0	0	0	0	1.23045	0.69897	1.97313	0	0	0	0	0	0	0	0	0	0	0	0	0	0.778151	0.477121	0	2.28103	1	1.94939	2.59439	3.43949	0.778151
8959-2	8959	8959-2	1.14613	0.69897	0	0	0.30103	0	1.04139	3.07954	0.30103	1.4624	0.954243	0	2.29885	1.25527	0.778151	0	1.36173	0	0	0	0	0	0.954243	0.90309	1.81291	0	0	0	0	0	0	0	0	0	0	0	0	0	0	0	0.954243	2.08279	0.60206	1.83251	2.39445	3.32593	1.14613
8960-1	8960	8960-1	0.845098	0.778151	0	0	0	0	1	3.2003	0	1.34242	1	1.04139	2.29003	0.477121	1.04139	0	1.53148	0	0	0	0	0	1.50515	1.14613	1.68124	0	0	0	0	0	0	0	0	0	0	0	0	0	0	0	0.845098	2.22011	0.778151	1.87506	2.74429	3.38274	1.17609
8960-2	8960	8960-2	0.954243	1	0	0	0	0.477121	0	3.05881	0.69897	1.07918	0.60206	0	2.22272	1.17609	0.60206	0	1.53148	0	0	0	0	0	1.11394	0	2.05308	0	0	0.778151	0	0	0	0	0	0	0	0.30103	0	0	0.954243	0.60206	1	1.99564	0	1.8451	2.55388	3.39129	1.11394
8960-3	8960	8960-3	0	1.17609	0	0	0	0	0.90309	2.95952	0.778151	0.90309	0.845098	0.90309	2.66181	2.0607	0.90309	0	1.25527	0	0	0	0	0	1.39794	0	0	0	0	0.954243	0	0	0	0	0	0	0	0	0	0	1	0	0	2.64444	1.07918	1.85733	3.15957	3.7602	1.41497
8961-1	8961	8961-1	0.90309	0.90309	0	0	0	0	0.90309	3.16791	0	1.27875	0.90309	0.69897	2.3075	1.04139	0.69897	0	1.43136	0	0	0	0	0	1.44716	0.69897	1.81954	0	0	0	0	0	0	0	0	0	0	0.30103	0	0	0.69897	0	0.69897	2.1959	1.07918	1.80618	2.69373	3.40637	0.954243
8961-2	8961	8961-2	0.69897	0.477121	0	0	0	0	0.90309	2.9489	0	1.43136	1.27875	0.69897	2.5611	1.23045	1.07918	0	1.44716	0	0	0	0	0	0.954243	1.23045	1.60206	0	0	1.20412	0	0	0	0	0	0	0	0	0	0	0	0.69897	0.845098	2.31387	0.778151	1.88081	2.80956	3.53933	1.23045
8961-3	8961	8961-3	0.845098	0.90309	0	0	0	0	0.954243	3.15897	0.778151	1.41497	1.11394	0.778151	2.36549	0.954243	0.954243	0	1.53148	0	0	0	0.60206	0	1.53148	1.44716	1.85126	0	0	1.32222	0	0	0	0	0	0	0	0	0	0	0.477121	0.778151	0.90309	2	0.778151	1.97313	2.54777	3.4079	1.17609
8964-2	8964	8964-2	0.954243	0.778151	0	0	0	0	0.477121	3.25334	0.477121	1.43136	1.11394	0.845098	2.35603	1.04139	0.477121	0	1.43136	0	0	0	0	0	1.41497	1	1.73239	0	0	0	0	0	0	0	0	0	0	0	0	0	0.69897	0.90309	0	2.17609	0.69897	1.85733	2.42651	3.39217	1.39794
8964-3	8964	8964-3	0	0	0	0	0	0	0	3.01326	0	1.32222	1.11394	0	2.37475	1.39794	0.69897	0	1.20412	0	0	0	0	0	0.845098	0.778151	1.39794	0	0	1.07918	0	0	0	0	0	0	0	0	0	0	0.954243	0.778151	1.14613	2.27184	1.07918	1.96848	2.58206	3.61982	1.44716
8964-1	8964	8964-1	0.90309	0	0	0	0	0	0	3.2307	0	1.30103	0.90309	0	2.24797	1.14613	0.90309	0	1.4624	0	0	0	0	0	1.07918	0	1.74036	0	0	0	0	0.778151	0	0	0	0	0	0	0	0	0	0	1.20412	2.23805	0.778151	1.90309	2.6149	3.38863	1.17609
8966-1	8966	8966-1	0.60206	0	0	0	0	0	0.69897	3.20656	0	1.36173	1.14613	0	2.45025	1.43136	0.778151	0	1.5563	0	0	0	0	0	0.60206	0	1.88649	0	0	0.90309	0	0	0	0	0	0	0	0	0	0	0	0.60206	1.14613	2.22272	1	2.01284	2.70586	3.44778	1.20412
8966-2	8966	8966-2	0.30103	1.04139	0	0	0	0	1.20412	3.16227	0.778151	1.25527	0.30103	0.90309	2.27646	1.30103	0	0	1.49136	0	0	0	0	0.90309	1.23045	0	1.88649	0	0	0.778151	0	0	0	0	0	0	0	0	0	0	0	0.778151	0.69897	2.18752	0	1.82607	2.65128	3.40157	1.07918
8966-3	8966	8966-3	0.90309	1.25527	0	0	0	0	1.36173	2.99388	0	1	0.778151	0	2.49276	1.04139	1.04139	0	1.44716	0	0	0	0	0	1.47712	0	2.08991	0	0	1.39794	0	0	0	0	0	0	0	0	0	0	0	0.90309	0.60206	2.25042	0	2.0607	2.53656	3.32818	1.20412
8967-1	8967	8967-1	0	0	0	0	0	0	0.90309	3.16047	0	1.41497	1.07918	0	2.45179	1.47712	0.845098	0	1.41497	0	0	0	0	0	1.44716	0	1.90309	0	0	0.60206	0.30103	0	0	0	0	0	0	0	0	0	0.69897	0	0.778151	2.25285	0.954243	1.92942	2.71933	3.39759	1.04139
8967-2	8967	8967-2	1.25527	1.23045	0	0	0	0	1.23045	3.086	0	1.43136	1.04139	0.477121	2.34242	1.04139	0.845098	0	1.41497	0	0	0	0	0	1.47712	0	1.86332	0	0	0	0	0	0	0	0	0	0	0	0	0	0	0.30103	0.69897	2.23045	0.778151	1.97313	2.66558	3.35025	1.14613
8967-3	8967	8967-3	0	0.60206	0	0	0	0	1.04139	2.94694	0	1.11394	1.11394	0.778151	2.35793	1.20412	0.778151	0	1.17609	0	0	0	0	0	1.43136	1.53148	1.89763	0	0	1.17609	0	0	0	0	0	0	0	0	0	0	0	0	0	2.32428	0.954243	2.02119	2.64836	3.41145	1.20412
8969-2	8969	8969-2	1.20412	0.954243	0	0	0	0	0.90309	3.13001	0	1.27875	1.11394	0	2.11727	1.32222	0	0	1.38021	0	0	0	0	0	1.39794	0	1.76343	0	0	0.60206	0	0	0	0	0	0	0	0	0.60206	0	0	0.60206	0.954243	2.13033	0.954243	1.79934	2.50515	3.36229	1.04139
8969-1	8969	8969-1	0	0.477121	0	0	0	0	0.954243	2.76716	0.845098	0.90309	1.38021	0	2.79309	1.39794	0.60206	0	1.32222	0	0	0.845098	0	0	1.38021	2.17026	1.23045	0	0	1.23045	0	0	0	0	1.17609	0	0	0	0	0	0.30103	0.845098	1	2.73878	1.30103	2.31597	2.89154	3.55606	1.66276
8969-3	8969	8969-3	0.90309	1	0	0	0	0	1.04139	3.17289	0.69897	1.32222	1	0	2.36549	1.14613	1	0	1.4624	0	0	0	0	0	0.90309	0	2.11059	0	0	0	0	0	0	0	0	0	0	0	0	0	0	0	0.845098	2.20683	0.69897	1.9345	2.46687	3.43664	1.23045
8971-3	8971	8971-3	0.954243	0.477121	0	0	0.477121	0	0.845098	3.05038	0	1.51851	0.845098	0	2.21219	0.845098	0.30103	0	1.44716	0	0	0	0	0	1.17609	1.14613	1.77815	0	0	0.69897	0	0	0	0	0	0	0	0	0	0	0	0	0.477121	2.23045	1.07918	1.95904	2.4133	3.3483	1.17609
8971-1	8971	8971-1	0.90309	0	0	0	0	0	0.954243	2.78533	0.60206	1.30103	0.90309	0	2.27416	1.25527	0.845098	0	1.5682	0	0	0	0	0	1.25527	1.47712	1.32222	0	0	0.69897	0.477121	1.11394	0	0	0	0	0	0	0	0	0	0	1.07918	2.24551	0.90309	2.02531	2.70927	3.46761	1.07918
8971-2	8971	8971-2	0.69897	0.845098	0	0	0	0	0.69897	3.12385	0.778151	1.23045	1	0	2.29667	1.07918	0	0	1.38021	0	0	0	0	0	1.11394	0	1.85733	0	0	0.69897	0	0.477121	0	0	0	0	0	0	0.30103	0	0.778151	0.778151	0	2.11394	0.778151	1.73239	2.43457	3.39094	1.25527
8974-1	8974	8974-1	1.11394	0	0	0	0	0	0.477121	3.16997	0	1.11394	1.11394	0	2.35411	1.34242	0.69897	0	1.20412	0	0	0	0	0	1.17609	0	1.65321	0	0	0	0	0	0	0	0	0	0	0	0	0	0.60206	0	0.954243	2.29003	1.07918	1.89763	2.55751	3.36847	1.17609
8974-2	8974	8974-2	0.30103	1.04139	0	0	0	0	0.778151	3.16197	0.90309	1.27875	0.69897	0.778151	2.233	1.32222	0.845098	0	1.49136	0	0	0	0	0	1.23045	1.07918	1.86332	0	0	0.845098	0	0	0	0	0	0	0	0	0	0	0	0	0	2.19033	1.04139	1.77085	2.55388	3.41296	1.27875
8974-3	8974	8974-3	0	0	0	0	0	0	0.954243	2.82995	0	1.04139	1.17609	1	2.7574	1.716	0.90309	0	1.14613	0	0	0	0	0	1.53148	0.90309	0	0	0	0.778151	0	1.14613	0	0	0	0	0	0	0	0	0.845098	0.845098	0.90309	2.4183	1.07918	2.19033	2.68574	3.69557	1.69897
8978-2	8978	8978-2	0	0.60206	0	0	0	0	0	2.60531	1	1.30103	1.20412	0.778151	2.62014	1.49136	1.17609	0	1.14613	0.845098	0	0	0	0	1	1.53148	1.44716	0	0	0.778151	0	0	0	0	0	0	0	0	0	0	0	0.477121	1.25527	2.58883	1.14613	2.23553	2.82672	3.5266	1.38021
8978-1	8978	8978-1	0.954243	0.60206	0	0	0	0	1.04139	3.17143	0	1.30103	0.845098	0.69897	2.45179	1.04139	0	0	1.41497	0	0	0	0	0	1.38021	1.17609	2.07188	0	0	0	0	0	0	0	0	0	0	0	0	0	0.954243	0	0	2.29003	1.14613	2.2014	2.74819	3.40875	1.17609
8978-3	8978	8978-3	0.60206	1.17609	0	0	0.845098	0.69897	1.69897	3.16761	1.97313	1.60206	1.5682	1.50515	1.43136	1	1.6902	1.69897	2.43775	1.07918	1.34242	0	0.90309	0	2.31175	3.04999	1.47712	0.954243	1.44716	2.45788	1.59106	1.59106	1.30103	1.32222	1.07918	0	1.54407	0.90309	0	0	2.66087	1.79934	0.954243	2.68842	1.4624	2.17319	2.67852	3.4813	1.6902
8979-3	8979	8979-3	1.14613	1.20412	0	0.90309	0	0	1.5682	2.96237	1.11394	1.44716	0.90309	0	2.12057	0.90309	1.17609	0.69897	1.57978	0	0.778151	0	1	0	1.69897	2.25768	2.0086	0	0.954243	1.81291	0	0	0	0.954243	0.778151	0	0	0	0	0	0	0.778151	0	2.15229	1.07918	1.89209	2.49554	3.25479	1.23045
8979-1	8979	8979-1	1.04139	0	0	0	0	0	1.17609	3.03543	0	1.25527	0.60206	0	2.27416	1.14613	0	0.90309	1.07918	0	0	0	0	0	0	1	0	0	0	0	0	0	0	0	0	0	0	0	0	0	0	0	0.954243	2.11394	0	1.85126	2.60423	3.23121	0.845098
8979-2	8979	8979-2	0.30103	0.60206	0	0	0	0	0.60206	3.0141	0	1.25527	1.11394	0	2.30535	0.954243	0	0	1.14613	0	0	0	0	0	0.60206	0	1.76343	0	0	0.30103	0	0	0	0	0	0	0	0	0	0	0.60206	0	0.69897	2.21219	1.17609	1.93952	2.69723	3.42651	1.50515
8981-3	8981	8981-3	0	0.60206	0	0	0	0	0	2.90687	0	1.38021	0.90309	0.69897	2.60746	1.5563	0.90309	0	1.30103	0	0	0	0	0	0.778151	1.11394	1.39794	0	0	0.90309	0.30103	0	0	0	0	0	0	0	0	0	0.90309	0.845098	1	2.46389	1.11394	2.04532	2.8055	3.5841	1.23045
8981-1	8981	8981-1	0.30103	1.14613	0	0.845098	0	0	1.14613	2.94101	0.30103	1.14613	1.04139	0.845098	2.31387	1.43136	0.90309	0	1.4624	0	0	0	0	0	1.30103	1.70757	1.91381	0	0	1.27875	0	0	0	0	0	0	0	0	0	0	0	0	0.69897	2.41996	0.778151	2.04532	2.65514	3.31429	1
8981-2	8981	8981-2	1.04139	1	0	0	0	0	1.07918	3.09795	0.477121	1.41497	1.20412	0.69897	2.35793	1.11394	0	0	1.44716	0	0	0	0	0	1.4624	1.39794	1.90849	0	0	1.04139	0	0	0	0	0	0	0	0	0	0	0	0	1.14613	2.26007	1	1.90849	2.58771	3.41896	1
8982-2	8982	8982-2	0.90309	0.60206	0	0	0	0	0.954243	3.01368	0	1.30103	1	0.778151	2.29667	1.07918	0.90309	0	1.17609	0	0	0	0	0	1.36173	0	1.83885	0	0	0.845098	0	0	0	0	0	0	0	0	0	0	0.477121	0.845098	1.20412	2.21484	0.845098	1.89763	2.65418	3.39393	1.04139
8982-3	8982	8982-3	0	0.778151	0	0	0	0	1.27875	2.74351	0	1.38021	1.14613	0	2.7364	1.61278	0.69897	0	1.38021	0	0	0.954243	0	0	0.778151	1.74036	1.32222	0	0	1.65321	0	0	0.778151	0	0	0	0	0	0	0	0.477121	0	0	2.61066	1.50515	2.3962	2.8657	3.57542	1.47712
8982-1	8982	8982-1	0	0	0	0	0	0	0.778151	2.8537	0.90309	1.34242	1.04139	0.954243	2.55023	1.44716	0.845098	0	1.23045	0	0	0	0	0	1.4624	1.20412	1.6721	0	0	1.25527	0	0.778151	0.477121	0	0.954243	0	0	0	0	0	0.845098	0.60206	1.04139	2.47276	1.44716	2.16435	2.90956	3.5284	1.43136
8983-1	8983	8983-1	1.11394	0.778151	0	0	0	0	1.07918	3.23779	0.477121	1.44716	1.11394	0	2.37658	1.11394	0.90309	0	1.34242	0	0	0	0	0	1.27875	0.90309	1.88081	0	0	1.04139	0	0	0	0	0	0	0	0	0	0	0	0	0.954243	2.09342	1.14613	1.86332	2.79865	3.37803	1.07918
8983-2	8983	8983-2	1.23045	1.04139	0	0	0	0	0	3.17898	0	1.38021	0.90309	0	2.21219	1.17609	0.69897	0	1.4624	0	0	0	0	0	1.4624	0	1.6902	0	0	1.07918	0	0	0	0	0	0	0	0	0	0	0	0	0	2.17026	0	1.76343	2.53403	3.40329	0.954243
8983-3	8983	8983-3	0	0	0	0	0	0	0	2.68124	0.845098	1.30103	1.11394	0	2.51188	1.72428	0.778151	0	1.25527	0	0	0	0	0	0.845098	0	1.14613	0	0	0	0	0	0	0	0	0	0	0	0	0	0.954243	0	1.04139	2.28103	1	1.93952	2.8055	3.56996	1.59106
8985-1	8985	8985-1	1	0.69897	0	0	0	0	0	3.21722	0.30103	1.23045	0.90309	0	2.25042	1.27875	0.30103	0	1.41497	0	0	0	0	0	1.14613	0	1.95424	0	0	0	0.778151	0	0	0	0	0	0	0	0	0.30103	0	0	0	2.12385	0.778151	1.61278	2.64836	3.34753	0.954243
8985-2	8985	8985-2	1.25527	1.04139	0.477121	0	0	0	0.778151	3.04883	0	1.27875	1.23045	0.69897	2.29226	0.778151	0.60206	0	1.49136	0	0	0	0	0	1.34242	0	1.81954	0	0	0	0	0	0	0	0	0	0	0	0	0	0	0	0.778151	2.17898	0.778151	1.97313	2.37291	3.28646	1.20412
8985-3	8985	8985-3	0	0.845098	0	0	0	0	0.69897	2.82217	1	0.778151	0.477121	1	2.48996	1.53148	0	0	1.04139	0	0	0	0	0	1	0	0	0	0	1.17609	0	0	0	0	0	0	0	0	0	0	1.11394	0	1.20412	2.29885	0.60206	1.97313	2.82217	3.61857	1.39794
8986-2	8986	8986-2	1.11394	0.90309	0.477121	0	0	0	0	3.21299	0.60206	1.04139	0.954243	0.30103	2.30535	1.27875	0.90309	0	1.50515	0	0	0	0	0	1.30103	0	1.75587	0	0	0.778151	0	0	0	0	0	0	0	0	0	0	0.477121	0.30103	0.60206	2.22272	0.477121	1.81954	2.39794	3.38021	1
8986-1	8986	8986-1	0.69897	0	0	0	0	0	0.60206	3.15957	0.69897	1.20412	0.69897	0	2.11059	1	0.954243	0	1.34242	0	0	0	0	0	0.778151	1.17609	0	0	0	0.845098	0	0	0	0	0	0	0	0	0	0	0	0	0	2.18752	0	1.80618	2.65321	3.33183	0.954243
8986-3	8986	8986-3	1.07918	0.845098	0	0	0	0	0.60206	3.01536	0.69897	1	0.778151	0.60206	2.23553	1.44716	0.30103	0	1.20412	0	0	0	0	0	1.30103	0.60206	1.94939	0	0	0.30103	0	0	0	0	0.477121	0	0	0	0	0	0	0	0.60206	2.13033	0	1.80618	2.43457	3.2393	0.954243
8987-3	8987	8987-3	1.14613	1.36173	0	0	0	0	0	3.04021	0	1.34242	1	0	2.32634	1.38021	0.845098	0	1.39794	0	0	0	0	0	0.778151	1.50515	1.82607	0	0	1.66276	0	0	0	0	0	0	0	0	0	0	0	0	0	2.26951	1.14613	2.03342	2.64836	3.38238	1.39794
8987-1	8987	8987-1	0	0	0	0	0	0	0.90309	3.04766	0.845098	1.20412	0.30103	0	2.08636	1.27875	0	0.845098	1.6721	0	0.778151	0	0	0	1.64345	2.233	1.62325	0	0	1.17609	0	0	0	0.69897	0.477121	0	0	0.30103	0	0	1.49136	0.778151	0.90309	2.4216	1	2.0086	2.8055	3.43553	1.04139
8987-2	8987	8987-2	0.477121	1.17609	1.04139	0	0.30103	0	1.25527	2.8848	0.477121	1.20412	1	0	2.22789	0.60206	0.69897	0	1.50515	0	0	0	0	0	1.36173	1.74819	1.90849	0	0	1.36173	0	0	0	0	0	0	0	0	0	0	0	0.60206	0.69897	2.02531	0.778151	1.83885	2.58092	3.27091	0.30103
8988-1	8988	8988-1	0	0.845098	0	0	0	0	1	3.07372	0	1.27875	1.14613	1	2.19866	0.845098	0	0	1.30103	0	0	0	0	0	1.38021	1.25527	1.65321	0	0	0	0	0.69897	0	0	0	0	0	0	0	0	0	0	1.07918	2.28103	0.69897	1.89763	2.64345	3.4456	1.07918
8988-2	8988	8988-2	1.20412	1.30103	0	0	0	0	1.57978	2.96567	0.778151	1.34242	0.778151	0	2.3483	1.30103	0.477121	0	1.51851	0	0	0	0	0	1.32222	1.66276	1.74819	0	0	1.36173	0	0	0	0	0	0	0	0	0	0	0	0	0.60206	2.27646	1.04139	1.86923	2.64738	3.33405	0.778151
8988-3	8988	8988-3	0.60206	1.07918	0	0	0	0	1.43136	2.82672	0	1	1.17609	0.477121	2.22789	1.17609	0	0	1.32222	0.69897	0	0	0	0	1.14613	1.79934	1.95904	0	0	1.47712	0	0	0	0	0	0	0	0	0	0	0	0	0	2.14301	0	1.85126	2.51455	3.28735	1.17609
8989-2	8989	8989-2	1.27875	1.17609	0.69897	0	0	0	0.778151	3.06967	0	1.23045	1	0.60206	2.34044	1.43136	0.778151	0	1.38021	0	0	0	0	0	1.38021	1.11394	2.02531	0	0	1	0	0	0	0	0	0	0	0	0	0	0	0	0.30103	1.96848	0	1.86923	2.55509	3.43345	0.90309
8989-1	8989	8989-1	0	0	0	0	0	0	1.11394	2.74507	0	1.47712	1.36173	0.69897	2.7007	1.5682	0.778151	0	1.27875	0	0	0.477121	0	0	1.51851	1.20412	0	0	0	1.17609	0	0	0	0	0	0	0	0	0	0	0.845098	0	1.39794	2.18184	1.17609	2.21484	2.90849	3.60043	1.36173
8989-3	8989	8989-3	1	0.69897	0	0	0	0	1.11394	3.04571	0	1.25527	1.07918	0.30103	2.36173	1.36173	0.60206	0	1.5682	0	0	0	0	0	0.954243	0.90309	2.03342	0	0	0	0	0	0	0	0	0	0	0	0	0	0	0	0.477121	2.07918	0.30103	1.94939	2.51587	3.38596	1.30103
8990-3	8990	8990-3	1.17609	0.778151	0	0	0	0	0	3.10415	0.477121	1.17609	0.90309	0	2.30103	1.38021	0.69897	0	1.38021	0	0	0	0	0	0.954243	1.14613	1.5563	0	0	1.11394	0	0	0	0.778151	0	0	0	0	0	0	0.60206	0	0	1.91908	1.11394	1.73239	2.55509	3.40243	1.49136
8990-1	8990	8990-1	1.11394	1	0	0	0	0	1.14613	3.33325	0.845098	1.39794	1	0	2.50515	1.4624	0.69897	0	1.39794	0	0	0	0	0	1.27875	0	1.95424	0	0	1.11394	0	0.69897	0	0	0	0	0	0	0	0	0.69897	0	1.23045	2.08279	1.23045	2.08636	2.72263	3.49346	0.954243
8990-2	8990	8990-2	1	0.477121	0	0	0	0.778151	0.30103	3.24822	0.778151	1.17609	1.32222	0.845098	2.36549	1.25527	0.90309	0.69897	1.53148	0	0	0	0	0	1.41497	1	1.89209	0	0	0	0	0	0.477121	0	0	0	0	0	0	0	1	0	0.90309	2.17026	0.954243	1.82607	2.62839	3.44871	1.04139
8992-3	8992	8992-3	0.954243	1.27875	0	1	0	0	1.30103	2.94547	0	0.30103	1.11394	0.954243	2.31175	1	0.778151	0	1.50515	0	0	0	0	0	1.20412	1.43136	2.06819	0	0	1.49136	0	0	0	0	0	0	0	0	0	0	0	0	0.477121	2.14301	0.90309	1.85126	2.49831	3.26928	0.954243
8992-1	8992	8992-1	0	0	0	0	0	0	0.60206	2.85854	0	1.38021	1.07918	0	2.5563	1.60206	1	0	1.4624	0	0	0	0	0.477121	1.20412	1.11394	1.38021	0	0	1.20412	0	0.778151	0.30103	0	0	0	0	0	0	0	0.778151	0	1.36173	2.44404	1.17609	2.16732	2.96708	3.61648	1.36173
8992-2	8992	8992-2	1.04139	1	0	0	0	0	1.11394	3.02036	0.477121	1.20412	0.90309	0	2.37291	0.778151	1.07918	0.60206	1.65321	0	0	0	0	0	1	0	1.94939	0	0	1.20412	0	0	0	0	0	0	0	0	0	0	0	1.23045	0.845098	2.32015	1.20412	2.14301	2.62325	3.38346	0.845098
8993-2	8993	8993-2	0.69897	0.778151	0	0	0	0	0.954243	2.97864	0	1	1.11394	0.69897	2.20412	1	0	0	1.43136	0	0	0	0	0	1	0	1.5682	0	0	0.90309	0	0	0	0	0	0	0	0	0	0	0	0	0	2.23805	0.954243	1.77815	2.56348	3.32056	1.27875
8993-1	8993	8993-1	0.90309	0.477121	0	0	0	0	1.44716	2.85612	0	1.32222	1.04139	0.30103	2.09342	1.14613	0.69897	0	1.50515	0	0	0	0	0	1.44716	1.90849	1.70757	0	0	1.20412	0	0	0	0	0	0	0	0	0	0	0	0	0.845098	2.33445	0.845098	1.89209	2.64246	3.26293	1.04139
8993-3	8993	8993-3	0	0	0	0	0	0	0	2.66276	0.69897	1.38021	0.954243	1	2.549	1.75587	1.04139	0	1.32222	0	0	0	0	0	1.20412	0	1.30103	0	0	1.23045	0	0	0	0	0	0	0	0	0	0	0.69897	0.30103	0.90309	2.49415	1.11394	2.15229	2.86094	3.53224	1.53148
8994-3	8994	8994-3	1.69897	1.70757	0	0	0	1.04139	1.6902	3.25527	1.63347	1.64345	1.11394	1.20412	1.32222	0	2.20952	1.59106	2.71933	0	1.5682	0	0	0.60206	2.41996	2.7574	1.44716	0.845098	1.32222	2.03743	1.11394	0	0	1	0	1.04139	0	1.32222	2.32015	0	2.02531	1.92942	1	2.07555	1.11394	1.44716	2.33646	3.11394	1.11394
8994-1	8994	8994-1	1.23045	0.69897	0	0	0	0	1.25527	2.94645	0	1.23045	1.11394	0	2.22531	0.845098	0	0	1.53148	0	0	0	0	0	1.17609	1.36173	1.92428	0	0	1	0	0	0	0	0.477121	0	0	0	0	0	0	0.60206	0	2.12385	0.845098	1.94448	2.62428	3.27207	0.954243
8994-2	8994	8994-2	1.23045	0.954243	0.30103	0	0	0	1.07918	2.95376	0	1.41497	0.60206	0.69897	2.31597	1.36173	0.30103	0	1.32222	0	0	0	0	0	1.30103	0.60206	1.88649	0	0	0.90309	0	0	0.477121	0	0	0	0	0	0	0	0	0.477121	1.07918	2.05308	0	1.79934	2.64048	3.33846	0.90309
8995-1	8995	8995-1	1.14613	0.778151	0	0	0	0	0.90309	3.21405	0	1.34242	0	0.845098	2.27416	1.07918	0.60206	0	1.30103	0	0	0	0	0	1.23045	0	1.6902	0	0	0.954243	0	0	0	0	0	0	0	0	0	0	0	0	0.30103	2.33445	0	1.92942	2.74194	3.44654	0.90309
8995-2	8995	8995-2	0.60206	0.845098	0	0	0	0	0	2.88649	0	1.04139	0.60206	0	2.21219	0.845098	0.778151	0	1.23045	0	0	0	0	0	1.36173	0	1.94448	0	0	0	0	0	0	0	0	0	0	0	0	0	0	0	0.954243	2.34635	0.69897	1.96379	2.43616	3.41497	1.27875
8995-3	8995	8995-3	0	0	0	0	0	0	1.17609	2.70672	0	1.14613	0.778151	0.778151	2.64836	1.43136	0.90309	0	1.14613	0	0	0	0	0	1.25527	0	1.38021	0	0	0.845098	0	0	0	0.30103	0	0	0	0	0	0	0.845098	0	0	2.39794	1.32222	2.19033	2.65128	3.60108	1.44716
8997-1	8997	8997-1	1.04139	0.845098	0	0	0	0	1.34242	3.08991	0	1.25527	0.954243	0	2.38739	1.27875	0.778151	0	1.27875	0	0	0	0	0	1.38021	0	2.0086	0	0	0.69897	0	0	0	0	0	0	0	0	0	0	0.477121	0	0	2.23045	1.04139	1.96379	2.72673	3.41263	1.39794
8997-3	8997	8997-3	0.69897	0.778151	0	0	0	0	1.20412	3.17551	0	1.23045	0.778151	0.30103	2.31175	1.41497	0.778151	0	1.25527	0	0	0	0	0	1.34242	0.954243	1.77815	0	0	0.778151	0	0	0	0	0	0	0	0	0	0	0	0	0.477121	2.17026	1.04139	1.87506	2.60423	3.4612	0.954243
8997-2	8997	8997-2	1.20412	0.60206	0	0	0	0	1.30103	3.1038	0	1.39794	1.04139	0.30103	2.32222	1.4624	0.69897	0	1.32222	0	0	0	0	0	1.32222	1.07918	1.73239	0	0	0.845098	0	0	0	0	0	0	0	0	0	0.60206	0	0	0.954243	2.04532	1.04139	1.99564	2.76343	3.44232	1.23045
8998-3	8998	8998-3	1	0.90309	0	0	0	0	0.30103	3.11694	0	1.20412	0	0.778151	2.26482	1.14613	0.69897	0	1.44716	0	0	0	0	0	0.69897	0	1.9345	0	0	0	0	0	0	0	0	0	0	0	0	0	0	0	0	2.06446	0.845098	1.80618	2.64738	3.38453	1.30103
8998-1	8998	8998-1	0.90309	0.477121	0	0	0.477121	0	0	3.25334	0	1.34242	1.20412	0	2.22531	0	0.69897	0	1.61278	0	0	0	0	0	1.4624	0	1.86332	0	0	0	0.69897	0	0	0	0	0	0	0	0	0	0	0.845098	0.954243	2.25285	0.90309	1.90309	2.6902	3.41764	0.90309
8998-2	8998	8998-2	1.23045	0.845098	0	0	0	0.30103	1.11394	3.19645	0.477121	1.23045	1.07918	0.30103	2.38739	1.07918	0	0	1.36173	0	0	0	0	0	1.44716	0	1.96848	0	0	0	0	0	0	0	0	0	0	0	0	0	0	0	0.954243	2.22531	1	1.80618	2.5682	3.40552	1.04139
8999-2	8999	8999-2	1	0.60206	0	0	0	0	1.39794	3.03543	0.477121	1.41497	0.60206	0.477121	2.3032	1.30103	0	0	1.36173	0	0	0	0.778151	0	1.34242	0	1.63347	0	0	0.954243	0	0	0	0	0	0	0	0	0	0	0.30103	0.90309	0.778151	2.16435	0.90309	1.82607	2.70243	3.41497	1.44716
8999-1	8999	8999-1	1.04139	1	0	0	0	0	0.69897	3.15987	0	1.30103	1.07918	0	1.93952	0.90309	0	0	1.11394	0	0	0	0	0	1.36173	1.23045	1.66276	0	0	1.30103	0	0	0	0	0	0	0	0	0	0	0	0	0	2.03342	0	1.83251	2.60314	3.39515	0.69897
8999-3	8999	8999-3	0.778151	0	0	0	0	0.845098	0	2.81558	0	1.07918	1.20412	0	2.65321	1.68124	0	0	1	0	0	0	0	0	0.845098	0	1.5682	0	0	1.11394	0	0	0	0.60206	0	0	0	0	0	0	0.778151	0.778151	0	2.19312	1.14613	2.16137	2.7332	3.65292	1.51851
9000-3	9000	9000-3	0.90309	0.477121	0	0	0	0	0	2.98498	0	1.4624	1.04139	0	2.42813	1.30103	0.90309	0	1.25527	0	0	0	0	0	1	1.17609	1.74036	0	0	0.90309	0	0.778151	0	0.60206	0	0	0	0	0	0.778151	0	0	1.34242	2.29003	0.69897	1.82607	2.93298	3.44264	1.36173
9000-1	9000	9000-1	0	0	0	0	0	0	0	3.07004	0	1.39794	0	0	2.3032	1.34242	0.90309	0	1.25527	0	0	0	0	0	1.47712	1.27875	1.6902	0	0	0.69897	0.69897	0	0	0	0	0	0	0	0	0	0.477121	0	1.20412	2.24551	1	1.97772	2.82802	3.48515	1.30103
9000-2	9000	9000-2	0.477121	0.954243	0	0	0.69897	0	0.954243	3.11327	0	1.34242	0.90309	0	2.41162	1.44716	0.778151	0	1.44716	0	0	0	0	0	0.845098	1.11394	2.07918	0	0	0	0	0	0	0	0	0	0	0	0	0	0	0	0.778151	2.13988	0.954243	1.94448	2.56467	3.38934	1.32222
9001-1	9001	9001-1	1.04139	0	0	0	0	0	0.69897	3.14644	0	1.27875	0.60206	0.69897	2.31806	1	0.69897	0	1.34242	0	0	0	0	0	1.51851	0.477121	1.78533	0	0	1.07918	0	0	0	0	0	0	0	0	0	0	0	0	0	2.2833	0.954243	1.97313	2.55509	3.3668	1
9001-2	9001	9001-2	0.30103	1.04139	0	0.69897	0	0	1.25527	3.04454	1.04139	1.30103	1.23045	0.69897	2.25768	1.04139	1	0	1.57978	0	0	0.69897	0	0	1.11394	0	2.07188	0	0	1.14613	0	0	0.477121	0	0.30103	0	0	0	0	0	0	0.90309	0	2.20952	0.845098	2.02119	2.62839	3.37051	1.25527
9001-3	9001	9001-3	0.69897	0.90309	0	0	0	0	0.60206	3.20737	0	1.30103	1.36173	0.778151	2.3784	1.07918	0.30103	0	1.49136	0	0	0	0	0	1.25527	1.17609	1.72428	0	0	0	0	0	0	0	0	0	0	0	0	0	0	0.90309	0.845098	2.15534	0.69897	1.92942	2.66558	3.45879	0.954243
9002-1	9002	9002-1	1.27875	0.778151	0	0	0	0	0.90309	3.25959	0.778151	1.59106	0.954243	0.778151	2.36922	0.90309	0.845098	0	1.49136	0	0	0	0	0	1.23045	1.07918	2.04139	0	0	1.17609	0	0	0	0	0.30103	0	0	0	0	0	0	0.778151	0.477121	2.12057	0	1.89763	2.49415	3.42472	0.954243
9002-2	9002	9002-2	1.07918	0.90309	0	0	0	0	0	3.14364	0	1.25527	0.60206	0	2.09342	1.32222	0.69897	0	1.11394	0	0	0	0	0	1	0	0	0	0	0	0	0	0	0	0	0	0	0	0	0	0	0	0.845098	2.12385	0	1.68124	2.4843	3.30146	1.07918
9002-3	9002	9002-3	0.477121	1.17609	0	0	0	0.477121	1.17609	2.92117	0	1.25527	1.23045	0.69897	2.02531	0.954243	0	0	1.34242	0	0	0	0	0	1.30103	0	2.06446	0	0	0.845098	0	0	0	0	0	0	0	0	0	0	0	0	0	2.16435	0.477121	1.81954	2.45484	3.2634	1.11394
9003-2	9003	9003-2	1.04139	0.477121	0	0	0	0	1.20412	3.03663	0	1.64345	1	0	2.28103	1	0	0	1.36173	0	0	0	0	0	0.778151	0	1.75587	0	0	1.32222	0	0.69897	0	0	0	0	0	0	0	0	0	0	0.778151	2.02938	1	1.83251	2.5966	3.34537	1.17609
9003-3	9003	9003-3	0	0	0	0	0	0	0.30103	2.74036	0.60206	1.23045	0.954243	1.07918	2.52634	1.44716	1.11394	0	1.17609	0	0	0	0	0	1.43136	1.32222	1.5563	0	0	1.20412	0	0	0	0	0	0	0	0	0	0	0.69897	0.845098	0.90309	2.40483	0.954243	2.21219	2.86982	3.57772	1.36173
9003-1	9003	9003-1	0.954243	1.04139	0	0	0.30103	0	1.32222	3.18384	0.477121	0.954243	0.845098	0.477121	2.38382	1.17609	0	0	1.20412	0	0	0	0	0	1.36173	1.20412	1.88081	0	0	0	0	0	0	0	0.477121	0	0	0	0	0	0	0.477121	0	2.03342	1	2.12385	2.71265	3.41111	0.845098
9004-1	9004	9004-1	1	0	0	0	0	0	0.60206	3.17406	0	1.25527	1.11394	0.778151	2.28103	1.27875	0.90309	0	1.47712	0	0	0	0	0	1.36173	0	1.95424	0	0	0	0	0	0	0	0	0	0	0	0	0.30103	0	1.04139	0	2.14613	0.778151	1.97772	2.57864	3.42455	1.04139
9004-2	9004	9004-2	0.845098	0.477121	0	0	0	0	1.14613	3.21617	0	1.17609	0.778151	0.30103	2.26951	0.90309	0.60206	0	1.43136	0	0	0	0	0	1.20412	0	1.86332	0	0	0.30103	0	0	0	0	0.69897	0	0	0	0	0	0	0	0	2.14922	1.07918	1.81291	2.41497	3.3897	0.954243
9004-3	9004	9004-3	0.60206	0.845098	0	0	0	0	0.954243	3.17231	0.60206	1.30103	0.845098	0	2.35025	1.20412	0	0	1.23045	0	0	0	0	0	1.41497	0	1.9345	0	0	0.778151	0	0	0	0	0	0	0	0	0	0	0	0	0	2.13033	0.477121	1.75587	2.41162	3.43759	1.14613
9005-1	9005	9005-1	0.60206	0.90309	0	0	0	0	0.954243	3.15045	0.69897	1.38021	1.32222	0	2.38917	1.25527	0.90309	0	1.43136	0	0	0	0	0	1.43136	0.778151	0	0	0	1.20412	0	0	0	0	0	0	0	0	0.477121	0	0.69897	0	1.14613	2.29667	1	1.85126	2.49276	3.37603	0.778151
9005-2	9005	9005-2	1.04139	1	0	0	0	0	0.954243	2.87332	0.60206	1.07918	0.778151	1.07918	2.29667	1.41497	0.69897	0	1.27875	0	0	0	0	0	1.20412	1.07918	1.91908	0	0	1	0	0	0	0	0	0	0	0	0	0	0	0	0.477121	2.26245	1.11394	1.89763	2.56467	3.2388	1.04139
9005-3	9005	9005-3	0.845098	1.14613	0	0	0	0	1.43136	2.95472	0	1.27875	1.38021	0.69897	2.36361	1.23045	0.60206	0	1.44716	0	0.60206	0	0	0	1.23045	0.90309	2.13033	0.477121	0	1.32222	0	0	0	0	0	0	0	0.30103	0	0	0	0	0.778151	2.26245	0.477121	1.96848	2.52634	3.28937	1.04139
9006-2	9006	9006-2	0.954243	0.845098	0	0	0	0	1.20412	3.21272	0.845098	1.34242	0.845098	0.30103	2.34242	1.25527	0	0	1.50515	0	0	0	0	0	1.17609	0	1.81291	0	0	0	0	0	0	0	0	0	0	0	0	0.30103	1	0	0.90309	2.42975	0	1.68124	2.63144	3.40106	1.11394
9006-1	9006	9006-1	0.477121	0.60206	0	0	0	0	0.778151	3.26529	0	1.51851	1.25527	0	2.41996	1.14613	0.778151	0	1.39794	0	0	0	0	0	1.4624	0	2.10037	0	0	1.34242	0	0	0	0	0	0	0	0	0	0	0	0	0.90309	2.40654	1	1.97313	2.73957	3.44963	1.43136
9006-3	9006	9006-3	0	1	0	0	0	0	0.69897	3.04179	0	1.4624	0.845098	0	2.41996	1.23045	0.69897	0	1.51851	0	0	0	0	0	1.04139	0.90309	2.0569	0.60206	0	1.20412	0	0	0	0	0	0	0	0	0	0	0.60206	0.69897	0	2.33244	0.845098	2.03743	2.46687	3.3249	1.11394
9008-3	9008	9008-3	0.778151	1	0	0	0	0	0.69897	3.19005	0	1.36173	0.778151	0	2.25042	0.778151	0.30103	0	1.49136	0	0	0	0	0	1.25527	1.11394	1.90849	0	0	0	0	0	0	0	0	0	0	0	0	0	0.69897	0	0.845098	2.24551	0.845098	1.93952	2.52634	3.43297	1.20412
9008-1	9008	9008-1	0.30103	0	0	0	0	0	0.477121	3.14208	0	1.39794	1.38021	0	2.38202	1.23045	0.778151	0	1.23045	0	0	0	0	0	1.30103	0	1.86332	0	0	1	0	0	0	0	0	0	0	0	0	0	0	0	0	2.2833	1.11394	1.79934	2.79518	3.42635	1.27875
9008-2	9008	9008-2	0.778151	0.845098	0.477121	0	0	0	0.845098	3.14768	0.69897	1.20412	1	0.477121	2.233	1.14613	0.69897	0	1.38021	0	0	0	0	0	1.39794	0	1.59106	0	0	0.69897	0	0	0	0	0	0	0	0	0	0	0	0.30103	0.954243	2.17609	0.954243	1.80618	2.48855	3.35507	1
9010-1	9010	9010-1	0.477121	0.60206	0	0	0	0	0	2.9248	0.477121	1.32222	0.845098	1.04139	2.549	1.32222	0	0	0.778151	0	0	0	0	0	1.34242	1.11394	1.81291	0	0	1.11394	0	0	0	0	0	0	0	0	0	0	0.477121	1	1.04139	2.46982	1.07918	2.16137	2.77232	3.53135	1.34242
9010-2	9010	9010-2	1.20412	1.17609	0	0	0	0	1.23045	3.01787	0	1.30103	1.27875	0	2.3075	1.07918	0.954243	0	1.41497	0	0	0	0	0	1.36173	1.11394	2.01284	0	0	1.27875	0	0	0	0	0	0	0	0	0	0	0	0	0.69897	2.33041	1.04139	1.97772	2.51188	3.31492	1
9010-3	9010	9010-3	0.30103	0.845098	0	0	0	0	0.954243	2.98182	0	1.20412	1.07918	0	2.16137	1.11394	0.90309	0	1.38021	0	0	0	0	0	1.49136	0	1.716	0	0	0.69897	0	0	0	0	0	0	0	0	0	0	0	1.17609	0	2.16435	1.04139	1.75587	2.55023	3.29667	0.30103
9013-2	9013	9013-2	0.90309	0.954243	0	0	0	0	0	3.07773	0	1.39794	1.23045	0	2.40654	1.14613	0.69897	0	1.27875	0	0	0	0	0	0.778151	1.23045	2.12385	0	0	0.477121	0	0	0	0	0	0	0	0	0	0	0.477121	0	0	2.41497	0.69897	1.96848	2.64147	3.40875	1
9013-1	9013	9013-1	0.778151	0.477121	0	0	0	0	0	3.27623	0	1.38021	1	0.845098	2.40483	1.36173	0	0.60206	1.54407	0	0	0	0	0	1.17609	0	1.93952	0	0	1.11394	0	0	0	0	0	0	0	0	0	0	0.477121	0	0.69897	2.29447	0.778151	1.81954	2.6902	3.44685	1.20412
9013-3	9013	9013-3	0	0.60206	0	0	0	0	0.778151	2.66652	0.845098	1.11394	1.27875	0.778151	2.51188	1.4624	0.69897	0	1.34242	0	0	0	0	0	0.60206	1.39794	1.70757	0	0	1.23045	0	0	0	0	0	0	0	0	0	0	0.60206	0	0	2.50379	0.954243	2.09691	2.58995	3.51402	1.43136
9015-3	9015	9015-3	0	0.60206	0	0	0	0	0.954243	2.63949	0.778151	1.23045	1.07918	0	2.62221	1.4624	0.90309	0	1.36173	0	0	0	0	0.30103	1.27875	0	1.30103	0	0	1	0	0	0	0	0	0	0	0	0	0	0.954243	1	0.90309	2.55871	1.23045	2.18469	2.81425	3.53895	1.38021
9015-1	9015	9015-1	0.60206	0.69897	0	0	0	0	1.20412	3.06483	0.954243	1.4624	1	0	2.45788	1.23045	0.60206	0.60206	1.14613	0	0	0	0	0	0.90309	0.90309	1.72428	0	0	1.25527	0	0	0	0	0.30103	0	0	0	0	0	0	0	0	2.43457	0.954243	2.13672	2.62737	3.42488	1.36173
9015-2	9015	9015-2	1.20412	0.778151	0	0	0	0	0	3.17143	0	1.38021	0.778151	0.477121	2.26007	1.17609	0.845098	0	1.47712	0	0	0	0	0.778151	1.30103	0	1.74036	0	0	0.30103	0	0	0	0	0	0	0	0	0	0	0	0.69897	0	2.17898	0.477121	1.81954	2.50379	3.34044	0.778151
9016-3	9016	9016-3	0	0	0	0	0	0	1.38021	2.68842	1.04139	1.32222	1.14613	0.90309	2.45637	1.32222	0	0.69897	0	0.60206	0	0	0	0	1.34242	1.27875	1.76343	0.778151	0	1.44716	0.69897	0	0	0	0	0	0	0	0	0	1.27875	1.04139	1.25527	2.27646	1.39794	2.23553	2.90687	3.59824	1.5563
9016-1	9016	9016-1	0.60206	0.778151	0	0	0	0	1.11394	3.01157	0	1.25527	1.11394	0	2.26007	0.60206	0.477121	0	1.32222	0	0	0	0	0	1.32222	1.20412	1.5682	0	0	0.69897	0	0	0	0	0	0	0	0	0	0	0	0	1.17609	2.17319	1	1.91381	2.70757	3.36884	1
9016-2	9016	9016-2	1.39794	1	0.69897	0	0	0	1.23045	3.0162	0	1.25527	0.90309	0	2.2833	1.14613	0.778151	0	1.41497	0	0	0	0	0	1.51851	0	1.8451	0	1	0.69897	0	0	0	0	0	0	0	0	0	0	0	0	0	2.16732	0.845098	1.78533	2.57749	3.36455	1.11394
9017-2	9017	9017-2	0.477121	0.90309	0	0	0	0	1.25527	2.99123	0	1.14613	0.90309	0	2.34242	1.04139	0	0	1.51851	0	0	0	0.845098	0	1.30103	1.77085	1.88081	0	0	1.74036	0.477121	0	0	0	0	0.30103	0	0	0	0.845098	0	0	0.90309	2.18752	1	1.95424	2.83315	3.33566	1.27875
9017-3	9017	9017-3	0	0	0	0	0	0	1.04139	2.50106	0.60206	1.32222	1.07918	1.04139	2.53275	1.5682	0	0	0.954243	0.60206	0	0	0	0	1.07918	2.07555	1.4624	0	0	1.53148	0	0	0	0	0	0	0	0	0	0	0.778151	0.954243	0	2.35984	1.39794	2.14922	2.83759	3.53339	1.23045
9017-1	9017	9017-1	0.30103	0.778151	0	0.60206	0	0	1.5563	2.9345	0.477121	1.14613	0.60206	0.69897	2.34044	1.14613	0.845098	0	1.65321	0	0	0	0	0	1.14613	2.17319	2.01284	0	0	1.5682	0	0	0	0	1.07918	0	0	0	0	0	0	0	1	2.19312	1	2.02531	2.55267	3.36286	1.04139
9018-1	9018	9018-1	0.60206	0.60206	0	0	0	0	0	3.2188	0	1.32222	0	0	2.1271	1.17609	0	0	1.49136	0	0	0	0	0	0.60206	1.04139	2.00432	0	0	0	0	0	0	0	0	0	0	0	0	0	0	0	0	2.20683	1.04139	1.81954	2.60959	3.31006	1.07918
9018-2	9018	9018-2	0.69897	0.778151	0	0	0.60206	0	0.954243	2.98318	0.778151	1.41497	0	0	2.1271	1.04139	0	0	1.17609	0	0	0	0	0	0.60206	1.20412	0	0	0	1.23045	0	0	0	0	0	0	0	0.30103	0	0	0	0.69897	0.954243	2.29885	0.954243	1.90849	2.49831	3.27989	1
9018-3	9018	9018-3	0	0	0	0	0	0	0	2.70157	0	1.20412	0.69897	0.90309	2.62737	1.63347	0.90309	0	1.25527	0	0	0	0	0	1.30103	0.954243	1.34242	0	0	0.60206	0	0	0	0	0	0	0	0	0	0	0.60206	0	0.69897	2.33846	0.845098	1.99564	2.69461	3.65273	1.5563
9019-1	9019	9019-1	0.954243	0.30103	0	0	0	0.477121	0	3.34869	0.30103	1.38021	1	0	2.23805	1	0.69897	0	1.36173	0.477121	0	0	0	0	1.44716	0	1.6902	0	0	0	0	0	0	0	0.60206	0	0	0	0	0	0.60206	0	1.11394	2.20412	0.954243	1.93952	2.7364	3.45301	1.14613
9019-2	9019	9019-2	1	0.778151	0	1.32222	0.69897	0	1.41497	2.98046	1	1.44716	1.25527	0.477121	1.04139	0.477121	1.38021	1	2.26245	0	0	0	1.11394	0	1.8451	2.07918	2.04532	0	0.69897	1.98677	0	1	0.69897	1.77815	0	0	0	0	0.477121	0	1.20412	1.30103	1.20412	2.26245	1.30103	2.03342	2.52892	3.1271	0.69897
9019-3	9019	9019-3	0.778151	1.04139	0	0	0	0	0.954243	3.0162	0	1.17609	1.25527	0.69897	2.33041	1.20412	0.477121	0	1.34242	0	0	0	0	0	1.11394	1.11394	2.04139	0	0	0	0	0	0	0	0	0	0	0	0	0	1.11394	1	0.60206	2.13354	0.90309	1.62325	2.42813	3.30984	0
9020-2	9020	9020-2	1.07918	0.845098	0	0.477121	0	0	1.38021	3.09026	0	1.27875	0.954243	0	2.2014	1.20412	0	0	1.36173	0	0	0	0	0	0.778151	0.69897	1.86923	0	0	0	0	0	0	0	0	0	0	0	0	0	1.04139	0.477121	0	2.13354	0.69897	1.8451	2.70501	3.36511	1.32222
9020-1	9020	9020-1	0.90309	0	0	0	0	0	1.07918	3.21801	0	1.34242	1.27875	0	2.35984	0	0.69897	0	1.49136	0	0	0	0	0	1.34242	0	1.98227	0	0	0	0	0	0	0	0	0	0	0	0	0	0.477121	0	0.778151	2.17609	1.20412	1.96379	2.7348	3.40243	1.36173
9020-3	9020	9020-3	0	0	0	0	0	0	0	2.81558	0.30103	1	0.954243	0	2.51055	1.61278	0.845098	0	1.07918	0	0	0	0	0	0.69897	0	0	0	0	1.07918	0	0	0	0	0	0	0	0	0	0	0.69897	0	1.07918	2.29003	0.954243	1.96848	2.66652	3.51014	1.23045
9021-3	9021	9021-3	0.30103	0	0	0	0.845098	0.477121	1.20412	2.81954	0	1.34242	1.27875	1.04139	2.65321	1.27875	1.23045	0.778151	1.14613	0	0	0	0	0	1.25527	1.36173	1.76343	0	0	1.36173	0	0.60206	0	0	0	0	0	0	0	0	1.14613	1.23045	0.954243	2.57749	1.38021	2.32634	2.88252	3.66642	1.5563
9021-1	9021	9021-1	0.845098	0	0	0	0	0	0.778151	2.98722	0.477121	1.47712	0.60206	0.60206	2.29667	0.954243	0.477121	0	1.43136	0	0	0	0	0	1.39794	0	1.74819	0	0	0.954243	0	0	0	0	0	0	0	0	0	0	0.30103	0	0	2.20952	1	1.95904	2.62325	3.30621	1.32222
9021-2	9021	9021-2	0.845098	1.07918	0	0	0	0	1.23045	2.99123	0.477121	1.23045	1.07918	0.477121	2.27184	1.20412	0.90309	0	1.25527	0	0	0	0.30103	0	1.17609	0	1.78533	0	0	0	0.30103	0	0	0	0	0	0	0	0	0	0	0	0	2.24797	0.954243	1.89209	2.44091	3.31069	1.07918
9023-1	9023	9023-1	0	0	0	0	0	0	0.69897	2.48287	0.477121	1.41497	1.11394	0	2.46982	1.27875	0	0	1.49136	0	0	0	0.778151	0	1.38021	1.34242	1.44716	0	0	1.43136	0	0	0	0	0.778151	0	0	0	0	0	1.25527	0.69897	1.20412	2.3927	1.11394	2.1038	2.89042	3.49206	1.23045
9023-2	9023	9023-2	0	0	0	0	0	0	1.04139	2.49136	0	1.44716	1.20412	0	2.50106	1.38021	0	0.69897	1.36173	0	0	0	0.60206	0	0.90309	1.32222	0	0.477121	0	1.39794	0	0.778151	0	0	0	0	0	0	0	0	0.778151	0.90309	1.27875	2.32222	1.20412	2.03743	2.83885	3.5042	1.34242
9023-3	9023	9023-3	0.69897	0.778151	0	0	0	0	1.27875	2.91009	0	1.41497	0.954243	0	2.24304	1.25527	1.04139	0	1.66276	0	0	0	0	0.845098	1.11394	0	1.85126	0	0	1	0.778151	0	0	0	0	0	0	0	0	0	0.90309	0	1.04139	1.99564	0	1.62325	2.54654	3.23779	1.30103
9026-2	9026	9026-2	1.07918	0.845098	0	0	0	0	0.69897	3.16673	0	1.38021	1.23045	0	2.21219	1.30103	0	0	1.39794	0	0	0	0	0	1.20412	0	1.97772	0	0	0	0	0	0	0	0	0	0	0	0	0	0	0.60206	0	2.22272	0.90309	1.89209	2.60097	3.38525	1.25527
9026-1	9026	9026-1	1.17609	0	0	0	0	0	1.32222	3.14239	0	1.17609	1.04139	0	2.29667	1.34242	0	0	1	0	0	0	0	0	0	0	1.92428	0	0	0	0	0	0	0	0	0	0	0	0	0	0.778151	0	0	2.1271	0	1.97313	2.78888	3.43696	1.11394
9026-3	9026	9026-3	0	0	0	0	0	0	0	2.79727	0	1.36173	1	0.90309	2.57403	1.81291	0.60206	0	1.25527	0	0	0	0	0	1.17609	0	1.57978	0	0.954243	0	0	0	0	0	0	0	0	0	0	0	1.27875	0	0	2.38561	1.07918	2.21748	2.70586	3.68224	1.38021
9027-3	9027	9027-3	0	0.60206	0	0	0	0	1.14613	2.70329	0.90309	1.27875	1.04139	0.90309	2.63246	1.38021	1.04139	0	1	0	0	0	0.30103	0	1.34242	1	1.716	0	0	1	0.477121	0	0	0	0	0	0	0	0	0	0.845098	0.477121	0	2.63246	1.11394	2.2014	2.66276	3.61941	1.66276
9027-1	9027	9027-1	1	1.04139	0	0	0	0	1.34242	2.99913	0	1.11394	0.69897	0.69897	2.25285	1	0.954243	0	1.54407	0	0	0	0	0	1.04139	0.954243	1.83885	0	0	0.477121	0	0	0	0	0	0	0	0	0	0	0	0.778151	1.23045	2.24551	1.04139	1.87506	2.54777	3.25503	1.17609
9027-2	9027	9027-2	0.60206	0.69897	0	0	0	0	0.845098	3.03743	0.69897	1.23045	0.69897	0	2.26007	1.14613	0	0	1.39794	0	0	0	0	0	1.44716	0	1.96379	0	0	0.69897	0	0	0	0	0	0	0	0	0	0	0	0	0	1.88649	0.69897	1.80618	2.47567	3.29973	1.17609
9028-3	9028	9028-3	0	0.30103	0	0	0	0	1.20412	2.59988	1	1.23045	1.38021	0.69897	2.72673	1.92942	0	0	1.11394	0	0	0	0	0	1.04139	1.17609	0	0	0	1.07918	0	0	0	0	0	0	0	0	0	0	0.90309	0.778151	1.23045	2.47422	1.11394	2.23805	2.89209	3.6733	1.44716
9028-1	9028	9028-1	1.14613	1.32222	0	0.69897	0	0	1.36173	3.14706	0	1.30103	0	0.30103	2.33244	1.17609	0	0	1.43136	0	0	0	0	0	1.11394	1.38021	2.07555	0	0	0.778151	0	0	0	0	0	0	0	0	0	0	0	0	0.477121	2.33041	0.69897	1.92428	2.76492	3.45728	1.39794
9028-2	9028	9028-2	1	1.23045	0	0	0	0	1.39794	3.07918	0.90309	1.07918	1.07918	0.477121	2.41664	1.49136	0	0	1.25527	0	0	0	0	0	1.14613	1.11394	1.99564	0	0	1.20412	0	0	0	0	0	0.477121	0	0	0	0	0	0.477121	0	2.12057	0.60206	2.01703	2.57287	3.43965	1.20412
9029-2	9029	9029-2	0.69897	0.30103	0	0	0	0	1.04139	3.08171	0.90309	1.27875	0.60206	0.30103	2.41664	1.47712	0.477121	0	1.50515	0	0	0	0	0	1.11394	0	1.69897	0	0	0.90309	0	0	0	0	0	0	0	0	0	0.477121	0	0	0.778151	2.20683	0.778151	1.8451	2.70757	3.49332	1.25527
9029-1	9029	9029-1	0	0.954243	0	0	0	0	1.25527	2.77525	0.954243	1.30103	1.11394	1.25527	2.72916	1.65321	0.60206	0	1.41497	0	0	0	0	0	1.41497	1.30103	1.68124	0.60206	0	1.23045	0.60206	0	0	0	0.60206	0	0	0	0	0	0.90309	0.845098	1.04139	2.63246	1.43136	2.4014	2.95231	3.6835	1.6902
9029-3	9029	9029-3	0.90309	0.90309	1	0	0	0	1.23045	2.92531	0.477121	0.778151	1.07918	0.90309	2.29226	1.25527	0.778151	0.60206	1.5682	0	0	0	0	0	1.23045	1.34242	2.06819	0	0	0.778151	0	0	0	0	0.69897	0	0	0	0	0	0	0.477121	0	2.06446	0.778151	1.76343	2.32634	3.2222	1.20412
9031-3	9031	9031-3	0	0.60206	0	0	0	0	1.4624	2.82866	1.17609	1.4624	1.41497	1	2.32838	1.14613	1.20412	0.778151	1.53148	0	0	0	1.51851	0	1.23045	2.76042	1.86332	0	1.17609	2.05308	0	1.17609	0	1.8451	0.60206	0	0	0	0	0	1	0.778151	1	2.35025	1.51851	2	2.65801	3.3566	1.39794
9031-1	9031	9031-1	0	0.30103	0	0	0	0	1.14613	2.72346	0.845098	1.43136	1.23045	0	2.4133	1.07918	0	0	0	0	0	0	0	0	0.60206	1.73239	0	0	0	1.54407	0	0	0	0	0	0	0	0	0	0	0.845098	0	1.11394	2.45939	0	2.12385	2.79727	3.49402	1.14613
9031-2	9031	9031-2	1.49136	1.20412	0	0.954243	0	0	1.36173	2.98453	1.49136	1.39794	1.44716	0.60206	1	0	1.60206	1.47712	2.45788	0	1.30103	0	0	0	2.13354	2.43136	1.41497	0	0	1.73239	1.04139	1.20412	0	0	0	0	0	1.04139	1.11394	0	1.4624	1.41497	0	2.30963	1.27875	1.74819	2.51983	3.1758	1.04139
9033-1	9033	9033-1	0	1.23045	0	0	0.477121	0	0	2.72835	0.30103	1.39794	1.14613	0.845098	2.49831	1.07918	0.845098	0	1.23045	0	0	0	0	0	1.04139	0	1.54407	0	0	0	0	1.11394	0	0	0	0	0	0	0	0	0	0.778151	1.36173	2.30103	1.11394	2.06819	2.78746	3.53275	1.27875
9033-2	9033	9033-2	0.845098	0.477121	0	0	0	0	1.20412	2.98989	0	1.25527	0.845098	0	2.31806	1.11394	0.778151	0	1.47712	0	0	0	0	0	1.20412	1.11394	1.96379	0	0	0.845098	0	0	0	0	0	0	0	0	0	0	0	0	0.30103	2.19312	1.04139	2.01284	2.49554	3.2403	1.11394
9033-3	9033	9033-3	0.60206	1.75587	0	0	0	0	1.11394	2.61909	0.90309	0.90309	1.07918	1.04139	2.88705	2.07555	1.17609	0	1.14613	0	0	0	0	0	1.23045	0	1.76343	0	0	1	0	0	0	0	0	0	0	0	0	0	0.69897	0.954243	0.954243	3.05767	1.23045	2.13033	3.06371	3.64865	1.49136
9034-1	9034	9034-1	1.20412	1.04139	0	1	0	0	1.47712	3.12057	0.90309	1.39794	1	0	2.50651	1.43136	1.04139	0	1.6721	0	0	0	0	0	1.44716	1.73239	2.24797	0	0	1.66276	0	0	0	0	1.17609	0	0	0	0	0.60206	0	0	1	2.38382	1.11394	2.08991	2.69197	3.42813	1.27875
9034-3	9034	9034-3	0.954243	1.23045	0	0.60206	0	0	1.39794	2.92531	0.69897	1.51851	0.845098	0	1.82607	0.954243	1.17609	0	1.90309	0	0	0	0.477121	0	1.57978	1.36173	1.92428	0	0	1.65321	0	0	0	0.477121	0	0	0.477121	0.30103	0	0	0	1.14613	0	2.08991	1.20412	1.93952	2.50243	3.20548	0.60206
9034-2	9034	9034-2	0.69897	0.845098	0	0	0	0	0.477121	3.15198	0	1.34242	0.845098	0	2.32015	1.11394	0	0	1.34242	0	0	0	0	0	1.14613	1.17609	1.77085	0	0	0.69897	0	0	0	0	0	0	0	0	0	0	0	0.60206	0.60206	2.22531	1.04139	1.81291	2.62531	3.39217	1.20412
9035-3	9035	9035-3	0.954243	0.90309	0	0	0	0	0	3.11826	0	0.90309	1.07918	0	2.30963	1.23045	0.845098	0	1.60206	0	0	0	0	0	1.41497	1.20412	1.63347	0	0	1	0	0	0	0	0	0	0	0	0	0	0	1.07918	0	2.22531	0	1.8451	2.48572	3.42226	1.30103
9035-2	9035	9035-2	0.778151	1	0	0	0	0	1	3.17551	0	1.39794	1.14613	0	2.28556	1.23045	0.69897	0	1.53148	0	0	0	0	0	1.36173	0	1.81954	0	0	0.69897	0	0	0	0	0	0	0	0	0	0	0.845098	0	0.90309	2.26245	0.954243	1.77085	2.51851	3.40192	1.04139
9035-1	9035	9035-1	0.477121	0.477121	0	0	0	0	1.11394	3.25285	0	1.20412	1	0.477121	2.34439	1.23045	1	0	1.54407	0	0	0	0	0	1.36173	0	1.81291	0	0	0.954243	0	0	0	0	0	0	0	0	0	0	0.60206	0	0.845098	2.12057	1.20412	1.8451	2.52634	3.447	0.845098
9036-1	9036	9036-1	0.60206	0	0	0	0	0	1.36173	3.01953	1	1.34242	1	0.90309	2.5092	1.25527	0	0	1.4624	0	0	0	0	0	1.07918	1.65321	1.95424	0	0.60206	1.30103	0	0	0	0	0.954243	0	0.60206	0	0	0	0	0.90309	0.845098	2.63749	1.11394	2.14613	2.67302	3.41111	1
9036-2	9036	9036-2	0	0.60206	0	0	0	0	1.04139	2.93247	0	1	0.69897	0	2.39967	1.5563	0.60206	0	1.38021	0	0	0	0	0	0.60206	0	1.77815	0	0	1.27875	0	0	0	0	0	0	0	0	0	0	0	0	0	2.2014	0.90309	1.90309	2.60314	3.43981	0.954243
9036-3	9036	9036-3	0	0	0	0	0	0	0	2.90363	0.60206	1.20412	0.954243	0.845098	2.69984	1.81954	0.778151	0	1.07918	0	0	0	0	0	1.17609	1.07918	1.27875	0	0	1.17609	0	0	0	0	0	0	0	0	0	0	1	0.845098	1.11394	2.53656	1	2.05308	2.83315	3.58749	1.47712
9037-2	9037	9037-2	0.90309	1.04139	0	0	0	0	1.07918	3.14768	0.845098	1.4624	0.90309	1	2.26482	1.04139	0.69897	0	1.6902	0	0	0	0	0	1.43136	1.27875	1.90849	0	0	0.845098	0	0	0	0	0	0	0	0	0	0	0.778151	0	0.778151	2.13354	0.954243	1.91908	2.61066	3.39252	0.90309
9037-1	9037	9037-1	0.778151	1.04139	0	0	0	0	1.25527	3.15076	0.90309	1.14613	0	0	2.4133	0.90309	0.90309	0	1.51851	0	0	0	0	0	1.39794	0	1.83251	0	0	0	0	0	0	0	0	0	0	0	0	0	1	0.845098	0.845098	2.27646	0.845098	2.04139	2.64048	3.44716	0.90309
9037-3	9037	9037-3	0.845098	0	0	0	0	0.69897	0.845098	3.1532	0.778151	1.27875	0.778151	0	2.29003	0.477121	0.60206	0	1.43136	0	0	0	0	0	0.90309	1.07918	1.62325	0	0	1.04139	0	0	0	0	0	0	0	0	0	0	0	0.60206	0	2.22531	0.845098	1.44716	2.5302	3.40654	1.20412
9038-3	9038	9038-3	0.845098	1.17609	0	0.30103	0	0	1.53148	2.99432	0.90309	1	0	1.11394	2.35218	1.25527	0.954243	0	1.44716	0	0	1	0	0	1.4624	1.73239	1.98677	0	0	1.65321	0	0	0	0	0	0	0	0	0	0	0	0	0.845098	2.31597	0.90309	2.09691	2.57287	3.32077	1
9038-1	9038	9038-1	0.778151	0	0	0	0	0	0	3.18977	0	1.43136	0	0.477121	2.34044	1.17609	1	0	1.39794	0	0	0	0	0	1.32222	1.07918	1.95904	0	0	1.04139	0	0	0	0	0	0	0	0	0	0	0	0.845098	1.11394	2.42813	1.07918	2.01703	2.68215	3.47026	1.30103
9038-2	9038	9038-2	0.477121	0	0	0	0	0	0.90309	2.89209	0	1.07918	1	0	2.64444	1.50515	0	0	1.20412	0	0	0	0	0	1.14613	0.845098	2.07555	0	0	1.07918	0	0	0	0.69897	0	0	0	0	0	0	0	0.30103	0.954243	2.4609	1.04139	2.13988	2.91908	3.55509	1.49136
9039-3	9039	9039-3	1.07918	1	0	0.778151	0	0	0.954243	3.10243	0	1.07918	1.04139	0	2.39445	1.30103	1	0	1.50515	0	0	0	0	0	1.4624	1.07918	1.90849	0	0	1.04139	0	0	0	0	0	0	0	0	0.30103	0	0	0	0	2.24797	1	1.89209	2.56585	3.39915	1.23045
9039-1	9039	9039-1	1	0.954243	0	0	0	0	0.954243	3.21192	0	1.4624	0.60206	0	2.30963	0.954243	1	0	1.27875	0	0	0	0	0	1.34242	0	1.83885	0	0	0	0.30103	0	0	0	0	0	0	0	0	0	0	0	0.60206	2.21484	0	1.74036	2.68305	3.37088	0.845098
9039-2	9039	9039-2	0.954243	0	0	0	0	0	1.04139	3.08493	0	1.36173	0.845098	0	2.45788	0.845098	0.60206	0	1.25527	0	0	0	0	0	1.04139	0	1.81954	0	0	0	0	0	0	0	0	0	0	0	0	0	0.778151	0	0	2.29885	0.477121	1.89763	2.60206	3.44012	1.20412
9041-2	9041	9041-2	0.778151	1.04139	0.60206	0	0	0	0	3.19811	0	1.27875	1.04139	0	2.29003	1.25527	0.30103	0	1.20412	0	0	0	0	0	1.27875	0.778151	1.77815	0	0	0.90309	0	0	0	0	0	0	0	0	0	0	0.60206	0.845098	0.845098	2.15534	0.954243	1.97772	2.49554	3.40415	1.20412
9041-1	9041	9041-1	1	1	0	0	0	0	1.23045	2.99957	0.90309	1.34242	0.90309	0	2.40654	1.11394	1.07918	0	1.49136	0	0	0	0	0	0.90309	1.17609	2.0607	0	0	0.845098	0	0	0	0	0	0	0	0	0	0	0.60206	0	0	2.36173	1.25527	1.95424	2.60853	3.34104	1.07918
9041-3	9041	9041-3	0.69897	1.04139	0	0	0	0	0.30103	3.28421	0	1.14613	0.90309	0	2.35218	1.04139	0	0	1.41497	0	0	0	0	0	0.845098	0	1.85126	0	0	0.60206	0	0	0	0	0	0	0	0	0	0	0.90309	0	0.60206	2.1271	0.69897	1.82607	2.46835	3.42975	1.17609
9043-3	9043	9043-3	0	0	0	0	0	0	0.477121	2.57864	0	1.14613	1.34242	0.954243	2.62839	1.60206	0	0	1.23045	0	0	0	0	0	0	1.20412	0	0	0	1.32222	0	0	0	0	0	0	0	0	0	0	0.60206	0.477121	0.69897	2.4216	1.30103	2.23553	2.70842	3.54145	1.14613
9043-1	9043	9043-1	0.30103	0	0	0	0	0	0	2.98046	0.954243	1.39794	1.17609	0.69897	2.65128	1.72428	1.07918	0	1.30103	0	0	0	0	0	1.17609	1	1.65321	0	0	1.14613	0	0	0	0	0.477121	0	0	0	0	0	1	0.778151	1	2.41996	1.11394	2.24797	2.74036	3.57415	1.50515
9043-2	9043	9043-2	0	1.07918	0	0	0	0	1.07918	3.1271	0	1.25527	0.954243	0.30103	2.26007	1.41497	1	0	1.04139	0	0	0	0	0	1.34242	0	1.62325	0	0	0	0	0	0	0	0	0	0	0	0	0	0	0.60206	1	2.18752	0.845098	1.75587	2.67578	3.3731	1.30103
9046-1	9046	9046-1	0.60206	1.04139	0	0	0	0	0.954243	3.23553	0	1.5563	0.60206	0	2.40654	0.845098	0	0.69897	1.47712	0	0	0	0	0	1.11394	0	1.61278	0	0	1.14613	0.60206	0	0	0	0	0	0	0	0	0	0	0	0.845098	2.17609	0.845098	1.83885	2.77597	3.4853	1.11394
9046-2	9046	9046-2	0	0.60206	0	0	0	0	1.04139	2.98363	0	1.34242	1.17609	0	2.26007	0.954243	0.69897	0	1.44716	0	0	0	0	0	1.30103	0	1.99123	0	0	1.17609	0	0	0	0	0	0	0	0	0	0	0	0	0.60206	2.13033	0.69897	1.66276	2.51055	3.27091	1.07918
9046-3	9046	9046-3	0	0.477121	0	0	0	0	0.60206	2.73799	0.69897	1.25527	1.20412	1.11394	2.74586	1.5682	0.845098	0	0.845098	0	0	0	0	0	1.30103	1.14613	1.20412	0	0	1.30103	0	0	0	0	0	0	0	0	0	0	1.23045	0	0.30103	2.52892	1.20412	2.26007	2.54033	3.67052	1.57978
9052-1	9052	9052-1	1	0.60206	0	0	0.477121	0	1.38021	3.02036	0.778151	1.53148	0.90309	0	2.24797	0.954243	0	0	1.27875	0	0	0	0	0	1.38021	1.57978	1.62325	0	0	1.25527	0	0	0	0	0	0	0	0	0	0	0	0	0.90309	2.0086	1.11394	1.92428	2.58995	3.22583	1.17609
9052-2	9052	9052-2	0.778151	0.30103	0	0.477121	0	0	1.04139	3.02243	0.69897	1.20412	0	0	2.32428	1	0.954243	0	1.23045	0	0	0	0	0	1.14613	0	1.83885	0	0	0.778151	0	0	0	0	0	0	0	0	0	0	0.954243	1.11394	0.778151	1.79239	0.954243	1.74036	2.59439	3.36436	1.27875
9052-3	9052	9052-3	0	0.60206	0	0	0	0	1.11394	2.60746	0	1.30103	1.04139	0.778151	2.60423	1.49136	0	0	1.30103	0	0	0	0	0	1.11394	1.07918	1.44716	0	0	1.20412	0.69897	0	0	0	0	0	0	0	0	0	0.778151	0.90309	1	2.26717	1.41497	2.16732	2.8537	3.57634	1.34242
9053-2	9053	9053-2	1	0.90309	0	0	0	0	0	3.17667	0	1.25527	0.845098	0.30103	2.34439	1.20412	0	0	1.4624	0	0	0	0	0	1.32222	0	1.98227	0	0	0.90309	0.778151	0	0	0	0	0	0	0	0	0	1.04139	0.90309	0.69897	2.11059	0.778151	1.83251	2.51587	3.37731	1.07918
9053-3	9053	9053-3	1.07918	1.17609	0	0	0	0	1.38021	3.00346	0	1.36173	0.778151	0	2.42488	1	1.20412	0.69897	1.5682	0	0	0	0	0	1.59106	0	2.0086	0	0	1.17609	0	0	0	0	0	0	0	0	0	0	0	0.778151	0	2.21484	0.60206	1.6902	2.48714	3.33726	1.17609
9053-1	9053	9053-1	0.60206	0.69897	0	0	0	0	1.04139	2.92788	0.30103	1.20412	0.845098	0.845098	2.58092	1.34242	0.954243	0	1.44716	0	0	0	1.04139	0	1.27875	1.14613	1.66276	0	0	0.90309	0	0	0	0	0	0	0	0	0	0	0.778151	0.845098	0.954243	2.45025	1.23045	2.26007	2.87216	3.53719	1.43136
9054-1	9054	9054-1	0.69897	1	0	0	0	0	1.11394	3.1758	1.07918	1.38021	0	0	2.38561	1.11394	0.778151	0	1.38021	0	0	0	0	0	1.20412	0	1.82607	0	0	0	0.477121	0	0	0	0	0	0	0	0	0	0	0	0.845098	2.22272	1	1.89763	2.73078	3.35122	1.30103
9054-2	9054	9054-2	0.845098	0.60206	0	0	0	0	0.60206	3.08422	0	1.17609	1.11394	0	2.25527	1.23045	0	0	1.5682	0	0	0	0	0	1.36173	0.90309	1.716	0	0	0.778151	0.477121	0	0	0	0	0	0	0	0	0	0.778151	0.69897	0	2.27184	0	1.79239	2.70586	3.3166	0.954243
9054-3	9054	9054-3	0	0	0	0	0	0	1.27875	2.8704	0.69897	1.25527	1.20412	1.04139	2.59439	1.53148	0.90309	0	1.41497	0.845098	0	0	0	0	1.5563	1.47712	0	0	0	1.23045	0	0	0	0	0	0	0	0	0	0	0.60206	0.60206	0	2.51188	1.39794	2.2878	2.81491	3.5397	1.51851
9056-1	9056	9056-1	0	0	0	0	0	0	1.11394	2.69285	0.90309	1.51851	1	0.954243	2.63548	1.59106	0	0	1.36173	0	0	1.14613	0	0	1.17609	2.57864	1.64345	0	0	1.43136	0	0	0	0	0	0	0	0	0	0	0	0.60206	1.07918	2.4183	1.23045	2.16732	2.83948	3.49651	1.30103
9056-2	9056	9056-2	1	1	0	0	0	0	1.20412	2.9952	0	1.32222	1	0.778151	2.20412	0.778151	0.778151	0.845098	1.5682	0	0	0	0	0	1.36173	1.97313	1.91908	0	0	1.64345	0	0	0	0	0	0	0	0	0	0	0	0	0	1.97772	0.845098	1.9345	2.55388	3.33244	1.07918
9056-3	9056	9056-3	0.954243	1.11394	0	1.32222	0	0	1.43136	2.92169	0.69897	1.49136	1	0.60206	1.11394	0	1.14613	1.14613	1.93952	0	0.954243	0.69897	0.90309	0.778151	1.68124	1.69897	1.69897	0	0	1.69897	0	0	0	0	0	0	0.477121	1.17609	0	0	0.90309	0.778151	0	2.24055	1.04139	1.69897	2.48287	3.07408	0.778151
9057-2	9057	9057-2	1.04139	0.30103	0	0	0	0	0.69897	3.02857	0.954243	1.23045	0.954243	0	2.30103	1.43136	0.69897	0	1.39794	0	0	0	0	0	1.51851	0	1.6902	0	0	0	0	0	0	0	0	0	0	0	0	0	0	0	0	2.10721	0.845098	1.90849	2.55267	3.42012	0.954243
9057-1	9057	9057-1	0.60206	0.778151	0	0	0	0	0	3.05729	0	1.32222	0.954243	0	2.38021	1.41497	0.477121	0	1.30103	0	0	0	0	0	1.30103	0.69897	1.47712	0	0	0.90309	0.477121	0	0	0	0	0	0	0	0	0	0	0.477121	0.90309	2.29667	1	1.96379	2.74741	3.49485	1.32222
9057-3	9057	9057-3	0	0	0	0	0	0	0	2.56703	0.845098	1.27875	1.39794	1.27875	2.67669	1.38021	0	0	1.30103	0	0	0	0	0	0.954243	1.17609	0	0.60206	0	1.23045	0.477121	0	0	0	0	0	0	0	0	0	0.477121	0	1.04139	2.43457	1.32222	2.24304	2.77085	3.57089	1.59106
9059-2	9059	9059-2	0.90309	1.32222	0.778151	0	0	0	1.44716	2.9952	0	1.20412	1.20412	0.69897	2.13354	1.17609	0	0.60206	1.5563	0	0	0	0	0	1.36173	0	2	0	0	1.27875	0	0	0	0	0	0	0.69897	0	0	0.778151	0	0.845098	0	2.06446	1.11394	1.83251	2.58883	3.36135	1.20412
9059-3	9059	9059-3	0.477121	1	0	0	0	0	1.32222	2.95904	0.30103	1.23045	0.90309	1	2.54158	1.50515	0	0.69897	1.59106	0	0	0	0	0	1.39794	1.97772	2.03342	0	0	1.76343	0	0.69897	0	1.04139	0	0	0	0	0	0	0	1.04139	1	2.38202	1.11394	2.13988	2.70415	3.43712	1.11394
9059-1	9059	9059-1	1.07918	0	0	0	0	0	1	3.03463	0	1.20412	0.845098	0.30103	2.25042	0.778151	0.60206	0	1.20412	0	0	0	0	0	1.49136	0.954243	1.57978	0	0	0.90309	0.477121	0.69897	0	0	0	0	0	0	0	0	0	0	0.954243	2.20952	0	1.80618	2.71096	3.35965	0.90309
9060-2	9060	9060-2	0.60206	0	0	0.477121	0	0	0	3.06221	0	1.44716	1	0.30103	2.24797	1.32222	0.778151	0	1.43136	0	0	0	0	0	1.27875	1.23045	1.89763	0	0	0.954243	0	0	0	0	0	0.69897	0	0	0	0	0	0.69897	0	2.28556	0.90309	1.78533	2.45332	3.35774	1.27875
9060-3	9060	9060-3	0	0	0	0	0	0	0	2.49415	0	0.778151	0.954243	0.845098	2.53148	1.74036	0.954243	0	1.39794	0	0	0	0	0	0.90309	1.04139	0	0	0	0.954243	0	0	0	0	0	0	0	0	0	0	0	0	1.17609	2.41497	1.11394	2.06446	2.83696	3.60163	1.30103
9060-1	9060	9060-1	0	0.778151	0	0	0	0	1.14613	3.21085	0.69897	1.23045	1.20412	0.845098	2.39094	1.14613	0.60206	0	1.39794	0	0	0.60206	0	0	1.34242	0.90309	1.94939	0	0.60206	1	0	0	0	0	0	0	0	0	0	0	0.69897	0.30103	0.60206	2.20412	0.69897	1.90849	2.72673	3.3822	1.32222
9144-1	9144	9144-1	0	0.778151	0	0	0	0	0	2.96237	0	1.23045	1.14613	0	2.4216	1.14613	0	0	1.25527	0	0	0	0	0	1.20412	0	0	0	0	0.90309	0	0	0	0	0	0	0	0	0	0	0	0.477121	1.07918	2.01284	0.954243	1.89209	2.74351	3.47683	1.11394
9144-2	9144	9144-2	1.41497	1.07918	0	0	0	0	1.11394	3.17955	0.778151	1.04139	1.25527	0.845098	2.4216	1.36173	0	0	1.54407	0	0	0	0	0	1.36173	1.14613	1.99123	0	0	1	0	1	0	0	0	0	0	0	0	0	0	0.69897	1	1.92942	0.69897	1.91381	2.55871	3.43169	1.34242
9144-3	9144	9144-3	0	0.30103	0	0	0.30103	0	1	2.77597	1.14613	1.36173	1.07918	0	2.59218	1.6721	0	0	1.30103	0	0	0	0.69897	0	1	0	1.14613	0	0	1.34242	0.60206	0	0	0.69897	0.30103	0	0	0	0	0	1.07918	0	1.27875	2.27646	1.17609	2.03743	2.71933	3.60455	1.44716
9145-1	9145	9145-1	0	0.477121	0	0	0.60206	0	1.04139	2.75967	1.20412	1.50515	1.39794	0	2.53529	1.23045	0.90309	0	1.25527	0	0	0	0	0	1.34242	0	1.4624	0	0	1.27875	0	0	0	0	0.30103	0	0	0	0	0	0.69897	1.14613	1.41497	2.3927	1.07918	2.28556	2.99167	3.59461	1.53148
9145-2	9145	9145-2	0.778151	0.845098	0	0	0	0	1.14613	3.09132	0	1.51851	1.23045	0	2.32634	1.04139	0	0	1.38021	0	0	0	0	0	1.49136	0	1.83885	0	0	0	0	0	0	0	0.69897	0	0	0	0	0	0	0	0.477121	2.19312	1.23045	1.92428	2.62839	3.30685	1
9145-3	9145	9145-3	1.07918	1.04139	0	0	0	0	1.11394	2.96661	0	1.11394	0.60206	0.69897	2.12057	1.11394	0	0	1.62325	0	0	0	0	0	1.36173	0	1.86923	0	0	0.954243	0	0	0	0	0	0	0.477121	0	0	0	0	0	0	2.11727	0.477121	1.95424	2.53148	3.27989	1.17609
9146-2	9146	9146-2	0.60206	1	0	0	0	0	0.778151	3.13386	0	1.20412	1.11394	0.60206	2.26951	1.4624	0	0	1.41497	0	0	0	0	0	1.25527	1.53148	1.95424	0	0	1.11394	0	0	0	0	0	0	0	0	0	0	0	0	0.778151	2.17609	0	1.9345	2.56937	3.3681	1
9146-1	9146	9146-1	1	0.30103	0	0	0	0	0.69897	3.07078	0	1.34242	1.36173	0.477121	1.9345	0.778151	1.07918	0	1.53148	0	0	0	0	0	1.36173	0	1.62325	0	0	0	0	0	0	0	0	0	0	0	0	0	0.30103	0	0	2.26245	0.778151	1.85733	2.62325	3.32899	1.04139
9146-3	9146	9146-3	0	0	0	0	0	0	0	2.80072	1.04139	1.07918	1.20412	0.954243	2.66652	1.63347	1	0	1.41497	0	0	0	0	0	1.44716	1.17609	1.32222	0	0	1.27875	0	1.07918	0	0.477121	0	0	0	0	0	0	1.07918	0	0.90309	2.4843	0.954243	2.23805	2.89209	3.68993	1.5563
9147-3	9147	9147-3	0	0.477121	0	0	0	0	0	2.61278	0.954243	1.27875	1.14613	1	2.65418	1.70757	0.845098	0	1.23045	0	0	0	0	0	1.11394	1.23045	1.14613	0	0	1.30103	0	0	0	0	0	0	0	0	0	0	1.11394	0	0.69897	2.43457	1.04139	2.20683	2.80209	3.53517	1.54407
9147-1	9147	9147-1	0	0	0	0	0	0	0.90309	2.82413	0	1.57978	0.778151	0	2.44871	1.07918	0.778151	0	1.07918	0	0	0	0	0	1.38021	1.23045	1.60206	0	0	0.69897	0	0	0	0	0	0	0	0	0	0	0.69897	0.69897	1.30103	2.4133	1.20412	1.98227	2.79309	3.57229	1.30103
9147-2	9147	9147-2	1.17609	1.39794	0	0	0	0	1.32222	3.04454	1.11394	1.17609	1.07918	0.30103	2.3483	1.20412	0.90309	0	1.75587	0	0	0	0	0	1.4624	1	2.17898	0	0	0	0	0	0	0	0	0	0	0	0	0	0	0	0.477121	2.24055	1.17609	2.05308	2.64836	3.3145	1.32222
9148-1	9148	9148-1	0.845098	0.69897	0	0	0	0	0.954243	3.13862	0	1	0.954243	0	2.06446	0.60206	0	0	1.23045	0	0	0	0	0	1.30103	0	1.88649	0	0	0	0	0	0	0	0	0	0	0	0	0	0	0	0.778151	2.11059	0.90309	1.83251	2.69285	3.32449	1.17609
9148-2	9148	9148-2	0.30103	0.845098	0	0	0	0	0.778151	2.88593	0.845098	1.27875	0.954243	0.30103	2.63144	1.38021	0.778151	0.60206	1.20412	0	0	0	0	0	1.30103	0.845098	1.68124	0	0	0.845098	0	0.90309	0	0.845098	0	0	0	0	0	0	0.69897	0.845098	1.20412	2.45484	1.04139	2.12057	2.88252	3.56074	1.63347
9148-3	9148	9148-3	0	0.69897	0	0.477121	0	0	0.90309	2.72835	0.954243	1.36173	1.30103	0	2.60314	1.4624	1.07918	0	1.39794	0	0	0	0	0	0.954243	1.43136	1.68124	0	0	1.39794	0	0	0	0	1.04139	0	0	0	0	0	0	1.04139	1	2.54407	1.34242	2.32015	2.79239	3.59901	1.51851
9149-2	9149	9149-2	1.14613	1.17609	0	0	0	0.845098	0	3.11361	0.477121	1.30103	1.11394	0	2.2878	1.44716	0.845098	0	1.44716	0	0	0	0	0	1.17609	0	1.97313	0	0	0	0	0	0	0	0	0	0	0	0	0	0.30103	0	0	2.26482	0.30103	1.91381	2.6561	3.39358	1.17609
9149-1	9149	9149-1	0.954243	0.30103	0	0	0	0	1.11394	3.20412	0	0.90309	0.69897	0	2.31387	1.07918	0	0	1.04139	0	0	0	0	0	1.32222	0.845098	1.89763	0	0	0	0.30103	0	0	0	0	0	0	0	0	0	0	0	0.60206	2.24551	0.845098	1.64345	2.66652	3.34733	1.04139
9149-3	9149	9149-3	0.954243	1.14613	0	0	0	0	0	3.12743	0.90309	1.14613	0.90309	0.60206	2.2833	1.11394	0.778151	0	1.23045	0	0	0	0	0	1.27875	1.17609	1.93952	0	0	0	0	0	0	0	0	0	0	0	0	0	0	0	0	2.14613	0	1.93952	2.60746	3.40569	1.11394
9150-3	9150	9150-3	1.11394	1.07918	0	0	0	0	0	3.15412	0	1.38021	1.14613	0	2.25527	1.25527	0	0	1.50515	0	0	0	0	0	0	0	1.78533	0	0	0.954243	0	0.69897	0	0	0	0	0	0	0	0	0.60206	1.04139	0	2.27646	1.07918	1.9345	2.59988	3.44902	1.30103
9150-1	9150	9150-1	0.69897	0.845098	0	0	0	0	0.69897	3.25551	0.30103	1.27875	0.90309	0.845098	2.37291	1.32222	0.60206	0.477121	1.36173	0	0	0	0	0	1.41497	1	1.78533	0	0	0.30103	0	0	0	0.60206	0	0	0	0	0	0	0	0	0.30103	2.21748	0.954243	1.92428	2.67852	3.39602	1.30103
9150-2	9150	9150-2	0.90309	0.954243	0	0	0	0	1	3.17984	0.477121	1	1.36173	0.30103	2.22789	1.30103	0.69897	0	1.72428	0	0	0	0	0	1.32222	1.30103	1.78533	0	0	0.954243	0	0	0	0	0	0	0	0	0.30103	0	0.60206	0	1.14613	2.04922	1.07918	1.86332	2.61909	3.36642	1.27875
9152-3	9152	9152-3	1.14613	1.07918	0	0	0	0	1.39794	2.89432	0.69897	0.778151	1.27875	0	2.34439	1.20412	0.845098	0	1.5682	0	0	0	0.69897	0	1.23045	1.79239	2.11727	0	0	1.63347	0	0	0	0	0	0	0	0	0.90309	0	0	0	0	2.32838	0.60206	1.96379	2.54531	3.28443	1.27875
9152-1	9152	9152-1	0	0	0	0	0	0	1.34242	2.72835	1	1.25527	1.30103	1	2.7679	1.5682	0.69897	0	1.4624	0	0	0	0.477121	0	0.778151	2.07555	0	0	0	1.54407	0.69897	0	0	0	0.60206	0	0	0	0	0	0	0	1.20412	2.62941	1.07918	2.26951	2.88986	3.59461	1.53148
9152-2	9152	9152-2	0.778151	1.14613	0	0	0	0	1.51851	3.02078	0	0.954243	1.04139	1	2.3927	1.07918	0	0	1.39794	1.07918	0	0	0	0	1.30103	1.82607	1.9345	0	0	1.44716	0	0	0	0	1.11394	0	0	0	0	0	0	0	0	2.43136	1.07918	1.94448	2.57634	3.2938	0.845098
9153-2	9153	9153-2	1.20412	1	0	0	0	0	0	3.13956	0	1.23045	0.778151	0	1.92428	0.778151	0.30103	0	1.49136	0	0	0	0	0	1.34242	0	1.74036	0	0	0.60206	0	0	0	0	0	0	0	0	0	0	0	0	0	2.16732	0.90309	1.83885	2.48287	3.41481	1.41497
9153-1	9153	9153-1	0.69897	0.69897	0	0	0	0	1.32222	3.18724	0	1.20412	1.04139	0	2.3075	0.778151	0	0	1.20412	0	0	0	0	0	1.38021	0	1.86923	0	0	1.04139	0	0	0	0	0	0	0	0	0	0	0	0.90309	0	2.30103	1.27875	2.11394	2.63949	3.3653	1.51851
9153-3	9153	9153-3	0	0.778151	0	0	0	0	1.20412	2.58995	0	1.36173	1.34242	0	2.70927	1.81954	1.14613	0.477121	1.04139	0	0	0	0	0	1.07918	1.89209	1.34242	0	0	1.59106	0	1.04139	0	0	0	0	0	0	0	0.845098	0.954243	0.845098	0	2.63548	1.38021	2.27646	2.74115	3.6193	1.62325
9154-3	9154	9154-3	0	0	0	0	0	0	0.845098	2.43297	0	1.34242	1.14613	0	2.69461	1.43136	0.90309	0	1.14613	0	0	0	0	0	1.27875	0	1.36173	0	0	1.23045	0.30103	0	0	0	0	0	0	0	0	0	0.778151	0	0	2.63849	1.04139	2.19312	2.80956	3.56384	1.47712
9154-1	9154	9154-1	0	0.845098	0.30103	0	0	0	1.14613	3.03262	0	1.27875	1.11394	0.477121	2.38021	1.11394	0	0	1.51851	0	0	0	0.60206	0	0	1.44716	0	0	0	0	0	0	0	0	0	0	0	0	0	0	0	0.477121	1.14613	2.34635	0.845098	2.03342	2.78958	3.47436	1.11394
9154-2	9154	9154-2	0.69897	1.23045	0	0	0	0	1.4624	3.05231	0.30103	1.57978	1	0	2.51983	1.23045	0.778151	0	1.41497	0	0	0	0	0	1.50515	1.716	2.04532	0	0	1.14613	0	0	0	0	0	0	0	0	0	0	0	0	0	2.55267	1.20412	2.14613	2.61278	3.39375	1.44716
9155-1	9155	9155-1	0	0	0	0	0	0	0.69897	2.81624	0.30103	1.27875	0.60206	0.778151	2.49136	1.20412	0.845098	0	1.36173	0	0	0	0	0	1.34242	0	1.36173	0	0	0.954243	0	0.845098	0	0	0	0	0	0	0	0	1	0	1.04139	2.36549	1	1.88649	3.03902	3.51014	1.32222
9155-2	9155	9155-2	1.25527	1.30103	0	0	0.477121	0	0	3.10483	0	1.43136	1.25527	0	2.27875	0	1.17609	0	1.39794	0	0	0	0	0	1.51851	1.20412	2.10721	0	0	1.14613	0	0	0	0	0	0	0	0	0	0	0	0.845098	0	2.26007	1.11394	1.99123	2.48855	3.37383	1
9155-3	9155	9155-3	0	0	0	0	0	0	0.69897	2.97818	1.04139	1.27875	1.07918	0	2.70927	1.73239	0	0	1.41497	0	0	0	0	0	1.11394	1	2.02938	0	0	0	0	1.07918	0.845098	0	0	0	0	0	0	0	1.25527	1.14613	0	2.50515	1.14613	2.3075	2.71767	3.68681	1.5682
9156-1	9156	9156-1	0	0.477121	0	0	0	0	0	2.85914	0	1.27875	0.90309	0.60206	2.60423	1.41497	1.14613	0	1.43136	0	0	0	0	0.69897	1.41497	0	1.50515	0	0	0.954243	0	1.14613	0	0	0.778151	0	0	0	0	0	1.07918	0.60206	1.25527	2.49969	1.11394	2.36922	2.70243	3.60724	1.49136
9156-3	9156	9156-3	0	0	0	0	0	0	0.69897	2.88986	0	1	1.11394	0.60206	2.5302	1.17609	0	0	1.20412	0	0	0	0	0	1.17609	0	0	0	0	0.90309	0	0	0	0	0	0	0	0	0	0	1.04139	0	0	2.32428	0.90309	2.14922	2.59439	3.60724	1.41497
9156-2	9156	9156-2	1.11394	0.845098	0	0	0	0	1.04139	3.09899	0	1.43136	0.778151	0	2.20412	1.11394	1.04139	0	1.41497	0	0	0	0	0	1.17609	0	1.92942	0	0	0	0	0	0	0	0	0	0	0	0	0	0	0	0	2.22272	0	1.88649	2.44248	3.40295	1.14613
9158-3	9158	9158-3	0.845098	0	0	0	0	0	0	2.99388	0	1.23045	0.954243	0	2.38021	1.04139	0.477121	0.60206	1.14613	0	0	0	0	0	0.90309	0.845098	1.77815	0	0	0	0.60206	0	0	0	0	0	0	0	0	0	0	0	0	2.23045	0.845098	1.92942	2.716	3.40773	1.32222
9158-2	9158	9158-2	0.477121	0.845098	0	0	0	0	1.04139	3.04258	0.30103	1.23045	1.11394	0	2.30103	1.11394	0	0	1.27875	0	0	0	0.30103	0	1.34242	0	1.81291	0	0	0.60206	0	0	0	0	0	0	0	0	0	0.477121	0.60206	0.30103	0.60206	2.25285	0.60206	1.74036	2.61805	3.33405	1.27875
9158-1	9158	9158-1	0	0	0	0	0	0	0.778151	2.92737	0	1.50515	0.954243	1	2.50786	1.36173	0.90309	0.845098	1.49136	0	0	0	0	0	1.30103	1.23045	1.38021	0	0	1.32222	0	0	0	0	1	0	0	0	0	0	0.954243	0.954243	1.23045	2.56229	0.954243	2.17898	2.85431	3.56902	1.50515
9159-1	9159	9159-1	0	0	0	0	0	0	1.04139	3.14082	0.778151	1.17609	1.30103	0	2.72754	1.50515	0.778151	0	1.11394	0	0	0	0	0	1.34242	1	1.75587	0	0	0.845098	0	0	0	0	0	0	0	0	0	0	0.69897	0.60206	0.845098	2.34439	0.90309	2.23553	2.85309	3.51693	1.11394
9159-2	9159	9159-2	0	0.778151	0	0	0	0	1.04139	2.97635	0	1.57978	0.845098	0	2.46687	1.36173	0.60206	0	1.34242	0	0	0	0	0	1.20412	1.20412	1.63347	0	0	1.17609	0	0.90309	0	0	0	0	0	0	0	0.30103	0	0.477121	0.69897	2.31387	0.477121	2.14922	2.69636	3.45954	1.27875
9159-3	9159	9159-3	0.954243	1.23045	0	0	0	0	1.62325	2.98227	0.90309	1.5563	1.23045	1.04139	1.96848	0	1.20412	0.90309	1.85126	0	0	0.30103	1.27875	0	1.65321	2.58092	2.05308	0	0.845098	1.92428	0	1.34242	0	1.96379	0.845098	0	0	0.778151	0	0	0	0.778151	0	2.11059	1.14613	1.78533	2.42488	3.15351	0.60206
9160-2	9160	9160-2	0.69897	1.23045	0	0	0	0	1.04139	3.20602	0.778151	0.90309	0	0.477121	2.26717	1.20412	1	0	1.30103	0	0	0	0	0	1.34242	0	2.0086	0	0	0.90309	0	0	0	0	0	0	0	0	0	0	0.477121	0	0.477121	2.13672	0.845098	1.88081	2.81954	3.42894	1.11394
9160-1	9160	9160-1	0	0	0	0	0	0	1.14613	2.79657	1.07918	1.4624	1.11394	0.845098	2.61909	1.23045	0.90309	0.778151	1.11394	0	0	0	0	0	1.36173	1.77815	0	0	0	1.41497	0	0	0	0	1.23045	0	0	0	0	0	0	0.90309	1.25527	2.49831	1.07918	2.28103	2.85248	3.56003	1.51851
9160-3	9160	9160-3	1.07918	0.845098	0	0	0	0	0.69897	2.97955	0	1.27875	0.60206	0.60206	2.35984	0.69897	0	0	1.14613	0	0	0	0	0	1.32222	0	1.72428	0	0	0.845098	0	0	0	0	0	0	0	0	0	0	0	1	0.69897	2.17898	0	1.77815	2.46687	3.33646	1
9163-3	9163	9163-3	0.778151	0.69897	0	0	0	0.477121	1.43136	2.90037	0	1.25527	1.20412	0.778151	2.29447	1.20412	0.954243	0	1.41497	0	0	0	0	0	1.04139	1.78533	1.80618	0	0	1.51851	0	0	0	0	0	0	0	0	0	0	0	1	0	2.20952	0.60206	1.64345	2.47276	3.26316	1.14613
9163-1	9163	9163-1	0	0	0	0	0	0	1.11394	2.85065	0.90309	1.39794	1	0.845098	2.52114	1.47712	0.90309	0	1.25527	0	0	0	0	0	0.845098	1.63347	1.50515	0	0	1.39794	0	0	0	0	0	0	0	0	0	0	0.845098	0	1.04139	2.33445	0.954243	2.21748	2.92686	3.56467	1.34242
9163-2	9163	9163-2	0	0	0	0	0	0	0.954243	2.71096	1.07918	1.32222	1.07918	0	2.57634	1.36173	0	0	1.07918	0	0	0	0	0	0.477121	2.17898	1.61278	0	0	1.53148	0	0.845098	0	0	0.90309	0	0	0	0	0	0.60206	0.778151	0.90309	2.18184	1.07918	1.98677	2.77452	3.47012	1
9167-3	9167	9167-3	0	0	0	0	0	0	0.845098	2.67761	0.60206	1.30103	1	0.60206	2.63347	1.8451	0	0.477121	1.17609	0	0	0	0.60206	0	1.14613	1	1.43136	0	0.477121	1.17609	0	0	0	0.69897	0	0	0	0	0	0	1.23045	0	1.25527	2.18752	0	2.10037	2.62531	3.59594	1.36173
9167-1	9167	9167-1	1.14613	0.90309	0	0	0	0	1.43136	3.21458	0.69897	1.50515	1.17609	0.60206	2.43775	1.20412	0	0	1.54407	0	0	0	0	0	1.49136	1.38021	2.07188	0	0	1.49136	0	0.477121	0	0	0	0	0	0	0	0	0	0	0	2.14613	1	2.13672	2.76567	3.43169	1.39794
9167-2	9167	9167-2	0.845098	0	0	0	0	0	0.845098	3.05956	0	1.54407	0.778151	0	2.27184	0.954243	1.04139	0	1.30103	0	0	0	0	0	1.36173	0.90309	1.68124	0.778151	0	1.25527	0	0	0	0	0	0	0	0	0	0	0.778151	0.778151	0.954243	2.08279	1.14613	1.88081	2.56348	3.42781	1.11394
9168-2	9168	9168-2	1.07918	0.954243	0	0	0.477121	0	0.954243	2.99607	0.30103	1.41497	1.17609	0.60206	2.17609	1.25527	0	0	1.14613	0	0	0	0	0	1.14613	1.20412	2.03342	0	0	0.90309	0	0	0	0	0	0	0	0	0	0	0	0	0	2.18184	0.90309	1.98227	2.56348	3.3189	1.30103
9168-1	9168	9168-1	0	0.30103	0	0	0	0	1.07918	2.55991	0	1.63347	1.07918	0.90309	2.7796	1.65321	0.954243	0	1.04139	0	0	0	0	0	1.07918	1.11394	0	0	0	1.50515	0	0	0	0	0	0	0	0	0	0	0.778151	0	1.30103	2.56937	1.27875	2.29667	2.88986	3.61826	1.5563
9168-3	9168	9168-3	0	0	0	0	0	0	0.69897	2.83822	0.30103	1.14613	1.04139	0.69897	2.53148	1.65321	0.845098	0	1.32222	0	0	0	0	0	1.34242	0	0	0	0	1.11394	0	0	0	0	0	0	0	0	0	0	0	0.778151	0	2.2833	1.14613	2.0607	2.56348	3.53857	1.27875
9169-3	9169	9169-3	0	0	0	0	0	0	0.778151	2.64444	0	1.11394	0	0	2.43297	1.43136	0.60206	0	1.23045	0	0	0	0	0	0.954243	0	1.23045	0	0	0	0	0	0	0	0	0	0	0	0	0	0.778151	0	0.778151	2.42813	0.477121	1.95904	2.73239	3.50474	1.14613
9169-1	9169	9169-1	0.60206	0.954243	0	0	0	0	1	3.23325	0	1.25527	1.14613	0	2.4014	1.11394	0.954243	0	1.61278	0	0	0	0	0	1.34242	0	1.9345	0	0	0.845098	0	0	0	0	0	0	0	0	0	0	0.69897	0	0.69897	2.17319	0.954243	1.95904	2.68753	3.35468	1.27875
9169-2	9169	9169-2	1.20412	0.778151	0	0	0	0	0	3.11727	0	0.954243	1.30103	0	2.32428	1.5682	0.69897	0	1.4624	0	0	0	0	0	1.4624	0	1.74819	0	0	0.477121	0	0	0	0	0.60206	0	0	0	0	0	0.60206	0.778151	0	2.20683	0.954243	1.91381	2.57054	3.38934	1.07918
9170-1	9170	9170-1	0.778151	0.90309	0	0	0	0	0	3.15381	0	1.23045	1.04139	0	2.26007	0.778151	0.69897	0	1.41497	0	0	0	0	0	1.30103	0.778151	1.91381	0	0	1.20412	0	0	0	0	0	0	0	0	0	0	0.778151	0	0.845098	2.03743	0.69897	1.95424	2.64542	3.25696	1.27875
9170-2	9170	9170-2	0.69897	0.954243	0	0	0	0	1.17609	3.01745	0	1.34242	0.90309	1	2.31175	0.477121	0.778151	0.477121	1.14613	0	0	0	0	0	1.27875	0	1.86923	0	0	1.07918	0	0	0	0	0.30103	0	0	0	0	0	0	0.30103	0.477121	2.31175	0.845098	1.92428	2.53148	3.30276	1.30103
9170-3	9170	9170-3	0	0.60206	0	0	0.60206	0	0.90309	2.63144	0.778151	1.17609	1.17609	0.60206	2.549	1.6721	0.845098	0	0.954243	0	0	0	0	0	1.07918	1.04139	1	0	0.60206	1.07918	0	0.60206	1.04139	0	0	0	0	0	0	0	0.90309	0	0	2.42488	1.14613	2.18752	2.83632	3.554	1.32222
9171-1	9171	9171-1	0	0.30103	0	0	0	0	1.04139	2.72835	0.30103	1.49136	1.23045	0.954243	2.76641	1.64345	1.04139	0	1.39794	0	0	0	0	0	1.20412	1.30103	1.44716	0	0	1.14613	0	0	0	0	0	0	0	0	0	0	1	0.69897	1	2.67578	1.20412	2.39445	2.85974	3.64078	1.47712
9171-2	9171	9171-2	1.23045	1	0	0	0	0	1.04139	3.16761	0	1.20412	1.04139	0	2.4216	0.845098	0.90309	0	1.60206	0	0	0	0	0	1.4624	0	2.05308	0	0	1.07918	0	0	0	0	0	0	0	0	0	0	0.90309	0.90309	0	2.31806	1.20412	1.92428	2.45788	3.41246	1.11394
9171-3	9171	9171-3	0.60206	0	0	0	0	0	1	3.28421	0.477121	1.5563	1.11394	0.69897	2.4456	1	0.954243	0	1.47712	0	0	0	0	0	0.954243	0	1.65321	0	0	1.11394	0	0	0	0	0	0	0.60206	0	0	0	0	0.954243	0.60206	2.24055	0	1.97313	2.50106	3.49178	1.11394
9172-2	9172	9172-2	1.25527	1	0	0	0	0	1.04139	3.14891	0	1.25527	1.07918	0	2.20683	1.20412	0	0	1.32222	0	0	0	0	0.778151	1.34242	1	1.99564	0	0	1.04139	0	0	0	0	0	0	0	0	0	0	0	0	0	2.31597	1.11394	1.88649	2.53148	3.37511	1.14613
9172-3	9172	9172-3	0	0	0	0	0	0	0.954243	2.67578	0	1.07918	0.954243	0	2.5966	1.4624	1	0	1.27875	0	0	0	0	0	0.845098	0	1.44716	0	0	0.778151	0	0	0	0	0	0	0	0	0	0	0	0	0.90309	2.42975	1.07918	2.07188	2.69548	3.61899	1.30103
9172-1	9172	9172-1	0.778151	0.60206	0	0	0	0.477121	0.60206	3.25744	0	1.51851	1.07918	0	2.36922	1.25527	0.60206	0	1.23045	0	0	0	0	0	1.41497	0	1.98677	0	0	0.778151	0	0	0	0	0	0	0	0	0	0	0.69897	0	0.954243	2.20952	0.69897	1.90309	2.64147	3.42684	0.778151
9173-1	9173	9173-1	0.954243	1.17609	0	0	0	0.60206	1.44716	3.10415	0.778151	1.53148	1.14613	0	2.38202	1.60206	0.60206	0	1.36173	0	0	0	0	0	0.845098	1.34242	2.05308	0	0	1.11394	0.30103	0	0	0	0	0	0	0	0	0	0	0.60206	0.69897	2.31175	0.845098	1.98227	2.61909	3.34242	1.11394
9173-2	9173	9173-2	0	0.954243	0	0	0	0	1.36173	2.97035	0	1.30103	0.69897	0	2.22272	1.17609	0.30103	0	1.5563	0	0	0	0	0	1.34242	1.44716	2.08636	0	0	1.36173	0	0	0	0	0	0	0	0.477121	0	0	0.69897	0	1.14613	2.25042	0	1.9345	2.4843	3.24254	1.07918
9173-3	9173	9173-3	0.69897	1.04139	0.90309	0	0	0	0	3.14051	0	1.07918	0.778151	0	2.32015	1.17609	0.69897	0	1.30103	0	0	0	0	0	1.30103	0	0	0	0	0	0.778151	0	0	0	0	0	0	0	0	0	0.69897	0	0	2.21748	0.90309	1.8451	2.53148	3.41414	1.34242
9174-1	9174	9174-1	0.778151	1.14613	0	0	0	0	1.38021	2.94201	0.477121	0.90309	0.954243	0.477121	2.35984	1.17609	0	0	1.60206	0	0	0	0	0	1.39794	1.74036	2.08636	0	0	1.27875	0	0	0	0	0	0	0	0	0	0	0	0.90309	0.845098	2.4609	1	1.94448	2.60206	3.29798	1
9174-2	9174	9174-2	1	1.11394	0	0.69897	0	0	1.25527	2.97035	0	1.43136	0.69897	0.60206	2.22789	1.36173	1.04139	0	1.5682	0	0	0	0	0	1.11394	1.17609	2.10721	0	0	1.07918	0	0	0	0	0.30103	0	0	0	0	0.954243	0	0	0	2.27646	0.778151	1.86923	2.50515	3.32428	1.11394
9174-3	9174	9174-3	0	0	0	0	0	0	0	2.79796	0	1.25527	0.778151	0	2.5302	1.53148	0.778151	0	1.34242	0	0	0	0	0	0	0	1.5563	0	0	1.34242	0	0	0	0	0	0	0	0	0	0	0	0	1.27875	2.32428	1.04139	2.01284	2.55751	3.57565	1.50515
9175-2	9175	9175-2	1.17609	1.25527	0.845098	0	0	0	1.30103	2.92169	0	1.39794	0.778151	0.845098	2.26951	1.04139	0.477121	0	1.39794	0.778151	0	0	0	0	1.17609	1.54407	1.92942	0	0	1.39794	0	0	0	0	0	0	0	0	0	0	0	0	0.778151	2.2014	0.778151	2	2.54531	3.29491	1.11394
9175-1	9175	9175-1	1.50515	1.14613	0	0.845098	0.477121	0	1.30103	2.96567	1.30103	1.44716	1.20412	0	0.845098	0	1.77085	1.64345	2.54158	0	1.23045	0	0	0	2.10037	2.43616	1.34242	0.60206	0	1.60206	1.14613	0.954243	0.90309	0.954243	0	1.04139	1.25527	1.04139	1.43136	0	1.74036	1.43136	0	2.24055	0.954243	1.50515	2.39094	3.04999	0.30103
9175-3	9175	9175-3	0	0	0	0	0	0	1.04139	2.63649	0	1.27875	0.954243	0.477121	2.58206	1.38021	0	0	1.17609	0	0	1.11394	0	0	1.30103	1.716	1.62325	0	0	1.43136	0	0	0	0	0.60206	0	0	0	0	0	0	0	0.30103	2.31806	0.954243	2.14922	2.75511	3.50092	1.34242
9176-3	9176	9176-3	0.90309	1	0	0	0	0	0.477121	3.16017	0.30103	1.23045	0.845098	0	2.33244	0.90309	0	0	1.25527	0	0	0	0	0	0.954243	0	1.89763	0	0	0	0.30103	0	0	0	0	0	0	0	0	0	0.69897	0	0	2.02119	0	1.80618	2.59106	3.3681	0.90309
9176-2	9176	9176-2	0.90309	0.845098	0	0	0	0	0.778151	2.96895	0.69897	1.17609	0.60206	0.477121	2.38382	1	0.69897	0	1.44716	0.477121	0	0	0	0	1.25527	1.11394	1.76343	0	0	1.23045	0.60206	0	0	0	0	0	0	0	0.30103	0	0	0	0.845098	2.22011	0.845098	1.93952	2.52375	3.32654	1.30103
9176-1	9176	9176-1	0.845098	0.60206	0	0	0	0	1.20412	3.24527	0	1.60206	1.25527	0	2.43297	1.11394	0.477121	0.477121	1.63347	0	0	0	0	0.90309	1.51851	0	2.06819	0	0	0.954243	0	0	0	0	0	0	0	0	0	0	0	0	0	2.26007	1	1.79934	2.716	3.4096	0.954243
9177-2	9177	9177-2	0.60206	0	0	0	0	0	0.477121	3.031	0	1.23045	0.69897	0	2.23045	1.23045	0.69897	0	1.23045	0	0	0	0	0	1.32222	0.845098	1.89763	0	0	0	0	0.477121	0	0	0	0	0.30103	0	0	0	0	0.30103	0.69897	2.22011	0.69897	1.92942	2.36361	3.32284	0.90309
9177-1	9177	9177-1	0.69897	1	0	0	0	0	0.69897	3.09377	0.477121	1.44716	1.11394	0.778151	2.30535	1.07918	0	0	1.5563	0	0	0	0	0	1.4624	0.845098	1.81954	0.30103	0	0	0	0	0	0	0.30103	0	0	0	0	0	0.845098	0.60206	0	2.26007	1	1.91908	2.63749	3.28307	0.69897
9177-3	9177	9177-3	0.69897	0.69897	0	0	0	0	0	3.13033	0.954243	1.4624	1.23045	0.69897	2.49415	1.30103	0.90309	0	1.6721	0	0	0	0	0	1.20412	0	2.01284	0	0	0	0	0	0	0	0	0	0	0	0	0	0.69897	0	0.90309	2.29003	0.954243	2.12385	2.71012	3.53656	1.34242
9179-3	9179	9179-3	0	0.30103	0	0	0.60206	0	0.60206	2.75282	0	0.954243	1.23045	0.778151	2.67394	1.39794	0.30103	0	1.07918	0	0	0	0	0	1.23045	0.845098	1.23045	0	0	1.32222	0	0	0	0	0.60206	0	0	0	0	0	1.07918	1.04139	1.41497	2.37107	1	2.09691	2.83123	3.67025	1.34242
9179-1	9179	9179-1	0	0	0	0	0	0	0	3.06558	0	1.51851	0.845098	0.60206	2.27184	1.11394	0.954243	0	1.23045	0	0	0	0	0	1.11394	0	1.92942	0	0	0	0	0	0	0	0	0	0	0	0	0	0	0	1.14613	2.14301	1.27875	1.82607	2.56937	3.38987	1.30103
9179-2	9179	9179-2	1.20412	0	0	0	0.477121	0	1.27875	3.22917	1	1.53148	1	0	2.26007	0.90309	1	0	1.59106	0	0	0	0	0	1.32222	0	1.69897	0	0	0	0	0	0	0	0	0	0	0	0	0	0.90309	1.07918	0	1.89763	0.60206	1.95424	2.59879	3.44122	1.30103
9180-1	9180	9180-1	0.69897	0.845098	0	0	0	0	0.778151	3.1427	0	1.34242	0.778151	0	2.29003	1.20412	0	0	1.39794	0	0	0	0	0	1.23045	0	2.05308	0	0	1.14613	0	0	0	0	0	0	0	0	0	0	0.778151	0	0	2.233	1.04139	2.03743	2.71517	3.39164	1.34242
9180-2	9180	9180-2	1	1.11394	0	0	0	0	0	3.05038	0.60206	1.14613	1.07918	0	2.2014	1.17609	0.30103	0	1.5563	0	0	0	0	0	1.23045	1	2.05308	0	0	0.60206	0	0	0	0	0	0	0	0	0	0	0	0	0	2.2014	0.477121	1.83251	2.3962	3.34203	1.17609
9180-3	9180	9180-3	0	0	0	0	0	0	1.20412	2.54654	1	1.23045	1.30103	1.23045	2.62428	1.6902	1.07918	0	1.34242	0	0	0	0	0	1.07918	0.60206	1.54407	0	0	1.30103	0	0	0	0	0	0	0	0	0	0	0.30103	0	0	2.46687	0.954243	2.17898	2.7364	3.52336	1.34242
9181-1	9181	9181-1	0.30103	1	0	0	0	0	1.50515	3.01745	0.90309	1.47712	1.23045	0.845098	2.49554	1.39794	0	0.477121	1.39794	0	0	0	0	0	0.90309	1.70757	2.20952	0	0	1.54407	0	0	0.60206	0	1.07918	0	0	0	0	0	0	0	0.60206	2.4624	1.07918	2.01703	2.60746	3.39146	1.34242
9181-2	9181	9181-2	0.954243	1.25527	0	0	0	0	1.30103	3.01452	0.30103	1.32222	1.14613	0.954243	2.52634	1.36173	0.60206	0	1.5682	0	0	0	0	0	1.43136	1.44716	2.15229	0	0	1.04139	0	0	0	0	0.60206	0	0	0	0	0	0	0.60206	1	2.49554	1.11394	2.23045	2.65706	3.43854	1.32222
9181-3	9181	9181-3	1.04139	1.11394	0	0	0	0	1.34242	3.041	0.778151	1.04139	1.17609	0.60206	2.33041	1.32222	0.69897	0	1.63347	0	0	0	0	0	1.23045	1.11394	2.05308	0	0	1.20412	0	0	0	0	0	0	0	0	0	0	0.30103	0	0.778151	2.22789	0.60206	1.94939	2.57519	3.32858	1.11394
9182-2	9182	9182-2	0.845098	0.477121	0	0	0	0	0.954243	3.14082	0	1.20412	0.778151	0.69897	2.36173	1.11394	0.845098	0	1.49136	0	0	0	0	0	1.20412	0	1.92942	0	0	0.954243	0	0	0	0	0	0	0	0	0	0	0.477121	0	0.60206	2.1959	1	1.9345	2.59439	3.3831	1.23045
9182-3	9182	9182-3	0	0.477121	0	0	0	0	0.69897	2.9345	0	1.30103	1.04139	0	2.67943	1.88081	0	0	1.49136	0	0	0	0	0.69897	0.954243	1.32222	1.38021	0	0	0.69897	0	0	0	0	0	0	0	0	0	0	0.90309	0	1	2.38202	1.17609	2.13988	2.71096	3.65581	1.41497
9182-1	9182	9182-1	0.60206	0.845098	0	0	0	0	0	3.20925	0.954243	1.30103	1	0.90309	2.33041	0	0.69897	0	1.27875	0	0	0	0	0	1.34242	1.04139	1.92942	0	0	0	0	0	0	0	0	0	0	0	0	0	0	0	0.60206	2.12385	0.90309	1.59106	2.6149	3.33885	1
9183-1	9183	9183-1	1	0.845098	0	0	0	0.60206	1.38021	2.98227	0	1.32222	0.954243	0	2.3784	1.11394	0.90309	0	1.4624	0	0	0	0	0	1.36173	1.72428	1.66276	0	0	1.44716	0	0	0	0	0.69897	0	0	0	0	0	0.778151	0	0	2.17026	1.07918	2.0086	2.72673	3.32736	0.845098
9183-2	9183	9183-2	0	0.477121	0	0.60206	0.778151	0	1.27875	2.79727	1.14613	1.20412	1.32222	0.845098	2.65418	1.47712	0	0	1.20412	0	0	0	0	0.845098	1.5563	1.76343	1.85733	0	0	1.4624	0	1	0	0.90309	0.90309	0	0	0	0	0	0	0.60206	1.11394	2.46389	1.36173	2.3962	2.99564	3.63478	1.5563
9183-3	9183	9183-3	0.778151	0	0	0	0	0	1.11394	2.75435	0	1.17609	1.4624	0	2.55991	1.5682	0	0	1.20412	0	0	0	0	0	1.43136	1.54407	1.44716	0	0	1.07918	0	0	0	0	0	0	0	0	0	0	0	0	1.11394	2.53782	1.30103	2.21484	2.89098	3.57669	1.32222
9184-1	9184	9184-1	1.17609	0	0	0	0	0	0.845098	3.22011	1.04139	1.44716	1.07918	0	2.22531	1	0.477121	0	1.38021	0	0	0	0	0	1.32222	0	1.82607	0	0	0	0	0	0	0	0	0	0	0	0	0	0.778151	0	0.69897	2.22272	0.845098	1.86923	2.70415	3.40943	0.954243
9184-2	9184	9184-2	1.04139	0	0	0	0	0	0.778151	3.10721	0	1.49136	0.954243	0	2.17609	0.60206	0.69897	0	1.50515	0	0	0	0	0	1.27875	0	1.73239	0	0	0	0	0	0	0	0	0	0	0	0	0	0.60206	1	0.845098	2.2878	0	1.89209	2.63649	3.39829	1.44716
9184-3	9184	9184-3	0	0	0	0	0	0	1.07918	2.79239	0.60206	1.23045	1.44716	0	2.62941	0.954243	0.60206	0.477121	1.07918	0	0	0	0	0	1.27875	1.14613	1.72428	0	0	1.4624	0	0.60206	0	0	0	0	0	0	0	0	1.04139	0	0.69897	2.55023	1.27875	2.16137	2.84386	3.59594	1.30103
9185-2	9185	9185-2	1	1.25527	0	0	0.60206	0	1.5563	3.0249	1.11394	1.57978	1.27875	0.30103	1.89209	0.845098	1.5682	1.17609	2.08636	0	0	0	1.38021	0	1.57978	2.21219	2.04139	0	0	1.89209	0	1.20412	0	1.93952	0	0.69897	0	0.30103	0	0	0.30103	1.23045	0	2.15836	1.30103	1.85126	2.68574	3.22246	1.04139
9185-1	9185	9185-1	0	0	0	0	0	0	0.845098	2.90255	0	1.43136	1.07918	0.477121	2.50515	1.04139	0.845098	0	1.32222	0	0	0	0	0	1.41497	1.53148	1.5682	0	0	1.23045	0.778151	0	0	0	0	0	0	0	0	0	0.477121	1.04139	0.477121	2.56348	1.11394	2.05308	2.8293	3.49665	1.41497
9185-3	9185	9185-3	1.11394	0	0	0	0	0	0.60206	3.05192	0.30103	1.11394	1.20412	0	2.36173	1.17609	0.477121	0	1.04139	0	0	0	0	0	0.845098	1.34242	1.87506	0	0	1.04139	0	0	0	0	0	0	0	0	0	0	0	0	0	2.17319	0.845098	1.90309	2.62737	3.35334	0.778151
9188-3	9188	9188-3	0.477121	0.60206	0.69897	0	0	0	1.25527	2.94694	0.845098	1.17609	1	0.845098	2.4609	1.41497	0.477121	0	1.23045	0	0	0	0	0	1.20412	1.38021	1.98677	0	0	1.4624	0	0	0	0	0	0	0	0	0	0	0	0	0.778151	2.38561	0.60206	2.01703	2.61172	3.40261	1.07918
9188-1	9188	9188-1	0	0.845098	0	0	0	0.477121	0.954243	3.01072	0.477121	1.32222	0.845098	0	2.33846	1.04139	0.30103	0	1.54407	0	0	0	0	0	1.27875	0	1.78533	0	0	0.90309	0	0	0	0	0	0	0	0	0	0	0.30103	0	0.778151	2.26482	0.778151	1.95904	2.6721	3.35122	1.07918
9188-2	9188	9188-2	1.32222	0.954243	0.954243	0	0	0	0	3.11826	0.477121	1.11394	1.20412	0.69897	2.24797	1.07918	0.954243	0	1.41497	0	0	0	0	0	1.23045	0	2.06819	0	0	0.845098	0	0	0	0	0	0	0	0	0	0	0	0.69897	1	2.34242	1.17609	1.87506	2.59879	3.41714	1.25527
9190-1	9190	9190-1	0.845098	0.30103	0	0	0.30103	0	0.30103	3.15137	0	1.4624	0	0	2.31175	1.32222	0.477121	0	1.34242	0	0	0	0	0	1	0	1.75587	0	0	0.778151	0	0	0	0	0	0	0	0	0.477121	0	0	0.778151	0	2.16435	1.07918	1.96848	2.71265	3.35238	1.23045
9190-2	9190	9190-2	1	0	0	0	0	0	0.778151	3.18837	0	1.07918	1.04139	0	2.2878	1.07918	0	0	0.954243	0	0	0	0	0	1.04139	0	1.89763	0	0	0	0	0	0	0	0	0	0	0	0	0	0	0	0	2.25768	0.60206	1.79934	2.58206	3.3822	1.07918
9190-3	9190	9190-3	1.14613	0.60206	0	0	0	0	0	3.1532	0	0.778151	0.90309	0	2.30963	1.11394	0.60206	0	1.73239	0	0	0	0	0	1.17609	0	1.64345	0	0	1	0	0	0	0	0	0	0	0	0	0	0.90309	0	0	2.03342	0.69897	1.77085	2.53656	3.36211	1
9191-2	9191	9191-2	1.25527	1.36173	0	1.14613	0	0	1.47712	2.94349	1.43136	1.41497	1.04139	1.20412	1.68124	0	1.49136	0	2.10037	0	0	0	1.44716	0	1.74036	2.19866	1.86923	0	0.778151	1.95904	0	1.07918	0	1.77815	0.845098	0.954243	1.11394	0.477121	0	0	0	1.11394	0	2.13033	1.17609	1.91908	2.35411	3.1245	0.69897
9191-1	9191	9191-1	0.477121	0.845098	0	0	0	0.477121	0	3.2079	0.60206	1.14613	1.04139	0.60206	2.38202	1.44716	0	0	1.25527	0	0	0	0	0	1.43136	0	1.83251	0	0	0	0	0.60206	0	0	0	0	0	0	0	0	0	0.69897	1.04139	2.19312	1.07918	2.07188	2.66558	3.43441	1.17609
9191-3	9191	9191-3	0	0	0	0	0	0	0	2.45332	0	1.14613	1	0.69897	2.4456	1.53148	0.60206	0	0.69897	0	0	0	0	0	0.778151	1.11394	1.07918	0	0	1.11394	0	0	0	0	0	0	0	0	0	0	0.954243	0.90309	1.04139	2.37475	0.69897	2.06819	2.68034	3.54494	1.50515
9194-3	9194	9194-3	0.30103	0.477121	0	0	0	0	0.778151	2.716	0	1.04139	1	0	2.56229	1.51851	0.778151	0	1.14613	0	0	0	0	0	1.36173	1.07918	1.5682	0.90309	0	1	0	0	0.778151	0	0	0	0	0	0	0	1	0	1.04139	2.45025	1.07918	2.12057	2.83885	3.62737	1.38021
9194-1	9194	9194-1	1.25527	1.30103	0	0	0	0	1.20412	3.11059	0	1.32222	0.30103	0.477121	2.48714	1.38021	0	0	1.27875	0	0	0	0	0	1.30103	1.14613	2.02531	0	0	0	0	0	0	0	0	0	0	0	0	0	0	0	0.69897	2.3784	0.954243	1.96848	2.63749	3.36642	1.20412
9194-2	9194	9194-2	0.778151	1	0.778151	0	0	0	1.34242	2.93752	0	1.30103	1	0.477121	2.31806	1	1.04139	0	1.5563	0	0	0	0	0	1.5682	1.78533	1.96848	0	0	1.39794	0	0	0	0	0	0	0	0	0	0	0.477121	0	0.60206	2.43136	1.07918	2.02119	2.57171	3.3438	1.11394
9198-1	9198	9198-1	0	0.477121	0	0	0	0	1.34242	2.76938	0.778151	1.07918	1.23045	1.17609	2.81291	1.716	1.14613	0.778151	1.34242	0	0	0	0	0	1.39794	2.17609	0	0	0	1.62325	0	1	0	0	0.90309	0	0	0	0	0	0.778151	0.60206	1.04139	2.78032	1.14613	2.50106	2.98498	3.65504	1.43136
9198-2	9198	9198-2	1	0.30103	0	0.60206	0.60206	0	1.23045	3.14922	0	1.30103	1.32222	0.778151	2.43933	1.11394	0	0	1.41497	0	0	0	0.60206	0	1.11394	0	0	0	0	0	0	0	0	0	0	0	0	0	0	0	0	0.69897	1.04139	2.32015	0.90309	1.91908	2.72916	3.44669	1.39794
9198-3	9198	9198-3	0	0.69897	0	0	0	0	0	2.74507	0.69897	0.954243	1.43136	1	2.74507	1.41497	1.04139	0	1.27875	0	0	0	0	0	1.50515	1.6902	1.69897	0	0	1.59106	0	0	0	0	0	0	0	0	0	0	0.845098	0.90309	1.07918	2.6981	1.23045	2.31597	2.92428	3.64246	1.62325
9199-1	9199	9199-1	0	0	0	0	0	0	0.60206	3.25212	0	1.41497	1.23045	0.60206	2.29003	1.07918	0.69897	0	1.30103	0	0	0	0	0	1.27875	0	0	0	0	0	0	0	0	0	0	0	0	0	0	0	0.69897	0	0.845098	2.16435	0.30103	1.69897	2.59988	3.38721	1.17609
9199-2	9199	9199-2	0.477121	0.60206	0	0	0.778151	0	0.30103	2.93902	0.60206	1.43136	0.69897	0	2.3032	1.14613	0	0	1.36173	0	0	0	0	0	1.14613	1.07918	1.74036	0	0	0	0	0	0	0	0	0	0	0	0	0	0	0	0.845098	2.29447	0	1.99123	2.64345	3.42308	1.34242
9199-3	9199	9199-3	1.17609	1.11394	0	0	0	0	1.66276	3.00432	0.90309	1.36173	0.69897	0.30103	1.716	0	1.23045	0.778151	1.83885	0	0	0	1.27875	0	1.5563	2.45939	1.82607	0	0	1.90309	0	0.778151	0	1.76343	0	0	0	1.04139	0	0	0.477121	1.11394	0	1.99564	0.845098	1.57978	2.33646	3.02572	0.778151
9200-1	9200	9200-1	0.778151	0.845098	0	0.778151	0	0	1.34242	2.8893	0.60206	1.32222	1	0	0	0	1.25527	1.11394	2.10721	0	0.778151	0	0	0	1.68124	1.41497	1.94448	0	0	1.61278	0	0	0	1.07918	0	0	0.954243	0.69897	0	0	0.778151	1.17609	0	1.9345	0.954243	1.70757	2.35603	2.97359	0
9200-2	9200	9200-2	1.17609	1.23045	0	0.90309	0	0	1.53148	2.86451	1.11394	1.6902	1.25527	0.60206	1.69897	0	1.41497	0	1.96379	0	0.477121	0	0.90309	0.90309	1.51851	1.90849	1.93952	0	0	1.97772	0.30103	0	0	2.11394	0	0.90309	0	0.954243	0	0	0.90309	1	1.17609	2.22011	1.23045	2.07188	2.40312	3.0983	0.845098
9200-3	9200	9200-3	1.07918	1	0	0	0	0	1.41497	3.00775	0.778151	1.23045	0.954243	0	2.31806	0.90309	0.845098	0	1.6902	0	0	0	0	0	1.23045	1.57978	1.77085	0	0	1.27875	0	0	0	0	0	0	0	0	0	0	0	0	0	2.22011	0.778151	1.95904	2.5977	3.31345	1.17609
9201-1	9201	9201-1	0.60206	0	0	0	0	0	1.20412	3.08314	0	1	0	0	2.3075	1	0.30103	0	1.32222	0	0	0	0	0	1.07918	0	1.39794	0	0	1.11394	0	0	0	0	0	0	0	0	0	0	0.60206	0	0.90309	2.26482	0.30103	1.91381	2.74819	3.43616	1.14613
9201-2	9201	9201-2	0.69897	0.477121	0	0	0	0	0.60206	3.08814	0	1.23045	1.07918	0	2.12057	0.845098	0.477121	0	1.39794	0	0	0	0	0	1.39794	0	0	0	0	0.69897	0	0	0	0	0	0	0	0	0	0	0	0	0	2.16435	0.60206	1.8451	2.52634	3.34242	1.11394
9201-3	9201	9201-3	0	0	0	0	0	0	1.04139	2.8169	0	0.60206	1.27875	0.954243	2.86688	2.07188	0.778151	0	1.36173	0	0	0	0	0	1.38021	0	1.76343	0.30103	0	1.07918	0	0	0	0	0	0	0	0	0	0	1.14613	0	1.11394	2.48001	1.04139	2.29885	2.50515	3.71374	1.64345
9202-1	9202	9202-1	0.69897	1.4624	0	0	0	0	1.65321	3.03663	0	1.32222	0.954243	0	2.34439	1.38021	0.954243	0	1.34242	0.30103	0	0	0	0	1.25527	1.85733	2.14301	0	0	1.75587	0	0	0	0	1.11394	0	0	0	0	0	0	0	0	2.29226	1	2.01703	2.66839	3.31785	1
9202-2	9202	9202-2	1.04139	1.11394	0.778151	0	0	0	1.51851	3.04493	0	1.11394	1.17609	0	2.29885	1.20412	0.845098	0	1.66276	0	0	0	0	0	1.30103	1.59106	2.10721	0	0	1.34242	0	0	0	0.60206	0	0	0	0	0.778151	0	0	1	0	2.27416	0	1.90849	2.52763	3.37639	0.845098
9202-3	9202	9202-3	1.20412	1.25527	0	0	0	0.30103	1.32222	2.99695	0	1.14613	0.69897	0	2.233	1.20412	0.60206	0	1.5682	0	0	0	0	0	1.20412	0	1.89763	0	0	0	0	0	0	0	0	0	0	0.69897	0	0	0	0	0.60206	2.11727	0.90309	1.74036	2.57519	3.29754	1.20412
9203-1	9203	9203-1	0.60206	0.954243	0	0	0	0	1.07918	2.98091	0.30103	1.32222	0.845098	0	2.26717	1.27875	0.477121	0	1.27875	0	0	0	0	0	1.53148	0	1.94448	0	0	0.954243	0	0	0	0	0	0	0	0	0	0	0	0	0.90309	2.24797	1.25527	1.98677	2.68395	3.33626	1
9203-2	9203	9203-2	0.90309	0.477121	0	0.69897	0	0	0	3.09447	0.778151	1.32222	0.954243	0	2.32015	1.43136	0.69897	0	1.47712	0	0	0	0	0	1	0	1.90849	0	0	1.32222	0	0	0	0	0	0	0	0	0	0	0	0	1.04139	2.24797	0.845098	1.8451	2.58092	3.39846	1.30103
9203-3	9203	9203-3	0	0.30103	0	0	0	0	0	2.81757	0.477121	1.07918	1.14613	0	2.72263	1.9345	0.845098	0	1.4624	0	0	0	0	0	0	1.11394	1.5563	0	0	0.778151	0	0	0	0	0	0	0	0	0	0	0	0.60206	1	2.55023	1.20412	2.24055	2.88309	3.6219	1.57978
9204-1	9204	9204-1	1.14613	0.30103	0	0	0	0	1.07918	3.09899	0.30103	1.41497	0.69897	0.60206	2.35411	1.25527	1.11394	0.845098	1.11394	0	0	0	0	0	0.30103	0	1.79239	0	0	0.477121	0	0	0	0	0	0	0	0	0	0	0	0	0	2.35793	1.04139	1.95904	2.68395	3.40909	1.17609
9204-2	9204	9204-2	0.69897	0.778151	0	0	0	0	1.17609	2.92737	0.477121	1.44716	1.11394	0	2.45484	1.11394	0.69897	0	1.43136	0	0	0	0	0	1.14613	1.04139	2.06446	0	0	0.60206	0	0.845098	0	0	0	0	0	0	0	0	0.69897	0.60206	0	2.40993	1.14613	2.08636	2.63246	3.38166	1.43136
9204-3	9204	9204-3	0.778151	1.04139	0	0	0	0	0	3.00561	0	1.38021	0	0	2.1959	1.25527	0.778151	0	1.38021	0	0	0	0	0	1.20412	0	1.81954	0	0	0.778151	0	0	0	0	0	0	0	0	0	0	0	0	0	2.09691	0.778151	1.43136	2.52244	3.31785	1.07918
9205-1	9205	9205-1	1	0.90309	0	0	0	0	1.23045	3.15776	0.845098	1.32222	0.954243	0	2.45484	1.17609	0	0	1.34242	0	0	0	0	0	1.11394	1.11394	2.07188	0	0	0	0	0	0	0	0	0	0	0	0	0	0	0	1.27875	2.27875	1.07918	1.90309	2.71433	3.45758	1.20412
9205-2	9205	9205-2	0.69897	0.845098	0	0	0	0	0.60206	2.99564	0	0.90309	0.954243	0.69897	2.10037	1.07918	0	0	1.57978	0	0	0	0	0	1.27875	0	1.79239	0	0	0.69897	0	0	0	0	0	0	0	0	0	0	0	0.90309	0.90309	2.25042	0.845098	1.89209	2.55509	3.33486	1.25527
9205-3	9205	9205-3	0	1.32222	0	0	0	0	1.32222	2.91855	0.30103	1.11394	0.69897	0	2.24304	0.954243	0.477121	0	1.5563	0	0	0	0	0	1.4624	0	1.85733	0	0	0.90309	0	0	0	0	0	0	0	0	0.30103	0	0.60206	0	0.60206	2.21219	1.07918	1.86923	2.47712	3.31952	0.954243
9206-1	9206	9206-1	0.477121	0.30103	0	0	0	0	0.845098	3.08386	0	1.34242	0.60206	0.30103	2.20952	0.69897	1	0	1.54407	0	0	0	0	0	1.34242	0	1.70757	0	0	0	0	0.69897	0	0	0	0	0.477121	0	0	0	0	0	0.845098	2.14301	0.60206	1.90849	2.5966	3.30298	1.07918
9206-2	9206	9206-2	1.20412	1.04139	0	0.30103	0	0	1.17609	3.18213	0.69897	1.27875	0.954243	0.477121	2.38917	1.36173	1	0	1.49136	0	0	0	0	0	1.32222	0	1.89763	0	0	1.11394	0	0	0	0	0	0	0	0	0	0	0	0	0	2.31387	1.17609	1.79239	2.43933	3.3948	1.25527
9206-3	9206	9206-3	0	0	0	0	0	0	0	2.79169	0.69897	1.11394	1.11394	0	2.58433	1.23045	0.845098	0	1.17609	0	0	0	0	0	1.11394	0.954243	1.5682	0	0	1	0	0	0	0	0	0	0	0	0	0	0.778151	1.23045	1	2.36361	1.27875	2.15836	2.60531	3.56761	1.61278
9207-1	9207	9207-1	1.07918	0.778151	0	0	0	0	1	3.21827	0.477121	1.23045	1.04139	0	2.37658	1.04139	0	0	1.50515	0	0	0	0	0	0.954243	0	2.04532	0	0	0	0	0.845098	0	0	0	0	0	0	0	0	0	0	0.778151	2.0569	0.477121	1.93952	2.76938	3.37107	1.34242
9207-2	9207	9207-2	0.954243	1.23045	0	0	0.477121	0	0	3.16077	0	1.07918	1.25527	0	2.10721	1.36173	0.778151	0	1.39794	0	0	0	0	0.845098	1	0.954243	1.90309	0	0	0.845098	0	0	0	0	0	0	0	0	0	0	0	0	0	2.23805	0.69897	1.83885	2.57634	3.38489	0.845098
9207-3	9207	9207-3	0.30103	0	0	0	0	0	0	3.17667	0	1.17609	0.778151	0.477121	2.16137	1.17609	0	0	1.04139	0	0	0	0	0.69897	1.30103	0.90309	1.69897	0	0	0	0	0	0	0	0	0	0	0	0	0	0	0	0	2.08279	0.778151	1.86923	2.66745	3.53415	1.34242
9208-1	9208	9208-1	0	0.477121	0	0	0	0	0	2.7796	0	1.11394	1.25527	0.60206	2.60853	1.49136	0.954243	0	1.36173	0	0	0	0	0.778151	1.11394	1.34242	1.63347	0	0	1.07918	0	0	0	0.477121	0	0	0	0	0	0	1.34242	0.60206	1.61278	2.56467	1.14613	2.23805	2.78817	3.64296	1.54407
9208-2	9208	9208-2	1.07918	0	0	0	0	0	0	3.14613	0	1.11394	1.32222	0	2.13354	1.27875	0	0	1.50515	0	0	0	0	0	1.20412	1.17609	1.85733	0	0	0	0	0	0	0	0	0	0	0	0	0	0	0	0	2.06446	0	1.76343	2.73799	3.34518	0.954243
9208-3	9208	9208-3	0.845098	0	0	0	0	0	0	3.21325	0	1.4624	1.23045	0.69897	2.48144	1.39794	0	0	1.5682	0	0	0	0	0	1.4624	1.44716	2.03342	0	0	0.954243	0	0	0	0	0	0	0	0	0	0	0.60206	0	0	2.13988	1	1.90849	2.49276	3.49108	1.30103
9209-1	9209	9209-1	0	0.60206	0	0	0	0	1.04139	2.72428	1.20412	1.11394	1.20412	0	2.81954	1.74819	0.845098	0	1.49136	0	0	0	0.30103	0	1.07918	1.78533	1.62325	0	0	1.4624	0	0.845098	0	0	0.954243	0	0	0	0	0	1.11394	0	1.27875	2.6902	1.43136	2.35025	2.95279	3.58206	1.78533
9209-2	9209	9209-2	0	0	0	0	0	0	0	2.51455	0.954243	1.20412	1.14613	0.845098	2.58659	1.47712	0.778151	0	1.32222	0	0	0	0	0	1.23045	1.54407	1.11394	0	0	1.5563	0	0.90309	0	0.30103	0	0	0	0	0	0	0.477121	0.90309	0	2.60206	1.07918	2.24304	2.80618	3.50813	1.44716
9209-3	9209	9209-3	0	0.477121	0	0	0	0	1.30103	2.90146	0.69897	1.34242	1.14613	1.04139	2.71684	1.49136	1.11394	1.04139	0.90309	0	0	0	0.845098	0	1.39794	1.4624	1.49136	0	0	1.41497	0	1.14613	0	0	0	0	0	0	0	0	0	0.90309	0.845098	2.53403	1.27875	2.32222	2.81023	3.56455	1.50515
9210-1	9210	9210-1	0.845098	0.69897	0	0	0	0	0	3.19535	0	1.25527	1.25527	0	2.21484	0.845098	0.477121	0	1.34242	0	0	0	0	0	1.14613	0.845098	1.73239	0	0	0	0.477121	0	0	0	0	0	0	0	0	0	0.954243	0.845098	0.845098	2.09342	0.90309	1.60206	2.49831	3.30406	1.25527
9210-2	9210	9210-2	0.845098	0.90309	0	0	0	0	0	3.21932	0	1.32222	0.90309	0	2.3075	1.17609	0.477121	0	1.57978	0	0	0	0	0	1.23045	0	1.87506	0	0	1	0	0	0	0	0	0	0	0	0	0	0.90309	0.60206	0.845098	2.11394	1.04139	1.76343	2.79449	3.44607	1.27875
9210-3	9210	9210-3	0.954243	1	0	0	0	0.30103	1.25527	3.36154	0	1.53148	1.07918	0	2.549	1.60206	0.778151	0	1.54407	0	0	0	0	0	1.04139	0	2.0607	0	0	0.845098	0	0	0	0	0	0	0	0	0	0	0.954243	0	0.90309	2.31806	0.845098	1.95424	2.53403	3.5311	1.25527
9211-1	9211	9211-1	0	0	0	0	0	0	0.845098	2.71181	0.60206	1.41497	1.07918	1.07918	2.58546	1.54407	0	0.90309	1.07918	0	0	0	0	0	1.30103	0.845098	1.23045	0	0	1	0	0	0	0	0	0	0	0	0	0	0.778151	0	0	2.24055	1.11394	2.17609	2.59879	3.57461	1.36173
9211-2	9211	9211-2	0.69897	0	0	0	0	0	1.07918	3.12287	0.845098	1.4624	0.954243	1.04139	2.31175	1.20412	0.90309	0	1.47712	0	0	0.477121	0	0	1.50515	1.17609	1.77085	0	0	1.14613	0	0	0	0	0	0	0	0	0	0.60206	0.477121	0.954243	0	2.1271	0.778151	1.90849	2.73078	3.41397	1.38021
9211-3	9211	9211-3	0.845098	0.954243	0	0.69897	0	0	1	2.98588	0	1.41497	0.954243	0	2.3784	1.30103	0	0	1.49136	0	0	0	0	0	1.30103	0	1.77085	0	0	0.477121	0	0	0	0	0	0	0	0	0	0	0.60206	1.04139	0	2.11727	0	2.0607	2.49136	3.45667	1.27875
9212-1	9212	9212-1	0	0.30103	0	0	0	0	1.04139	2.67761	0.60206	1.27875	0.90309	0	2.37658	1.47712	0.778151	0	1.32222	0	0	0	0	0	1.27875	1.11394	0	0	0	0.90309	0	0	0	0	0	0	0	0	0	0	0.477121	0.778151	0.778151	2.23553	1	1.87506	2.87679	3.49192	1
9212-2	9212	9212-2	1.14613	1	0	0	0	0	1.07918	3.13033	0	1.04139	1.14613	0.778151	2.29885	1.4624	0.60206	0	1.53148	0	0	0	0	0	1.27875	1.27875	1.60206	0	0	0.90309	0	0	0	0	0	0	0	0	0	0	0.845098	0	0	2.05308	0.30103	1.74819	2.61278	3.40226	1.11394
9212-3	9212	9212-3	1.14613	1.04139	0.90309	0	0	0	1.11394	3.055	0	1.41497	1.04139	0.477121	2.37475	1.11394	0	0	1.54407	0	0	0	0	0	1.20412	1.23045	1.68124	0	0	1.20412	0	0	0	0	0	0	0	0	0	0	0.845098	0.69897	0.845098	2.11394	1.07918	1.80618	2.67117	3.39463	0.954243
9214-1	9214	9214-1	0.69897	0.60206	0	1	0	0	1.34242	2.99826	0	1.25527	1.11394	0	2.32838	1.14613	0	0.845098	1.4624	0	0	0	0	0	1.14613	1.62325	1.87506	0	0	1.36173	0	0	0	0	0.845098	0	0	0	0	0	0	0	0.954243	2.33041	1.17609	2.00432	2.58659	3.33041	1.04139
9214-2	9214	9214-2	1.17609	0.954243	0	0	0.778151	0	0.69897	2.95999	0	1.30103	0.60206	0.60206	2.23805	1.20412	0	0	1.51851	0	0	0	0	0	1.39794	0	2.08991	0	0	1.17609	0	0	0	0	0	0	0	0.30103	0	0	0.477121	1.07918	0	2.18469	1.04139	1.82607	2.54654	3.30535	1.11394
9214-3	9214	9214-3	0	0.30103	0	0	0	0	0.69897	2.74741	0.90309	1.23045	1.07918	0.845098	2.5563	1.36173	0.845098	0	1.32222	0	0	0	0	0	1.14613	0.845098	1.38021	0	0	1.32222	0.30103	0.90309	0	0.778151	0	0	0	0	0	0	0.69897	1.11394	1.04139	2.40654	0.954243	2.10721	2.88252	3.56015	1.50515
9215-1	9215	9215-1	1.04139	1	0	0	0	0.477121	1.04139	2.989	0.477121	1.41497	0.845098	0.30103	2.37475	1.43136	1	0	1.44716	0	0	0	0	0	1.38021	1.17609	2.0569	0	0	1.34242	0	0	0	0	0	0	0	0	0	0	0	0.60206	0.60206	2.42488	0.845098	1.88649	2.6464	3.31006	1
9215-2	9215	9215-2	1	0.69897	0	0	0	0	1.41497	3.03503	0.778151	1.39794	0.90309	0.778151	2.50243	1.32222	1.07918	0.60206	1.41497	0	0	0	0	0	0.954243	1.14613	2.00432	0	0	1.07918	0.60206	0	0	0	0	0	0	0	0	1	0	0.845098	0	2.3784	1.25527	2.11727	2.52634	3.44185	1.17609
9215-3	9215	9215-3	0	0.90309	0	0	0	0	0.778151	2.67394	0	1.36173	1.23045	0.90309	2.64836	1.5563	1.07918	0	1.20412	0	0	0	0	0	1.11394	0	1.77815	0	0	0	0	0.778151	0.477121	0	0	0	0	0	0	0	0.477121	0	0.477121	2.45484	1.04139	2.22789	2.67117	3.59901	1.53148
9216-1	9216	9216-1	0	1.04139	0	0.778151	0	0	1.44716	2.83123	0.60206	1.23045	1.14613	0	1.5682	0.30103	1.11394	1	1.9345	0.954243	0.90309	0	0	0	1.51851	1.85733	0	0	0	1.5563	0	0	0	1.76343	0.845098	0	0.477121	0	0.60206	0	0	0.69897	0.90309	2.05308	1.07918	1.8451	2.36173	3.06781	0
9216-2	9216	9216-2	1.07918	1.17609	0	0	0.60206	0.477121	1.54407	3.02776	0	1.32222	1.07918	0.69897	2.45332	0.954243	0.845098	0	1.63347	0	0	0	0	0	1.62325	1.30103	1.85733	0	0	1.27875	0	0	0	0	0	0	0	0	0	0	0	0	0	2.16137	0	1.9345	2.68664	3.41764	1.04139
9216-3	9216	9216-3	0	0	0	0	0	0	1.11394	2.74351	1	1.25527	1.20412	0	2.54777	1.63347	0.60206	0	1.27875	0	0	0	0.845098	0	1	1.25527	1.25527	0	0	1.20412	0	0	0	0	0	0	0	0	0	0	1.07918	0	0.954243	2.33244	0.60206	2.1271	2.88536	3.56301	1.38021
9218-1	9218	9218-1	1.07918	0	0	0	0	0	1.17609	3.08849	0.60206	1.39794	1.07918	0.477121	2.40993	1.04139	1.04139	0	1.51851	0	0	0	0	0	1.47712	0	1.9345	0	0	0.845098	0.845098	0	0	0	0	0	0	0	0	0	0	0	0	2.24551	1.11394	2.04532	2.77452	3.43838	1.39794
9218-2	9218	9218-2	0.954243	1	0	0	0	0	1.04139	3.03822	0.60206	1.4624	0	0.778151	2.3032	0.90309	0	0.778151	1.57978	0	0	0	0	0	1.4624	0.90309	2.02531	0	0	0.60206	0	0	0	0	0	0	0	0	0	0	0	0.778151	0	2.18469	0.90309	1.94448	2.65031	3.37712	0.954243
9218-3	9218	9218-3	0	0	0	0	0	0	1	2.66745	0.60206	1.17609	1.20412	0.845098	2.58995	1.32222	1.07918	0	1.07918	0	0	0.845098	0.90309	0	1.11394	1.38021	1.38021	0	0	1.20412	0	0	0	0	0.30103	0	0	0	0	0	0.60206	1.11394	0.845098	2.46687	1.11394	2.28103	2.78104	3.51455	1.25527
9221-1	9221	9221-1	0.60206	0.778151	0	0	0	0	1.36173	3.01703	0	1.38021	1.23045	0	2.35218	1.23045	0.477121	0	1.23045	0	0	0	0	0	0.954243	1.07918	0	0	0	1.07918	0	0	0	0.69897	0	0	0	0	0	0	1.04139	0	0.954243	2.38917	1.17609	1.99123	2.6981	3.40432	1.07918
9221-2	9221	9221-2	0.90309	0.60206	0	0	0	0.477121	1.04139	2.94743	0.60206	1.17609	1	0.60206	2.42975	0.90309	1.07918	0	1.59106	0	0	0	0	0	1.47712	1.23045	2.03743	0	0	1.34242	0	0	0	0	0	0	0	0	0	0	0	0.90309	0	2.57287	0	2.02938	2.63144	3.42259	1.27875
9221-3	9221	9221-3	0.778151	1.04139	0	0	0	0	1.44716	2.88986	0	1.14613	1.32222	0	2.25527	0.954243	0	0	1.5563	0	0	0	0	0	1.23045	1.07918	1.91381	0	0	1	0	0	0	0	0	0	0	0	0	0	0	0	0	2.42651	0	1.85733	2.56467	3.33706	1.23045
9222-1	9222	9222-1	0.69897	1	0	0	0	0	1.04139	3.31681	0	1.59106	1.07918	0	2.36361	0.845098	0.778151	0	1.53148	0	0	0	0	0	1.4624	0	1.91381	0	0	1.04139	0	0.954243	0	0	0	0	0	0	0	0	0.90309	0	1.04139	2.233	0.778151	1.92942	2.5611	3.4606	1.14613
9222-2	9222	9222-2	1.11394	0.477121	0	0	0	0	1.04139	3.24155	0	1.36173	1	0	2.38561	1.14613	1.23045	0	1.5563	0	0	0	0	0	1.36173	0	1.83885	0	0	0.30103	0	0	0	0	0	0	0	0	0	0.30103	1.17609	0.60206	0	2.30103	0.778151	1.96848	2.59439	3.4894	1.17609
9222-3	9222	9222-3	0	0.69897	0	0	0	0	0	2.80754	0.60206	1.17609	1.14613	0.30103	2.59329	1.4624	0	0	1.39794	0	0	0	0	0	1.25527	0.69897	1.41497	0	0	0.60206	0.90309	0	0	0	0	0	0	0	0	0	0.90309	0.954243	0.477121	2.40824	0.954243	2.07555	2.6149	3.63033	1.57978
9223-1	9223	9223-1	0	0	0	0	0	0	1.50515	2.65418	0	1.30103	1	0	2.64246	1.64345	0.60206	0.778151	1.43136	0	0	0	0	0.845098	1.07918	1.85733	0	0	0	1.43136	0	0	0	0	0.90309	0	0	0	0	0	0.845098	0	1.51851	2.62634	1.34242	2.4014	2.86451	3.59051	1.68124
9223-2	9223	9223-2	0.778151	0.845098	0	0	0	0.477121	0.69897	3.12743	0	1.32222	0.954243	0	2.08991	0.778151	1.34242	0	1.32222	0	0	0	0	0	1	0	1.74819	0	0	0	0	0	0	0	0	0	0	0	0	0	0	0	0	2.08279	0.69897	1.63347	2.35411	3.27485	1.04139
9223-3	9223	9223-3	0	0.954243	0	0	0	0	0	2.80414	0.60206	1.47712	0.60206	0.845098	2.58883	1.62325	0.90309	0	1.11394	0	0	0	0	0	0.954243	0	1.23045	0	0	1.43136	0	0	0	0	0	0	0	0	0	0	0.954243	0	0.60206	2.46389	0.954243	1.93952	2.89376	3.61236	1.32222
9224-1	9224	9224-1	1.04139	0	0	0	0	0	0	3.12222	0	1.20412	1.07918	0	2.36922	1.38021	0	0	1.47712	0	0	0	0	0	1.11394	1.20412	2.23045	0	0	0	0	0	0	0	0	0	0	0	0	0	0	0	0.954243	2.33041	0.90309	1.91908	2.51455	3.38021	1.30103
9224-2	9224	9224-2	0.477121	0.90309	0	0	0	0	1.11394	3.03663	0	1.30103	1.14613	0.69897	2.39445	0.954243	0.778151	0	1.36173	0	0	0	0	0	1	0	2.10721	0	0	0.90309	0	0	0	0	0	0	0	0	0	0.60206	0	0	0.954243	2.36173	0.69897	1.88649	2.52244	3.32449	1
9224-3	9224	9224-3	0.30103	0	0	0	0	0	0	2.7364	0.845098	1.11394	1.17609	0.477121	2.60423	1.53148	0.69897	0	1.20412	0	0	0	0	0	0.778151	0	1.36173	0	0	0	0	1.23045	0.30103	0	0	0	0	0	0	0	1.04139	0	1.07918	2.48144	1.20412	2.14613	2.75891	3.66266	1.5682
9226-1	9226	9226-1	0.845098	0.69897	0	0	0	0	1.62325	3.22479	0.954243	1.43136	0.60206	0.778151	2.25285	1.14613	0	0.477121	1.54407	0	0	0	0	0	1.41497	1.30103	2.00432	0	0	0	0	0	0	0	0	0	0	0	0	0	0	0	1.07918	2.0086	0	1.86332	2.86273	3.45301	1.04139
9226-2	9226	9226-2	1.23045	0.954243	1.14613	0	0	0.60206	1.32222	2.98856	0.477121	1.23045	1.11394	0	2.29226	0.69897	0.778151	0	1.5563	0	0	0	0	0	1.43136	1.14613	1.85733	0	0	1.07918	0	0.954243	0	0	0	0	0	0	0	0	0.90309	0.954243	0.477121	2.08279	1.04139	1.83251	2.63749	3.3731	1.14613
9226-3	9226	9226-3	0.30103	0.778151	0	0	0	0	1.20412	2.98498	0	1.07918	0.69897	0	2.37475	0.845098	0	0	1.44716	0	0	0	0.30103	0	1.36173	0.778151	2.0086	0	0	1.63347	0	0	0	0	0	0	0.477121	0	0.30103	0	0	0.845098	0.60206	2.12057	1	2	2.70842	3.40002	1.17609
9227-1	9227	9227-1	0.954243	0.778151	0	0	0	0.30103	1.07918	2.99211	0.954243	1.36173	1.07918	0.69897	2.29447	1.30103	1	0	1.17609	0	0	0	0	0	1	0	1.83251	0	0	0.60206	0	0	0	0	0	0	0	0	0	0	0	0	0	2.2878	1.14613	2.03743	2.46982	3.28735	1.25527
9227-2	9227	9227-2	0.30103	0.778151	0	0	0	0	1.14613	3.09656	0.778151	1.23045	1.23045	0	2.41664	0.90309	0.90309	0	1.66276	0	0	0	0	0	1.11394	0.954243	2.02119	0	0	0.845098	0	0.845098	0.30103	0	0	0	0	0	0	0	0	0.845098	0.60206	2.35218	0.90309	2.12057	2.61909	3.39005	1.43136
9227-3	9227	9227-3	0	0.90309	0	0	0	0	0.477121	2.70415	0.845098	1.23045	1.17609	0.69897	2.54283	1.85733	0.778151	0	1.32222	0.60206	0	0	0	0	1.07918	1.07918	1.59106	0	0	1.20412	0	0.778151	0	0	0	0	0	0	0	0	0.954243	0.30103	1.14613	2.3075	1.07918	2.17898	2.7185	3.62634	1.57978
9229-1	9229	9229-1	0	0	0	0	0	0	0.778151	2.60853	0.778151	1.17609	1.11394	0	2.62839	1.39794	1.11394	0	0.845098	0	0	0	0	0	1.53148	0.954243	1	0	0	0.90309	0	1	0	0	0.30103	0	0	0	0	0	0	0.845098	1.20412	2.60531	1.23045	2.22272	2.79796	3.64385	1.51851
9229-2	9229	9229-2	0.954243	1.14613	0.30103	0	0.477121	0.60206	0.90309	3.09691	0.30103	1.41497	1.11394	0	2.21484	1.20412	0.30103	0	1.43136	0	0	0	0	0	1.27875	1.14613	1.97772	0	0	1.07918	0	0	0	0	0	0	0	0	0.30103	0	0.69897	0	0.69897	2.18184	1.11394	1.91908	2.55388	3.39933	0.954243
9229-3	9229	9229-3	0.477121	0.778151	0	0	0	0	0	3.11494	0	1.20412	0.845098	0.477121	2.16137	1.04139	0.477121	0	1.14613	0	0	0	0	0	1.32222	0	1.64345	0	0	0	0	0	0	0	0	0	0	0	0	0.477121	0	0	0.30103	2.04922	0.69897	1.6902	2.56467	3.3483	1
9230-1	9230	9230-1	0.954243	0	0	0	0	0	0	3.35295	0	0.90309	0	0	2.25042	1.20412	0.69897	0	1.43136	0	0	0	0	0	1.20412	0	1.47712	0	0	0.845098	0	0	0	0	0	0	0	0	0	0	0.60206	0	0.477121	2.13033	0.60206	1.88081	2.66558	3.39777	1
9230-2	9230	9230-2	0.90309	1.20412	0	0	0	0.69897	0.69897	3.18696	0	1.51851	0.845098	0.954243	2.15229	1.11394	0.778151	0.69897	1.59106	0	0	0	0	0	1.44716	0	1.86332	0	0	0.954243	0	0	0	0	0	0	0	0	0	0	0.60206	0	0.845098	2.233	0	1.61278	2.77815	3.38739	1.14613
9230-3	9230	9230-3	0.69897	0.778151	0	0	0	0	0.778151	3.21219	0	0.954243	1.04139	0.60206	2.14613	1.17609	0	0	1.54407	0	0	0	0	0	0.90309	0	1.72428	0	0	0.69897	0	0	0	0	0	0	0	0	0	0	1	0	0	2.13354	0.954243	1.78533	2.58206	3.42177	1.11394
9231-1	9231	9231-1	0.69897	0.90309	0	0	0	0	0.30103	2.66087	0.477121	0.90309	0.69897	0.477121	2.46835	1.30103	0.90309	0	1.20412	0	0	0	0	0	0.60206	1.11394	0	0	0	0.477121	0	0	0	0	0	0	0	0	0	0	0	0	1.14613	2.51055	0.778151	2.07555	2.81558	3.48244	1.17609
9231-2	9231	9231-2	1.04139	0.778151	0	0	0	0	1	3.01703	0	1.20412	1.23045	0	2.26951	1.39794	0	0	1.43136	0	0	0	0	0	1.27875	0	1.94448	0	0	1.07918	0	0	0	0	0	0	0	0	0	0	0	0.778151	0.954243	2.31597	0.60206	1.77815	2.57519	3.39515	1.14613
9231-3	9231	9231-3	0.477121	0	0	0	0	0	0.477121	2.78675	0	1.20412	0.845098	0	2.60853	1.76343	0.69897	0	0.90309	0	0	0	0	0	1.39794	1.17609	1.43136	0	0	0.477121	0	1	0	0	0	0	0	0	0	0	0	0	0.954243	2.40312	0.90309	2.07918	2.83506	3.56902	1.34242
9234-1	9234	9234-1	1	1.32222	0	0	0	0	1.17609	2.81757	0.477121	1.04139	0.60206	0	2.23805	1.17609	0.90309	0	1.30103	0	0	0	0	0	1.27875	1.86332	1.59106	0	0	1.14613	0	0	0	0	1.11394	0	0	0	0	0	0	0	1.11394	2.16732	0.778151	2	2.62118	3.31931	0.90309
9234-2	9234	9234-2	0.60206	1.14613	0	0	0	0	1.39794	3.00903	0.69897	1.32222	0.845098	0	2.38202	0.845098	0.90309	0	1.64345	0	0	0	0	0	1.53148	2.02531	0	0	0	1.74036	0	0.60206	0	0	0.954243	0	0	0	0	0	0	0.778151	1	2.11727	1.27875	1.95904	2.68574	3.37931	0.69897
9234-3	9234	9234-3	0.90309	1.14613	0	0	0	0	1.17609	3.0799	0.778151	1.39794	0.60206	0.778151	2.39794	1.25527	0	0	1.36173	0	0	0	0	0	1.17609	1.61278	2.04139	0	0	1.25527	0	0	0	0	0	0	0	0	0	0	0	0.778151	0.954243	2.17026	0.845098	1.93952	2.74663	3.44793	1.17609
9236-1	9236	9236-1	0.69897	0	0	0	0	0	1	3.24748	0	1.36173	1.04139	0	2.18184	1.07918	0.778151	0	1.5563	0	0	0	0	0	0.954243	0	1.716	0	0	0	0	0	0	0	0	0	0	0	0	0	0	0	0.69897	2.20412	0.60206	1.86923	2.65514	3.39235	1.17609
9236-2	9236	9236-2	0.30103	0.60206	0	0	0	0	1.25527	2.95952	0	1.11394	0.90309	0	2.26007	1.25527	0	0	1.36173	0	0	0	0	0	1.54407	0	1.82607	0	0	0.60206	0	0	0	0	0	0	0	0	0	0	0	0.69897	0	2.02531	0.954243	1.79239	2.51983	3.25431	0.845098
9236-3	9236	9236-3	1.14613	1.17609	0	0	0	0.69897	1.25527	2.98318	0	1.14613	1.20412	0.90309	2.36173	0.69897	0.90309	0	1.72428	0	0	0	0	0	1.30103	0	1.9345	0	0	1.23045	0	0	0	0	0	0	0	0	0	0	0	0.477121	0.778151	2.11059	0.90309	1.90309	2.48996	3.33885	1.17609
9237-1	9237	9237-1	0	0.60206	0	0	0	0	0	2.7767	0	1.39794	0.845098	0.477121	2.49554	1.23045	1.04139	0	1.14613	0	0	0	0	0	1.17609	1.17609	1.32222	0	0	0	0	0	0	0	0	0	0	0	0	0	0	0.69897	1.11394	2.31597	0.90309	1.98677	2.80482	3.51983	1.20412
9237-2	9237	9237-2	1.34242	0.778151	0	0.90309	0	0	0.845098	3.13925	0	1.34242	0.477121	0	2.16732	1.11394	0	0	1.54407	0	0	0	0	0	1.04139	0	1.81954	0	0	1.07918	0	0	0	0	0	0	0	0	0	0.60206	0	0	0	2.12057	0.778151	1.89209	2.88762	3.45621	1.11394
9237-3	9237	9237-3	0	0.60206	0	0	0	0	1	2.74741	0	1.43136	1.14613	0	2.58092	1.50515	0.69897	0.477121	1	0	0	0	0	0	1.04139	0.954243	1.63347	0.69897	0	0	0	0	0	0	0	0	0	0	0	0	0.69897	0	1.04139	2.31387	1.04139	2.09342	2.81823	3.55678	1.30103
9238-1	9238	9238-1	1	1.04139	0	0	0	0	1.04139	3.32818	0.60206	1.23045	1.07918	0.60206	2.49554	0.90309	0	0	1.11394	0	0	0	0	0	1.30103	0	2.11394	0	0	1	0	0	0	0	0	0	0	0	0	0	0	0.69897	0.69897	2.233	0.477121	1.86332	2.63144	3.46075	0.954243
9238-2	9238	9238-2	0.90309	0.60206	0	0	0	0	0.69897	3.15259	0.477121	1.39794	1.04139	0.60206	2.26245	1	0.90309	0	1.43136	0	0	0	0	0	1.30103	0	1.65321	0	0	1.30103	0	0	0	0	0.60206	0	0	0	0	0	0.778151	0	0.778151	2.31387	1.20412	1.78533	2.52114	3.37328	1.20412
9238-3	9238	9238-3	1.50515	0.845098	0	0.477121	0	0	1.23045	3.14983	0.845098	1.20412	0.954243	0.845098	2.31597	1.50515	0.845098	0	1.47712	0	0	0	0	0	1.51851	1.44716	1.83251	0	0	1.07918	0	0	0	0.30103	0	0	0	0	0	0	0.60206	0	0.90309	2.21484	0.778151	1.98227	2.51983	3.32634	0.778151
9239-1	9239	9239-1	0.778151	1	0	0	0	0	1.04139	3.20439	0	1.27875	0.845098	0.477121	2.3075	0.778151	0	0	1.5563	0	0	0	0	0	1.4624	0	1.86923	0	0	0.778151	0	0	0	0	0	0	0	0	0	0	0	0.69897	0.60206	2.11059	1.07918	1.92428	2.55871	3.36884	1.14613
9239-2	9239	9239-2	0.954243	0.845098	0	0	0	0	0	3.16406	0	1.44716	0.60206	0	2.34044	1.11394	0.954243	0	1.60206	0	0	0	0	0	1.43136	0.60206	1.65321	0	0	1.04139	0	0	0	0	0	0	0	0	0	0	0	0	0	2.17319	0.60206	1.86332	2.73159	3.39898	0.778151
9239-3	9239	9239-3	0.477121	1.11394	0	0	0	0	1.07918	2.95809	0	1.27875	1.17609	0	2.34242	1.11394	1.04139	0	1.39794	0	0	0	0	0	1.60206	1.27875	1.68124	0	0	0.69897	0.60206	0	0	0	0	0	0	0	0	0	0.69897	0	0	2.26482	1	1.80618	2.51983	3.31387	1.34242
9240-1	9240	9240-1	1.20412	0.954243	0	0	0	0	0	3.19562	0.845098	1.23045	1.04139	0	2.13672	1	0	0	1.716	0	0	0	0	0	1.11394	1.43136	1.82607	0	0	0	0	0	0	0	0	0	0	0	0	0	0.60206	0.778151	0	2.27184	1.17609	2.0607	2.60097	3.44059	1.27875
9240-2	9240	9240-2	1.23045	0.30103	0.60206	0	0	0	0.90309	3.14239	0.60206	1.25527	0.90309	0.69897	2.41664	1	1.04139	0	1.27875	0	0	0	0	0	0.845098	0	1.95424	0	0	0	0	0	0	0	0	0	0	0	0	0	0.30103	0	0	2.17026	0.69897	1.98227	2.85673	3.40278	0.954243
9240-3	9240	9240-3	0	0	0	0	0	0	0	2.7007	0	1.14613	1.07918	0	2.54283	1.79239	0.60206	0	0.845098	0	0	0	0	0	1.39794	1	1.57978	0	0	1.30103	0	0.845098	0	0	0	0	0	0	0	0	0	0.954243	0.954243	2.47276	1.14613	2.01703	2.81889	3.6052	1.36173
9242-1	9242	9242-1	0	0	0	0	0	0	1.04139	3.10687	0.778151	0.954243	1	0.90309	2.33244	1.30103	0.954243	0	1.23045	0	0	0	0	0	1.38021	0	1.716	0	0	1.25527	0	0	0	0	0	0	0	0	0.477121	0	0	0	1.04139	2.24551	1.11394	1.74036	2.57519	3.39129	1
9242-2	9242	9242-2	1.07918	0.778151	0	0	0	0	1.04139	3.06558	0	1.34242	0.845098	0	2.29667	1.36173	0.778151	0	1.25527	0	0	0	0	0	1.27875	0	1.88649	0	0	0.69897	0	0	0	0	0	0	0	0	0	0.30103	0	0	0	2.27875	0.69897	1.91908	2.55509	3.35545	1.11394
9242-3	9242	9242-3	0	0.477121	0	0	0	0	0	2.93349	0	0.69897	1.07918	0	2.61278	2.02938	0.60206	0	1.25527	0	0	0	0	0	0.954243	0.778151	1.17609	0	0	1.14613	0	0	0	0	0	0	0	0	0	0	0.69897	0	0	2.42488	0.778151	1.90309	2.76492	3.57113	1.11394
9243-1	9243	9243-1	1.11394	1	0	0	0	0	0	3.05614	0	1	1.20412	0	2.20952	0.845098	0.954243	0	1.34242	0	0	0	0	0	1.07918	0.30103	0	0.477121	0	0	0	0	0	0	0	0	0	0	0	0	0	0	0.477121	2.12057	0.778151	1.74819	2.69897	3.34713	0.60206
9243-2	9243	9243-2	1.11394	1.11394	0	0	0	0.60206	1.17609	3.00775	0	1.36173	0	0.954243	2.27416	0.90309	0	0	1.20412	0	0	0	0	0	1.23045	0	1.62325	0	0	1.04139	0	0	0	0	0	0	0	0	0	0	0	0.845098	0	2.10721	0.69897	1.9345	2.63548	3.36977	1.30103
9243-3	9243	9243-3	0.90309	1.20412	0.60206	0	0	0	1.17609	2.95999	0	1.41497	0.69897	0.60206	2.22789	1.14613	0.477121	0	1.23045	0	0	0	0	0	1.49136	0	1.62325	0	0	0.778151	0	0	0	0	0	0	0	0	0	0	0.778151	0	0.477121	1.92942	0	1.69897	2.56703	3.31952	0.60206
9244-1	9244	9244-1	1.27875	1.17609	0	0	0	0	0	3.04922	0	1.20412	0.845098	0	2.29885	1.38021	0.845098	0	1.43136	0	0	0	0	0	1.39794	0	1.89209	0	0	1.07918	0	0	0	0	0	0	0	0	0	0	0	1.17609	0	2.19312	0.845098	1.89209	2.59439	3.34577	1.11394
9244-2	9244	9244-2	1	1.20412	0	0	0	0	1.32222	2.99123	0	1.23045	0.69897	1.04139	2.40993	1.04139	0.954243	0	1.39794	0	0	0	0	0	1.32222	0	2.02119	0	0	0.954243	0	0	0	0	0	0	0	0	0	0	0	0.69897	0	2.26245	1.23045	2	2.4133	3.31931	1.07918
9244-3	9244	9244-3	0.845098	1.32222	0	0	0	0	0	3.14829	0.90309	1.39794	0.69897	0.90309	2.44871	1.86923	0.90309	0	1.14613	0	0	0	0	0	0.954243	0	2.09691	0	0	0	0	0	0	0	0	0	0	0	0	0	0	0.845098	0	2.39094	0.845098	1.69897	2.38917	3.42472	1.34242
9245-1	9245	9245-1	1.20412	0.60206	0	0	0	0	0	2.92531	0	1.04139	0.845098	0	2.34242	1.07918	0	0	1.27875	0	0	1.23045	0	0	1.39794	1.98677	1.97313	0	0	1.47712	0	0	0	0.778151	0.90309	0	0	0	0	0	0	0	0.90309	2.47276	1.25527	2.0086	2.71265	3.37585	1
9245-2	9245	9245-2	1.30103	1.20412	0	0	0	0	1.44716	2.98182	0.477121	1.23045	1.20412	0.477121	2.34044	0.90309	0	0	1.39794	0	0	0	0	0	1.39794	1.25527	1.9345	0	0	1.20412	0	0	0	0	0	0	0	0	0	0	0	0.778151	0.69897	2.29003	0.845098	1.87506	2.62118	3.34557	1.07918
9245-3	9245	9245-3	0.954243	0.90309	0	0	0	0	1.11394	3.00346	0	1.11394	0.60206	0	2.35025	1.20412	0.845098	0	1.20412	0	0	1.23045	0	0	1.39794	2.01703	1.90849	0	0	1.66276	0	0	0	0	0	0	0	0	0	0	0	0.30103	0.477121	2.26245	1.11394	1.90309	2.68034	3.33405	0.954243
9247-1	9247	9247-1	1.11394	0.90309	0	0	0	0	1.38021	3.12385	0	1.53148	1.07918	0	2.4624	1.11394	1.07918	0	1.51851	0	0	0	0	0	1.43136	0.477121	2.07188	0	0	0.90309	0	0	0	0	0	0	0	0	0	0	0.477121	0.477121	0	2.35793	0.845098	2.13672	2.69108	3.43505	1.30103
9247-2	9247	9247-2	0.954243	0	0	0	0	0	0.477121	3.11428	0	1.27875	0.90309	0.954243	2.21484	1.49136	0	0	1.44716	0	0	0	0	0	0.845098	0	1.8451	0	0	0	0	0	0	0	0	0	0	0	0	0	0	0	0	2.13988	0.778151	1.86923	2.78958	3.42275	0.954243
9247-3	9247	9247-3	0.477121	0.60206	0	0	0	0	1	2.70157	0	1.20412	1.23045	0	2.71517	1.60206	0.778151	0.477121	1.30103	0	0	0	0	0	1.30103	1.44716	1.41497	0	0.69897	1	0	0	0	0	0	0	0	0	0	0	0.477121	0.69897	0.477121	2.50106	1.17609	2.32222	2.79796	3.62818	1.50515
9248-1	9248	9248-1	0.30103	0	0	0	0	0	0.778151	2.5563	0.845098	1.04139	0	0.778151	2.56703	1.25527	0	1	1.36173	0	0	0	0.778151	0	1.23045	1.85126	0	0	0	1	0.30103	0	0	0	0.954243	0	0.477121	0	0	0	1.11394	1	1.07918	2.36736	1.17609	2.10037	2.90363	3.51508	1.23045
9248-2	9248	9248-2	0.60206	1.17609	0	0	0	0	1.54407	2.91169	0	1.27875	0.954243	0	2.11394	0.778151	0	0	1.74036	0	0	0	0.30103	0	1.44716	1.6721	1.86923	0	0	1.64345	0	0	0	0	0	0	0	0	0	0	0.30103	0.845098	0	1.92428	0.90309	1.85733	2.57171	3.2266	0.69897
9248-3	9248	9248-3	1.04139	1.23045	0	0	0	0	1.54407	2.96895	0.778151	1.11394	1.20412	0	2.3784	1.36173	0.778151	0	1.38021	0	0	0	0	0	1.716	2.04532	2.02531	0	0	1.81954	0	0	0	0	0	0	0	0	0	0	0	0	1.23045	2.14922	0.90309	1.98227	2.66464	3.37694	1.14613
9249-1	9249	9249-1	0.69897	1.11394	0	0	0	0	1.04139	3.3969	0.69897	1.61278	0.954243	0.477121	2.40312	0.954243	0.778151	0	1.53148	0	0	0	0	0	1.47712	0	2.0086	0	0	0	0	1.14613	0	0	0	0	0	0	0	0	0.30103	0	0.69897	2.38917	0.90309	2.01703	2.63649	3.51322	1.14613
9249-2	9249	9249-2	1.20412	1.04139	0	0	0	0.60206	1.20412	3.21431	0	1.44716	0.954243	0.69897	2.30963	1.23045	0.69897	0	1.47712	0	0	0	0	0	1.51851	1.14613	2.10037	0	0	1.11394	0	0	0	0	0	0	0	0	0	0	0	0	0.845098	2.26245	0.845098	2	2.5966	3.40824	1.25527
9249-3	9249	9249-3	0	0	0	0	0	0	0	2.78462	0	1.30103	0.90309	0	2.4014	1.30103	0.845098	0	1.20412	0	0	0	0	0	0.954243	0	0	0	0	0.60206	0	0	0	0	0	0	0	0	0	0	0	0.778151	0.90309	2.33041	0.778151	1.95904	2.78958	3.52686	1.14613
9251-1	9251	9251-1	0.477121	0.60206	0	0	0	0	1.30103	2.94547	1.07918	1.14613	1.07918	0.90309	2.42325	1.38021	0	0.845098	1.17609	0	0	0.477121	0	0	1.50515	1.23045	2.0569	0	0	1	0	0	0	0	0	0	0	0	0	0	0	0.477121	0	2.35603	1.04139	2.04532	2.63649	3.36399	1.20412
9251-2	9251	9251-2	0.954243	0.90309	0	0	0	0.60206	1.27875	3.16997	0	1.14613	0.954243	0.60206	2.27416	1.4624	0.60206	0	1.34242	0	0	0	0	0	1.54407	1.11394	1.94939	0	0	0.845098	0	0	0	0	0	0	0	0	0	0	0	0	0	2.12057	0.778151	1.83251	2.38561	3.37949	0.845098
9251-3	9251	9251-3	0	0.69897	0	0	0	0	0.845098	2.73159	0.845098	1.44716	1.11394	0	2.64048	1.8451	1	0	1.34242	0	0	0	0	0	1.23045	1.62325	0	0	0	1.44716	0	0	0	0	0	0	0	0	0	0	0.30103	0	1.11394	2.5172	0.954243	2.24304	2.82995	3.52022	1.54407
9252-1	9252	9252-1	0	0	0	0	0	0	1.17609	2.62737	0	1.34242	1.11394	0	2.58771	1.4624	0	0	1.32222	0	0	0	0	0	1.20412	1.30103	1.63347	0	0	0.778151	0	0	0	0	0	0	0	0	0	0	1.04139	0	1.07918	2.53529	1.11394	2.2878	2.85673	3.58715	1.36173
9252-2	9252	9252-2	0.778151	0.90309	0	0	0	0	1.20412	3.1758	0	1.23045	0.954243	0	2.39967	1.32222	0.90309	0.30103	1.43136	0	0	0	0	0	1.53148	1.27875	1.80618	0	0	1.14613	0.778151	0	0	0	0	0	0	0	0	0	1.04139	0.90309	0	2.04532	0.90309	1.95904	2.734	3.4679	1.25527
9252-3	9252	9252-3	1	1	0.69897	0	0	0.477121	1	2.96426	0.60206	1.04139	0.90309	0	2.27184	1.07918	0.69897	0	1.53148	0	0	0	0	0	1.07918	1.47712	1.70757	0	0	1.04139	0	0	0	0	0	0	0	0	0	0	0	1.11394	0	1.97772	0.477121	1.86923	2.59106	3.37676	1.25527
9253-1	9253	9253-1	0.69897	0.60206	0	0	0.477121	0	1.43136	2.95569	1.14613	1.20412	0.90309	0	2.3784	1.27875	0.954243	0	1.47712	0	0	0	0	0.778151	1.30103	1.30103	2.0086	0	0	0.90309	0	0	0	0	0.778151	0	0	0	0	0.30103	0	0	0	2.48855	1.14613	2.03743	2.60638	3.31281	1.34242
9253-2	9253	9253-2	1.04139	0.954243	0	0	0	0	1.27875	3.20737	0	1.41497	1.20412	0	2.49831	1.43136	0.954243	0	1.43136	0	0	0	0	0	1.11394	0	2.06819	0	0	1.17609	0	0	0	0	0	0	0	0	0	0.30103	0	0.30103	0	2.43775	0.954243	1.92428	2.59988	3.43088	1.27875
9253-3	9253	9253-3	0	0.30103	0	0	0	0	0.845098	3.00475	0	1.23045	1.14613	1.04139	2.617	1.64345	0.90309	0	1.27875	0	0	0	0	0	1.04139	0	1.69897	0	0	1.11394	0	0	0	0	0	0	0	0	0	0	1.23045	0.60206	0.954243	2.36549	0	1.95424	2.73159	3.70234	1.47712
9254-1	9254	9254-1	0.954243	0.477121	0	0	0	0	0	3.20978	0	1.34242	1	0.477121	2.18184	0	0	0	1.39794	0	0	0	0.778151	0	1.41497	0	1.83251	0	0	0	0	0	0	0	0	0	0	0	0	0	0	0	0.69897	2.02938	0.69897	1.85733	2.46538	3.40773	0.845098
9254-2	9254	9254-2	1.04139	0.845098	0.477121	0	0	0	0.60206	3.23805	0	1.27875	0.954243	1.11394	2.23553	1.17609	0	0	1.51851	0	0	0	0	0	1.47712	0	1.74036	0	0	0	0	0	0	0	0	0	0	0	0	0	0	0	0.954243	2.05308	0.778151	1.81291	2.48996	3.48601	1.20412
9254-3	9254	9254-3	1	0.30103	0	0	0	0	0	2.94988	0.477121	1.32222	0.90309	0.778151	2.18184	0.845098	0.69897	0.60206	1.36173	0	0	0	0	0	1.07918	0	2.02531	0	0	0.778151	0	0	0	0	0	0	0	0	0	0	0	0	0	2.0607	0.778151	1.81291	2.4216	3.28035	0.778151
9256-1	9256	9256-1	1	0.778151	0	0	0	0	0	3.14395	0	1.11394	0.90309	0	2.24551	0	0.778151	0	1.44716	0	0	0	0	0	1.30103	0	1.6902	0	0	0	0	0	0	0	0	0	0	0	0	0	1	0	0.778151	2.3075	0.954243	1.5682	2.50106	3.35736	1
9256-2	9256	9256-2	0.60206	1	0	0	0	0	1.11394	3.04922	0.845098	1.38021	1.14613	0.845098	2.42325	1.14613	0.845098	0	1.54407	0	0	0	0	0	1.43136	1.04139	1.86332	0	0	0.845098	0	0	0	0	0	0	0	0	0	0	0	0.778151	0	2.24055	1	2.11059	2.56348	3.3934	0.954243
9256-3	9256	9256-3	0.60206	0	0	0	0	0	0.778151	3.00732	0	1.32222	0.954243	0.954243	2.24797	1.07918	0.778151	0	1.39794	0	0	0	0	0	1.20412	0	1.5563	0	0	1.07918	0	0	0	0	0	0	0	0	0	0	0	0	0	2.18469	1.04139	1.77815	2.45332	3.32077	0.69897
9257-1	9257	9257-1	1.11394	0.954243	0	0	0	0	0	3.37985	0.90309	1.39794	1.34242	0.778151	2.4133	1.27875	0.845098	0	1.51851	0	0	0	0	0	1.41497	0	1.76343	0	0	1.07918	0	0	0	0.69897	0	0	0	0	0	0	1	0	1.30103	2.22011	0	1.79934	2.67486	3.55751	1.11394
9257-2	9257	9257-2	1.81291	1.5682	0.69897	0	0.69897	0	1.61278	3.07188	1.36173	1.49136	1.43136	0.69897	2.09342	1.17609	1.93952	1.60206	2.49136	0	1.27875	0	0.477121	0.778151	2.29447	2.617	1.78533	0	0	1.77085	1	0.845098	0.69897	1.11394	0	0.845098	1.30103	0	2.10037	0	2.07188	1.6902	0.69897	2.07555	0.845098	1.73239	2.44404	3.24279	0.845098
9257-3	9257	9257-3	1.11394	1.14613	0	0	0	0	1.36173	3.03583	0	1.38021	0.90309	0.477121	2.31806	1.04139	1.04139	0	1.60206	0	0	0	0	0	1.32222	1.07918	2.0569	0	0	1.04139	0	0	0	0	0	0	0	0	0	0	0.30103	0	0	2.11727	0.60206	1.88081	2.49969	3.33385	1.27875
9258-1	9258	9258-1	0	0.69897	0	0	0	0	1	2.65801	0.954243	1.07918	1.20412	1.11394	2.4609	1.14613	0	0	1.23045	0	0	0	0	0	0.69897	1.6902	1.61278	0	0	0.30103	0	1.11394	0	0	0	0	0	0	0	0	0	0	1.23045	2.27416	1.11394	2.21219	2.77159	3.50623	1.41497
9258-2	9258	9258-2	1.04139	1.30103	0	0	0	0	1.30103	2.96895	0	1.32222	1.20412	0	2.27184	1.23045	0.69897	0	1.43136	0	0	0	0	0	1.47712	0	1.95424	0	0	1.50515	0	0	0	0	0	0	0	0	0	0	0	0	0.90309	1.92942	0	1.78533	2.57171	3.32797	1.39794
9258-3	9258	9258-3	0	0.69897	0	0	0	0	0.954243	2.6721	0.90309	1.17609	1.39794	0	2.62014	1.66276	0	0.69897	1.32222	0	0	0.845098	0	0	1.04139	1.94939	1.4624	0	0	1.68124	1.04139	1.07918	0	0	0	0	0	0	0	0	0	1	1.11394	2.36173	1.07918	2.13988	2.86332	3.59857	1.27875
9260-1	9260	9260-1	1.11394	0	0	0	0.477121	0	0.477121	3.18977	0	0.954243	1.25527	0	2.11059	0.954243	0.778151	0	1.49136	0	0	0	0	0	1.17609	0	1.69897	0	0	0	0	0	0	0	0	0	0	0	0	0	0.778151	0	0.90309	2.14301	1.14613	1.96379	2.67578	3.43616	1.07918
9260-2	9260	9260-2	0	0	0	0	0	0	0	3.19948	0	1.44716	1.23045	0	2.35603	0.845098	1	0	1.38021	0	0	0	0	0	1.5563	0	2.04532	0	0	0.60206	0	0	0.778151	0	0	0	0	0	0	0	1	0	0.954243	2.32015	0.90309	1.88081	2.4456	3.48216	1.34242
9260-3	9260	9260-3	0.845098	0.477121	0	0	0	0	0	3.19257	0.60206	1.27875	0.90309	0.60206	2.3032	1.17609	0	0	1.44716	0	0	0	0	0	0.778151	0	1.72428	0	0	1.04139	0	0	0	0	0	0	0.30103	0	0	0	0.30103	0.845098	0.90309	2.22789	0	1.4624	2.51983	3.38899	1.14613
9262-1	9262	9262-1	0	0	0	0	0	0	0.845098	3.31069	1	1.61278	1.07918	0	2.49554	1.32222	0.69897	0	1.50515	0	0	0	0	0	1.39794	0	1.79239	0	0	0.69897	0	0	0	0	0	0	0	0	0	0	0	0.30103	0	2.42813	1	2.04922	2.67394	3.54679	0.69897
9262-2	9262	9262-2	0.845098	1.11394	0	0	0	0	0	3.19645	0.90309	1.5682	1.17609	0.778151	2.32428	0.845098	0.778151	0	1.39794	0	0	0	0	0	1.54407	0.954243	1.85126	0	0	0	0	0	0	0	0	0	0	0	0	0	0	0.845098	1.04139	2.26007	0.60206	1.72428	2.85733	3.44342	1.20412
9262-3	9262	9262-3	1.11394	0.778151	0	0	0	0	1.11394	3.01326	0.69897	1.36173	0.778151	0	2.41162	1	1	0	1.43136	0	0	0	0	0	1.27875	0	2.0607	0	0	0.30103	0	0	0	0	0	0	0	0	0	0	0.845098	0	0	2.26951	1.04139	1.92428	2.43136	3.32654	1.07918
9264-1	9264	9264-1	1.11394	0.30103	0	0	0	0	1.04139	3.17464	0	1.41497	0.954243	0.90309	2.34242	1.34242	0.69897	0.90309	1.34242	0	0	0	0	0	1.25527	1.36173	2.07555	0	0	1.04139	0	0	0	0	0	0	0	0	0	0	0	0	1.07918	2.38917	0.954243	1.94939	2.71933	3.3948	1.07918
9264-2	9264	9264-2	0	0	0	0	0	0	0.954243	2.75891	0.477121	1.23045	0.845098	0	2.48714	1.38021	0.778151	0	1.39794	0	0	0	0	0	1.17609	1.30103	1.34242	0	0	1.5563	0	0	0	0	0	0	0	0	0	0	0.30103	0.60206	1.14613	2.5092	1.27875	2.13988	2.84323	3.45697	1.17609
9264-3	9264	9264-3	1.04139	0.778151	0	0	0	0	1.11394	3.03663	0	1.11394	0.954243	0	2.38739	1.14613	0.60206	0	1.43136	0	0	0	0	0	1.27875	0	1.99123	0	0	0.845098	0	0	0	0	0	0	0	0	0	0	0	0	0.778151	2.233	0.778151	1.88081	2.59329	3.36736	1.11394
9265-1	9265	9265-1	0.30103	0.30103	0	0	0	0	1.34242	3.077	0.60206	1.17609	0.954243	0.778151	2.34635	1.17609	0	0.778151	1.41497	0	0	0	0	0	1.23045	1.14613	1.78533	0	0	0.90309	0	0	0	0	0	0	0	0	0	0	1	0	0.69897	2.3927	0.60206	2.00432	2.6721	3.42226	1.25527
9265-2	9265	9265-2	1.07918	0.845098	0	0	0	0	0.778151	3.1116	0.477121	1.34242	0.954243	0.60206	2.34635	1.34242	0.477121	0	1.36173	0	0	0	0	0	1.36173	0	1.85733	0	0	0.954243	0	0	0	0	0	0	0	0	0.30103	0	0	0	0.778151	2.1038	0.778151	1.89209	2.51851	3.37033	1.23045
9265-3	9265	9265-3	0.90309	1.30103	0	0	0	0	1.04139	2.94349	0.60206	1.14613	0.778151	0.477121	2.31597	0.954243	0.845098	0.69897	1.57978	0	0	0	0	0	1.30103	1.4624	2.0569	0	0	1.43136	0	0	0	0.30103	0.477121	0	0	0	0	0	0	0	0	2.20952	1.07918	1.91908	2.54033	3.29645	1.17609
9266-1	9266	9266-1	1.14613	0.954243	0	0	0	0	0	3.26387	0.845098	1.23045	1.20412	0	2.35411	1.47712	0.778151	0	1.34242	0	0	0	0	0	1.30103	0	2.04922	0	0	0	0	0	0	0	0	0	0	0	0.69897	0	0	0	0	2.17609	0.778151	1.96379	2.55023	3.43759	1.11394
9266-2	9266	9266-2	0.954243	1.04139	0	0	0	0	0.954243	3.16938	0	1.38021	0.845098	0.60206	2.3927	1.20412	0.778151	0.778151	1.47712	0	0	0	0	0	1.44716	0.954243	2.01284	0	0	0.477121	0	0.845098	0	0	0	0	0	0	0	0	0	0	0.30103	2.36736	0.60206	1.93952	2.70927	3.43345	1.30103
9266-3	9266	9266-3	0	0.69897	0	0	0	0	1.11394	2.67302	1.20412	1.39794	1.44716	1.14613	2.76118	1.6721	1.36173	0	1.17609	0	0	0	0	0	1.04139	1.5682	1.44716	0	0	1.53148	0	0	0	0	0	0	0	0	0	0	0.69897	0.845098	1.04139	2.67025	1.41497	2.40312	2.93298	3.65839	1.76343
9268-1	9268	9268-1	1.23045	1.07918	0	0	0	0.477121	1.23045	3.22608	0.90309	1.43136	0.477121	0	2.3962	1.17609	1.04139	0	1.39794	0	0	0	0	0	1.5682	0.845098	1.92428	0.477121	0	1.17609	0	0	0	0	0	0	0	0	0	0	0.778151	0	1.23045	1.83251	1.04139	1.85126	2.68215	3.42012	1.17609
9268-2	9268	9268-2	0.845098	0.69897	0	0	0.30103	0.90309	1	3.23704	0.60206	1.39794	1.11394	0.30103	2.28556	1.07918	0.845098	0	1.36173	0	0	0.90309	0	0	1.30103	0	1.69897	0	0	0	0	0	0	0	0	0	0	0	0	0	0	0.69897	0.954243	1.93952	0.845098	1.74819	2.38561	3.45849	1.14613
9268-3	9268	9268-3	0.90309	0	0	0	0	0	1.04139	3.06108	0	1.27875	1.07918	0	2.20952	1.34242	0	0	1.34242	0	0	0	0	0	1.36173	0.30103	1.6721	0	0	0.845098	0	0	0	0	0	0	0	0	0	0	0.60206	0.90309	0	1.81291	1	1.8451	2.53148	3.37493	0.477121
9269-1	9269	9269-1	0	0.30103	0	0	0	0	1.34242	2.73159	0	1.27875	1.07918	0.69897	2.69461	1.51851	0.60206	0	1.17609	0	0	0	0	0	1.25527	1.81291	1.34242	0	0	1.17609	0	0	0	0	1.04139	0	0	0	0	0	0	0.845098	0.845098	2.62221	1.23045	2.25042	2.89873	3.56996	1.49136
9269-2	9269	9269-2	0.90309	1.07918	0	0.477121	0	0	1.04139	3.03222	0.778151	1.23045	0.778151	0	2.21219	1.23045	0	0	1.4624	0	0	0	0	0	1.41497	0	1.66276	0	0	0.778151	0	0	0	0	0	0	0	0	0	0	0.69897	0	0	2.13988	1	1.8451	2.5977	3.35295	1.07918
9269-3	9269	9269-3	0	1	0	0	0.30103	0	0	2.9987	1.54407	1.17609	0.954243	0.954243	0	1	1.25527	1.30103	2.34044	0	1.11394	0.477121	0.69897	0.477121	2.1271	2.77887	1.14613	0.69897	0	2.15836	1.63347	1.27875	0.778151	0	1	0	0.30103	0.30103	0	0	2.29226	1.69897	0	2.65031	1.34242	2.02531	2.65321	3.35257	1.30103
9270-1	9270	9270-1	0.60206	0	0	0	0	0	0.954243	3.05843	0.60206	1.23045	0.90309	0	2.13672	1	0	0	1.53148	0	0	0	0	0	1.20412	0	1.90849	0	0	0	0	0	0	0	0	0	0	0	0	0	0	0	0.60206	2.26951	1	1.91381	2.61278	3.34694	1.11394
9270-2	9270	9270-2	0	0.30103	0	0	0	0	1.4624	2.85854	0.90309	1.44716	1.25527	0.954243	2.73078	1.65321	0.845098	0	1.41497	0	0	0	0	0	0.90309	1.54407	1.70757	0	0	1.44716	0	0.778151	0	0	0	0	0	0	0	0	0.477121	1.04139	0.954243	2.58092	1.11394	2.24304	2.83696	3.55145	1.4624
9270-3	9270	9270-3	0.845098	0.90309	0	0	0	0	1.23045	2.99826	0	1.20412	1.04139	0	2.34044	1.07918	1	0	1.39794	0	0	0	0	0	1	1.07918	2.12057	0	0	0	0	0	0.477121	0	0	0	0	0	0	0	0	0.30103	0	2.27416	0.954243	1.88081	2.51587	3.34262	1.30103
9271-1	9271	9271-1	0	0	0	0	0	0	0.954243	3.16316	0	1.27875	1.11394	0	2.38021	1.30103	0	0	1.36173	0	0	0	0	0	0.845098	1.07918	1.85733	0	0	0	0	0	0	0	0	0	0	0	0	0	0	0.477121	1.04139	2.29226	1.11394	1.90309	2.83569	3.44948	1.32222
9271-2	9271	9271-2	0.778151	1	0	0	0	0	0.845098	3.14301	0	1.39794	0.90309	1.14613	2.32838	1.38021	0.477121	0	1.23045	0	0	0	0	0	1.30103	0	1.88081	0	0	1.14613	0	0.60206	0	0	0	0	0	0	0	0	0.778151	0.69897	0.845098	2.30535	1.17609	1.95904	2.716	3.38917	1.20412
9271-3	9271	9271-3	1.11394	0.778151	0	0	0.30103	0.477121	1.11394	3.14019	0.60206	1.38021	1	0	2.36361	1.4624	0	0	1.41497	0	0	0	0	0	1.27875	0	2.01703	0	0	0.477121	0	0.778151	0	0	0	0	0	0	0	0	0	0	0	2.1959	1.07918	1.83251	2.65706	3.4304	1.17609
[truncated: 37 more columns]

## Sheet: Dataset S2_RGB
accessionID	RGBPC1
9205	-2.48888
9174	-2.03377
9171	-1.95908
9266	-1.89664
9013	-1.88388
8969	-1.88313
9168	-1.86861
8869	-1.80371
8940	-1.80212
8926	-1.79448
9229	-1.76389
8995	-1.73647
9046	-1.72612
8908	-1.64262
8961	-1.63583
8848	-1.62986
9155	-1.62464
8948	-1.62163
9038	-1.61742
8890	-1.61029
8966	-1.60576
8985	-1.60515
8888	-1.60268
8847	-1.59802
9238	-1.58211
8982	-1.5237
9006	-1.50438
8990	-1.49926
8902	-1.48735
8879	-1.47074
9148	-1.46968
9223	-1.46121
9269	-1.46092
9242	-1.45691
9173	-1.44964
9176	-1.43768
8889	-1.43609
9264	-1.42824
9204	-1.42555
8841	-1.4239
8824	-1.42021
9034	-1.41745
9156	-1.41253
8850	-1.4076
8882	-1.39927
8794	-1.37402
9230	-1.34714
9256	-1.33974
8772	-1.33579
9195	-1.3339
8825	-1.33271
8769	-1.32903
8904	-1.32849
9019	-1.3262
9199	-1.32528
8863	-1.31307
8910	-1.31245
8905	-1.30743
9192	-1.30377
9210	-1.27899
8968	-1.27231
9172	-1.26864
8786	-1.26798
9239	-1.26755
8845	-1.25887
8911	-1.25635
9188	-1.25175
8983	-1.2516
8859	-1.23728
8918	-1.22206
9179	-1.21985
9152	-1.21284
9043	-1.19943
8892	-1.19541
8761	-1.19489
9202	-1.19346
9047	-1.17801
9021	-1.1751
9267	-1.17014
8917	-1.16297
9233	-1.1447
8857	-1.14274
8932	-1.14252
8759	-1.12912
8920	-1.12581
9228	-1.11521
8930	-1.10779
8795	-1.10302
8814	-1.09788
8819	-1.08789
9180	-1.08685
9262	-1.08649
8898	-1.07644
8765	-1.07562
8868	-1.07475
8790	-1.07391
8780	-1.06939
8768	-1.06462
8822	-1.05069
9154	-1.04822
8914	-1.0459
8789	-1.04302
9018	-1.04145
9033	-1.0381
8960	-1.03242
8984	-1.03048
9153	-1.02853
8991	-1.02515
8804	-1.0235
9227	-1.01664
9147	-1.01525
9001	-1.01287
9194	-1.01253
8945	-1.01137
8981	-1.00408
8818	-1.00083
8959	-0.976267
8941	-0.975283
8792	-0.973326
8764	-0.967879
8944	-0.964771
8986	-0.960191
9025	-0.956543
9270	-0.955817
8831	-0.954224
8933	-0.953567
9185	-0.95164
8778	-0.94355
9231	-0.942509
8938	-0.938491
9240	-0.93796
8934	-0.935643
9029	-0.934712
8858	-0.932749
9208	-0.923011
8937	-0.920376
9159	-0.920168
8913	-0.91927
8896	-0.918804
8942	-0.91535
8886	-0.910112
9184	-0.899968
9254	-0.898676
8773	-0.89035
9060	-0.888376
8949	-0.887858
8813	-0.87904
8971	-0.876904
9214	-0.874066
8833	-0.867464
9054	-0.865623
8883	-0.863716
8993	-0.858499
8967	-0.85135
9190	-0.845282
9186	-0.8415
8978	-0.838034
9024	-0.829298
8924	-0.82132
9149	-0.815831
8864	-0.812223
9247	-0.809308
9049	-0.807282
8965	-0.804964
8871	-0.804109
8885	-0.803739
8854	-0.797916
9251	-0.786091
9002	-0.778118
8963	-0.773937
9166	-0.773163
8919	-0.771197
8781	-0.770641
8877	-0.756194
9030	-0.754829
8916	-0.753928
9257	-0.7538
9244	-0.749866
9007	-0.741822
9041	-0.727672
8770	-0.721665
9145	-0.718226
9160	-0.711321
9260	-0.710941
9037	-0.702469
8806	-0.701446
8774	-0.694122
9203	-0.691613
8788	-0.691404
9222	-0.691305
9051	-0.689001
9158	-0.688238
8935	-0.677016
8996	-0.674029
9009	-0.664654
9169	-0.663991
8972	-0.662121
8826	-0.654349
8887	-0.651427
8775	-0.648267
8827	-0.64681
8787	-0.645112
8812	-0.644914
8958	-0.640041
8953	-0.638705
8970	-0.636488
8805	-0.63252
8943	-0.629776
9015	-0.629066
9014	-0.626373
9271	-0.621804
9020	-0.620863
9039	-0.606747
9237	-0.599625
8903	-0.596129
9191	-0.580882
8946	-0.575812
8862	-0.55888
8992	-0.558144
9249	-0.533243
8796	-0.532287
9058	-0.529409
8801	-0.52786
8807	-0.525793
8838	-0.521819
8979	-0.519275
8820	-0.518884
8973	-0.518576
8803	-0.505491
9036	-0.503881
8776	-0.496788
9198	-0.486375
9221	-0.476873
9028	-0.476797
8873	-0.474694
9027	-0.470612
9035	-0.461172
9050	-0.460444
8899	-0.458807
8840	-0.454294
8835	-0.439946
9032	-0.438617
8909	-0.417219
8928	-0.411684
8870	-0.403228
8977	-0.399616
8861	-0.396557
8936	-0.387717
8800	-0.386666
9026	-0.383744
8760	-0.381336
9253	-0.375528
8791	-0.32689
9224	-0.323577
9150	-0.314133
8998	-0.304965
9040	-0.269532
9005	-0.261822
8828	-0.261497
9045	-0.255497
8925	-0.223471
8798	-0.216002
8912	-0.201115
9236	-0.200294
9057	-0.193424
9181	-0.182327
8777	-0.181511
9207	-0.180824
8921	-0.172202
9209	-0.170309
8849	-0.156139
8872	-0.140569
9011	-0.125326
9182	-0.0788952
9010	-0.0763844
8844	-0.0526032
8880	-0.0317504
9201	-0.02842
8975	-0.0261018
8852	-0.0116348
9217	0.0130883
9200	0.0154048
8939	0.0225552
8878	0.0289053
8957	0.0313165
9215	0.0405437
8763	0.0676552
8793	0.0682201
9218	0.0825346
8929	0.107863
8767	0.127095
8837	0.132199
8956	0.145411
9246	0.155285
8836	0.165148
9151	0.187605
8855	0.214757
8783	0.221051
9146	0.231506
8875	0.244705
9177	0.279335
8802	0.356333
8811	0.394491
8856	0.427463
9008	0.434621
9022	0.438997
8846	0.511621
9053	0.649058
9170	0.67717
9004	0.714567
8974	0.788377
8874	0.863145
8976	0.958402
8782	0.963957
8809	1.28123
9243	1.28931
8989	1.4114
9059	1.44716
8876	1.50141
8784	1.63433
8823	1.68218
9056	1.82366
8915	1.85793
9000	1.89193
9234	1.95192
8988	1.96414
8865	1.99892
8799	2.06309
8964	2.13603
9193	2.15978
9165	2.17973
9248	2.19687
8785	2.20018
8830	2.21281
8952	2.21295
8894	2.23866
9144	2.26112
9206	2.31895
8947	2.32579
9017	2.34881
9163	2.37075
9175	2.39309
8839	2.40838
9258	2.4127
8808	2.421
8829	2.55367
8771	2.6271
8834	2.64848
8884	2.66404
8901	2.67032
8900	2.72656
8922	2.77109
9265	2.87487
8853	2.87649
8816	3.0948
8923	3.16006
9211	3.1698
8907	3.20381
8766	3.25472
8994	3.28469
8955	3.28489
9268	3.35584
9250	3.37256
8931	3.38441
9003	3.43368
8951	3.55313
9052	3.64531
8999	3.64613
8821	3.6497
8779	3.72375
8851	3.77101
8893	3.93109
8815	4.0315
9023	4.04102
8997	4.12904
8832	4.18979
9261	4.22366
9178	4.22859
8987	4.37559
9252	4.40043
9031	4.46221
9212	4.47471
8950	4.6598
8881	4.7432
9245	4.74391
8897	4.80714
9226	4.86411
9216	5.00287
9167	5.03595
9183	5.08345
9016	5.27
8954	5.29477
9048	5.60871

## Sheet: Dataset S3_Tannin_content
accessionID	TanninContent(mg/g)
8759	5.23174
8760	7.29905
8764	4.14754
8765	7.63205
8769	6.03733
8771	4.91145
8772	5.84777
8773	5.93123
8774	5.34482
8775	7.52479
8777	6.25834
8779	NA
8784	20.3891
8785	19.2262
8786	5.65807
8787	6.90885
8788	5.49165
8789	7.7705
8790	6.75762
8794	4.69975
8798	4.78322
8799	17.468
8800	5.87974
8801	3.61714
8803	3.28416
8804	5.94929
8807	4.78838
8808	10.8794
8812	4.05763
8814	5.00923
8815	28.7869
8819	4.19333
8820	6.91632
8822	7.04015
8823	24.5683
8824	6.0913
8827	4.69909
8828	4.93019
8829	7.5908
8835	6.0039
8837	5.47361
8838	4.5181
8839	16.009
8840	9.60184
8841	5.32314
8844	7.78816
8846	23.7096
8847	5.66954
8848	5.38973
8850	5.88983
8851	21.7363
8853	88.3269
8854	5.47869
8855	7.10953
8856	17.8806
8857	6.32083
8858	4.85102
8859	7.64552
8861	5.38373
8862	6.74681
8864	5.80435
8865	5.16788
8868	5.59845
8869	6.65057
8871	6.50577
8872	4.87607
8874	0.0901408
8875	53.8168
8876	4.87285
8877	27.8517
8878	6.00984
8879	5.06946
8880	9.43218
8881	70.774
8882	61.2694
8883	2.4929
8884	28.1748
8885	4.16651
8886	20.3782
8887	6.19779
8888	4.77013
8889	8.0988
8892	7.25024
8893	56.479
8894	7.23954
8896	6.07998
8897	52.1576
8898	6.31473
8899	4.61875
8900	52.2792
8901	41.8755
8902	8.59192
8903	5.10699
8904	5.65964
8905	5.61309
8907	64.0598
8908	4.07029
8909	5.28907
8911	5.56623
8913	5.48004
8915	42.1232
8917	7.34615
8918	5.4953
8919	5.93969
8920	0.963484
8922	44.2253
8924	7.73293
8925	6.4365
8926	6.46275
8928	7.65421
8930	6.92914
8931	4.70096
8932	6.97618
8933	5.90826
8934	5.68193
8935	8.30737
8936	6.52032
8937	6.04327
8938	6.40522
8939	5.73547
8940	5.55647
8941	7.35166
8942	5.97582
8945	3.80991
8947	6.69949
8948	3.27329
8949	5.38716
8950	26.2567
8953	61.1591
8955	4.46282
8957	4.9052
8958	5.31011
8959	4.94486
8960	4.68141
8961	5.49336
8964	4.43905
8966	5.57904
8967	5.63115
8969	5.19999
8971	5.82117
8974	5.93692
8978	6.61415
8979	6.47748
8981	6.01984
8982	7.25283
8983	5.18425
8985	8.37846
8986	6.10836
8987	44.8409
8988	46.906
8989	19.6671
8990	5.35694
8992	7.70065
8993	7.78235
8994	23.2301
8995	7.46653
8997	59.7492
8998	7.12431
8999	42.9854
9000	15.8328
9001	6.50325
9002	6.33437
9003	53.1489
9004	5.25904
9005	7.46578
9006	7.66873
9008	3.26498
9010	6.22275
9013	6.18325
9015	6.03308
9016	40.5387
9017	26.2066
9018	6.66876
9019	6.64773
9020	5.23648
9021	5.23726
9023	118.076
9026	4.32044
9027	4.91612
9028	22.7223
9029	7.05101
9031	105.005
9033	7.33667
9034	5.13608
9035	7.46578
9036	5.75869
9037	4.61017
9038	4.96304
9039	5.79921
9041	6.63495
9043	7.03447
9046	6.51684
9052	51.8155
9053	8.82946
9054	8.27727
9056	20.1302
9057	4.9837
9059	14.0962
9060	5.90572
9144	35.2972
9145	7.5082
9146	6.13543
9147	4.67214
9148	7.49971
9149	7.62624
9150	6.05215
9152	5.88696
9153	5.28907
9154	6.30318
9155	4.77535
9156	3.77907
9158	4.6891
9159	5.93692
9160	4.72853
9163	17.9684
9167	71.4136
9168	4.18105
9169	5.61595
9170	6.30005
9171	5.43239
9172	5.29196
9173	5.68479
9174	6.70751
9175	12.4848
9176	5.50999
9177	5.60748
9179	6.94719
9180	9.46988
9181	5.74621
9182	6.60814
9183	86.7542
9184	5.87022
9185	6.60203
9188	7.33145
9190	5.39572
9191	5.19211
9194	5.72276
9198	4.71258
9199	6.43167
9200	4.14964
9201	4.22279
9202	5.06547
9203	6.42638
9204	5.46995
9205	5.90826
9206	4.84076
9207	5.68417
9208	6.49013
9209	8.63204
9210	6.19513
9211	50.2985
9212	82.3939
9214	7.0604
9215	6.24188
9216	87.1898
9218	5.99885
9221	6.19802
9222	7.35166
9223	6.01402
9224	7.67142
9226	60.2146
9227	6.10836
9229	5.74736
9230	5.78821
9231	5.77937
9234	35.2523
9236	6.65105
9237	6.13701
9238	6.10836
9239	6.35363
9240	6.58618
9242	6.05746
9243	10.3378
9244	6.79136
9245	60.7937
9247	1.91288
9248	33.2798
9249	5.81874
9251	5.65477
9252	95.0324
9253	6.1412
9254	4.39876
9256	6.40867
9257	5.62032
9258	26.8392
9260	5.94732
9262	5.33436
9264	5.49877
9265	4.63236
9266	4.64663
9268	8.06953
9269	5.46538
9270	5.81516
9271	5.49877

## Sheet: Dataset S4_By_Haplotype
S4_61878324	S2_7930509	accessionID	Tan1	Tan2	Haplotype	RGBPC1	TanninContent	ChristensenellaceaeR.7group	Faecalibacterium	Roseburia	Coprococcus1	Catenibacterium	Paeniclostridium	RuminococcaceaeUCG.002	Paraprevotella
2	1	8771	Tan1	Tan2	Tan1.Tan2	2.6271	4.91145	0.000776598	0.000143313	0.0147985	0.004034	0.0019415	0.000249895	0.000668738	0.0143455
2	1	8779	Tan1	Tan2	Tan1.Tan2	3.72375	NA	0.00112175	0.00513418	0.011347	0.00830529	0.000862887	0.000776598	0.000862887	0.0139572
2	1	8784	Tan1	Tan2	Tan1.Tan2	1.63433	20.3891	0.00187678	0.0213133	0.0156614	0.00541462	0.00120804	0.000638437	1.96781e-05	0.0133532
2	1	8785	Tan1	Tan2	Tan1.Tan2	2.20018	19.2262	0.00144534	0.0195444	0.0160928	0.00765812	0.00069031	3.34632e-05	0.000180305	0.0118
2	1	8799	Tan1	Tan2	Tan1.Tan2	2.06309	17.468	0.00129433	0.00256709	0.0114548	0.00757184	0.00332212	2.94225e-05	0.000444925	0.0138062
2	1	8808	Tan1	Tan2	Tan1.Tan2	2.421	10.8794	0.000608441	0.00073803	0.00776598	0.00215722	0.00228665	0.00125114	0.00110018	0.0174087
2	1	8815	Tan1	Tan2	Tan1.Tan2	4.0315	28.7869	0.000517732	2.37552e-05	0.00724825	0.00211407	0.00220036	0.0010863	0.000613711	0.0147554
2	1	8823	Tan1	Tan2	Tan1.Tan2	1.68218	24.5683	0.000517732	5.79762e-05	0.00968591	0.00129433	0.00224351	0.00263902	0.000112468	0.00862887
2	1	8846	Tan1	Tan2	Tan1.Tan2	0.511621	23.7096	0.00196307	0.0124471	0.0229959	0.0131375	0.000949176	4.20557e-05	0.000358964	0.0130296
2	1	8851	Tan1	Tan2	Tan1.Tan2	3.77101	21.7363	0.00103546	0.00194092	0.0145612	0.00522047	0.00125119	4.10015e-05	0.00184118	0.0122961
2	1	8853	Tan1	Tan2	Tan1.Tan2	2.87649	88.3269	0.00101389	0.000459934	0.0151221	0.00444387	0.00243766	0.00545776	0.00140219	0.0195228
2	1	8856	Tan1	Tan2	Tan1.Tan2	0.427463	17.8806	0.00174735	0.00812281	0.0163517	0.011951	0.00485374	0.00537147	0.00267495	0.00944862
2	1	8875	Tan1	Tan2	Tan1.Tan2	0.244705	53.8168	0.000539305	2.02154e-05	0.00972905	0.00235137	0.00284753	0.00419198	0.00282596	0.01331
2	1	8877	Tan1	Tan2	Tan1.Tan2	-0.756194	27.8517	0.000949176	0.00366727	0.0145396	0.0074424	0.00321425	2.92727e-05	0.000668738	0.0154457
2	1	8881	Tan1	Tan2	Tan1.Tan2	4.7432	70.774	0.000508193	0.000582449	0.00679524	0.000970748	0.00110018	0.000935872	0.000733454	0.0157477
2	1	8893	Tan1	Tan2	Tan1.Tan2	3.93109	56.479	0.00196307	0.0138278	0.0196307	0.021831	0.00463802	0.000238872	0.000901682	0.0151652
2	1	8897	Tan1	Tan2	Tan1.Tan2	4.80714	52.1576	0.000906032	0.000269093	0.00811114	0.00135905	0.000651767	0.0038025	0.000198359	0.0102684
2	1	8915	Tan1	Tan2	Tan1.Tan2	1.85793	42.1232	0.000819743	0.00260421	0.0116274	0.00377513	0.00377513	0.000127382	0.000654573	0.0139572
2	1	8922	Tan1	Tan2	Tan1.Tan2	2.77109	44.2253	0.000900827	0.000250353	0.00802485	0.000949176	0.00282596	0.000892425	0.00247073	0.0121667
2	1	8947	Tan1	Tan2	Tan1.Tan2	2.32579	6.69949	0.00198211	0.0428745	0.00841315	0.00676665	0.00225004	0.00388299	0.00151005	0.0117784
2	1	8949	Tan1	Tan2	Tan1.Tan2	-0.887858	5.38716	0.000570917	0.00068377	0.00901717	0.00649323	0.000798171	0.00266372	0.000927604	0.0168263
2	1	8953	Tan1	Tan2	Tan1.Tan2	-0.638705	61.1591	0.0013159	0.00373199	0.0170636	0.00681681	0.00211407	0.000390678	0.000539305	0.0101174
2	1	8987	Tan1	Tan2	Tan1.Tan2	4.37559	44.8409	0.000525916	0.00552248	0.0146475	0.00670895	0.0015532	2.92263e-05	3.63819e-05	0.00979377
2	1	8989	Tan1	Tan2	Tan1.Tan2	1.4114	19.6671	0.000625593	0.000733454	0.0124903	0.00302011	0.00250237	0.000883414	0.000841315	0.015683
2	1	8994	Tan1	Tan2	Tan1.Tan2	3.28469	23.2301	0.00163949	0.012857	0.0140866	0.00261023	0.00304168	0.000164713	0.000345528	0.00847787
2	1	8997	Tan1	Tan2	Tan1.Tan2	4.12904	59.7492	0.00118647	0.000421242	0.00962119	0.00157477	0.00135905	0.000296657	0.000326189	0.00642851
2	1	9000	Tan1	Tan2	Tan1.Tan2	1.89193	15.8328	0.00019357	0.000949176	0.00890931	0.00198464	0.000625593	2.62682e-05	0.000174848	0.00990163
2	1	9017	Tan1	Tan2	Tan1.Tan2	2.34881	26.2066	0.00133748	0.00698939	0.0186599	0.0127492	0.0013159	0.000611002	0.000647165	0.0138062
2	1	9023	Tan1	Tan2	Tan1.Tan2	4.04102	118.076	0.00069031	0.000901462	0.00737769	0.00310639	0.00200621	6.06707e-05	0.000526173	0.00787385
2	1	9031	Tan1	Tan2	Tan1.Tan2	4.46221	105.005	0.00135905	0.0193502	0.0159203	0.00936233	0.00129433	0.000328275	0.000906032	0.0201053
2	1	9052	Tan1	Tan2	Tan1.Tan2	3.64531	51.8155	0.000970748	0.0010553	0.00988006	0.00217879	0.0028691	0.000113997	0.000459073	0.0164164
2	1	9056	Tan1	Tan2	Tan1.Tan2	1.82366	20.1302	0.00114333	0.0112175	0.0120588	0.00854258	0.00276124	0.000238568	0.000474588	0.0190914
2	1	9144	Tan1	Tan2	Tan1.Tan2	2.26112	35.2972	0.000458022	0.000302059	0.00543619	0.00112175	0.00202778	0.00796524	0.000841315	0.00862887
2	1	9163	Tan1	Tan2	Tan1.Tan2	2.37075	17.9684	0.00099232	0.00543619	0.0120373	0.00925447	0.000819743	0.000149705	0.000412547	0.0113254
2	1	9167	Tan1	Tan2	Tan1.Tan2	5.03595	71.4136	0.000819743	0.000841315	0.00877988	0.00122961	0.00245923	0.000371141	0.00161791	0.0210113
2	1	9175	Tan1	Tan2	Tan1.Tan2	2.39309	12.4848	0.00103546	0.00770127	0.0119941	0.0044223	0.00416343	0.00141102	0.00041499	0.0105704
2	1	9177	Tan1	Tan2	Tan1.Tan2	0.279335	5.60748	0.000141025	0.000270424	0.00994478	0.00222193	0.000711882	3.07985e-05	0.000755026	0.0125119
2	1	9211	Tan1	Tan2	Tan1.Tan2	3.1698	50.2985	0.000560877	0.000436543	0.00692467	0.00112175	0.00245923	0.00383038	0.00100026	0.00580292
2	1	9212	Tan1	Tan2	Tan1.Tan2	4.47471	82.3939	0.000711882	0.00099232	0.00606178	0.00104425	0.00355941	1.99947e-05	0.000784141	0.0141514
2	1	9216	Tan1	Tan2	Tan1.Tan2	5.00287	87.1898	0.00157477	0.00230822	0.0132669	0.0125119	0.000970748	3.71391e-05	0.000462981	0.0116921
2	1	9226	Tan1	Tan2	Tan1.Tan2	4.86411	60.2146	0.00163949	0.000798171	0.015683	0.00446544	0.00235137	0.00105704	0.00282596	0.0187247
2	1	9234	Tan1	Tan2	Tan1.Tan2	1.95192	35.2523	0.00112175	0.00468116	0.0205367	0.00679524	0.00875831	0.00330054	0.00239451	0.0162654
2	1	9248	Tan1	Tan2	Tan1.Tan2	2.19687	33.2798	0.00157477	0.00487531	0.0140219	0.00837001	0.00222524	0.000358069	0.00235137	0.0157693
2	1	9252	Tan1	Tan2	Tan1.Tan2	4.40043	95.0324	0.000819743	0.00142376	0.0119294	0.00271809	0.0023298	0.00275222	0.00118647	0.0100095
2	1	9258	Tan1	Tan2	Tan1.Tan2	2.4127	26.8392	0.000776598	0.00295142	0.00735611	0.00431444	0.00371042	0.0010911	0.000949176	0.00509103
2	2	8775	Tan1	tan2-c	Tan1.tan2-c	-0.648267	7.52479	0.000237037	0.000381456	0.0051989	0.00310639	0.00105704	3.74948e-05	0.000450175	0.00925447
2	2	8786	Tan1	tan2-c	Tan1.tan2-c	-1.26798	5.65807	0.000906032	0.000733454	0.0116921	0.00638537	0.00142376	0.00112995	0.00114333	0.00951333
2	2	8798	Tan1	tan2-c	Tan1.tan2-c	-0.216002	4.78322	0.000730999	0.0138412	0.0206877	0.00890931	0.00371042	2.51162e-05	0.00302011	0.00742083
2	2	8800	Tan1	tan2-c	Tan1.tan2-c	-0.386666	5.87974	0.000241545	0.000114595	0.00435758	0.00125119	0.0023298	0.000612553	0.000625194	0.0129865
2	2	8801	Tan1	tan2-c	Tan1.tan2-c	-0.52786	3.61714	0.000442031	0.000320325	0.00817586	0.00414926	0.00258866	0.000219544	0.00127276	0.0152515
2	2	8835	Tan1	tan2-c	Tan1.tan2-c	-0.439946	6.0039	0.0011649	0.00132498	0.00912503	0.00200621	0.00114333	0.000416521	0.000409871	0.0103331
2	2	8878	Tan1	tan2-c	Tan1.tan2-c	0.0289053	6.00984	0.00069031	0.000841315	0.00906032	0.00319268	0.00222193	2.91531e-05	0.00069031	0.0119078
2	2	8885	Tan1	tan2-c	Tan1.tan2-c	-0.803739	4.16651	4.30549e-05	0.000819743	0.00832686	0.00174735	0.000733454	0.000806295	0.000927604	0.012555
2	2	8894	Tan1	tan2-c	Tan1.tan2-c	2.23866	7.23954	0.000559685	0.00105704	0.0143024	0.00750712	0.00179049	0.0006983	0.000625593	0.0106135
2	2	8899	Tan1	tan2-c	Tan1.tan2-c	-0.458807	4.61875	0.0001487	2.58433e-05	0.00621279	0.000776598	0.00144534	3.69257e-05	0.00061961	0.00972905
2	2	8904	Tan1	tan2-c	Tan1.tan2-c	-1.32849	5.65964	0.000622887	0.000725707	0.0097722	0.00103291	0.00120804	3.12783e-05	0.000668738	0.00972905
2	2	8913	Tan1	tan2-c	Tan1.tan2-c	-0.91927	5.48004	0.000798171	0.00136657	0.0104841	0.00245289	0.00110018	0.0028415	0.000345155	0.0120157
2	2	8917	Tan1	tan2-c	Tan1.tan2-c	-1.16297	7.34615	0.000289028	0.000819743	0.00774441	0.000647165	0.00157477	0.00207093	0.000148743	0.00983691
2	2	8919	Tan1	tan2-c	Tan1.tan2-c	-0.771197	5.93969	0.000906032	0.000755026	0.0152515	0.00619122	0.0019415	0.00187678	0.000855791	0.0171715
2	2	8930	Tan1	tan2-c	Tan1.tan2-c	-1.10779	6.92914	0.000798171	4.47676e-05	0.00830529	0.00211407	0.000968866	0.000162171	0.000560877	0.0123609
2	2	8934	Tan1	tan2-c	Tan1.tan2-c	-0.935643	5.68193	0.000462746	0.000438483	0.0105704	0.00166106	0.00146065	0.00223182	0.000517732	0.00888774
2	2	8935	Tan1	tan2-c	Tan1.tan2-c	-0.677016	8.30737	0.000539305	2.77109e-05	0.00722668	0.000901679	0.000884459	0.000256428	0.000625593	0.0142376
2	2	8937	Tan1	tan2-c	Tan1.tan2-c	-0.920376	6.04327	0.000539305	0.000883803	0.0116921	0.00668738	0.00256709	0.00332212	0.00144534	0.0132453
2	2	8945	Tan1	tan2-c	Tan1.tan2-c	-1.01137	3.80991	0.000560877	0.000439385	0.00668738	0.00122961	0.00135905	0.00123536	0.000353517	0.0179265
2	2	8957	Tan1	tan2-c	Tan1.tan2-c	0.0313165	4.9052	0.000827694	0.000730169	0.0196307	0.00502632	0.00110018	0.00119063	0.000258866	0.0114764
2	2	8961	Tan1	tan2-c	Tan1.tan2-c	-1.63583	5.49336	0.000474588	0.00101389	0.00847787	0.00198464	0.00196307	0.000493961	0.000733454	0.00778756
2	2	9002	Tan1	tan2-c	Tan1.tan2-c	-0.778118	6.33437	0.000474287	0.000266028	0.00582449	0.00313359	0.00129433	2.79022e-05	0.000332935	0.00955648
2	2	9005	Tan1	tan2-c	Tan1.tan2-c	-0.261822	7.46578	0.000906032	0.00049616	0.0109155	0.00640694	0.00345155	0.00138471	0.00213565	0.0103546
2	2	9008	Tan1	tan2-c	Tan1.tan2-c	0.434621	3.26498	0.000258866	0.000274531	0.00489688	0.000968178	0.00148848	0.000781	0.000647165	0.0114333
2	2	9020	Tan1	tan2-c	Tan1.tan2-c	-0.620863	5.23648	0.000740457	0.000105508	0.0109371	0.00179049	0.00176892	3.20286e-05	0.000604021	0.0137415
2	2	9021	Tan1	tan2-c	Tan1.tan2-c	-1.1751	5.23726	0.000776598	0.000497022	0.0130943	0.00368884	0.00123839	0.00291654	0.000536326	0.0132885
2	2	9026	Tan1	tan2-c	Tan1.tan2-c	-0.383744	4.32044	0.00052687	3.79264e-05	0.00621279	0.000333153	0.00254552	0.00050194	0.000883525	0.0127707
2	2	9034	Tan1	tan2-c	Tan1.tan2-c	-1.41745	5.13608	0.00118647	0.00191992	0.0149711	0.0133168	0.00189835	0.000250036	0.000668738	0.0147769
2	2	9035	Tan1	tan2-c	Tan1.tan2-c	-0.461172	7.46578	0.00047153	0.000346422	0.00276124	0.000841315	0.0032574	0.00142376	0.00349469	0.0173009
2	2	9038	Tan1	tan2-c	Tan1.tan2-c	-1.61742	4.96304	0.000878553	0.00151005	0.0141945	0.00955648	0.00217879	0.00117872	0.0011458	0.0139788
2	2	9145	Tan1	tan2-c	Tan1.tan2-c	-0.718226	7.5082	0.000755026	2.35752e-05	0.0136552	0.00299853	0.00220036	2.85956e-05	0.000323195	0.00793856
2	2	9148	Tan1	tan2-c	Tan1.tan2-c	-1.46968	7.49971	0.000431444	0.000703124	0.0132885	0.00632065	0.00122961	0.00675767	0.000711882	0.00955648
2	2	9159	Tan1	tan2-c	Tan1.tan2-c	-0.920168	5.93692	0.0013159	0.00871516	0.0147769	0.0154241	0.00146691	0.00135525	0.00070483	0.0159418
2	2	9160	Tan1	tan2-c	Tan1.tan2-c	-0.711321	4.72853	0.000582449	0.00127852	0.0111312	0.00228665	0.00179049	0.00149162	0.000569368	0.00759341
2	2	9194	Tan1	tan2-c	Tan1.tan2-c	-1.01253	5.72276	0.000884459	0.00181206	0.0151437	0.00653637	0.00336526	0.018602	0.00302011	0.0123393
2	2	9203	Tan1	tan2-c	Tan1.tan2-c	-0.691613	6.42638	0.000276854	0.000283101	0.0121667	0.00832686	0.00420658	0.000970748	0.000862887	0.0145828
2	2	9207	Tan1	tan2-c	Tan1.tan2-c	-0.180824	5.68417	0.000213975	0.000329083	0.00722668	0.0017042	0.0032574	0.00261023	0.000733454	0.0112823
2	2	9209	Tan1	tan2-c	Tan1.tan2-c	-0.170309	8.63204	0.000634328	0.00263181	0.0142808	0.00947019	0.00138062	5.50148e-05	0.000237631	0.00886617
2	2	9214	Tan1	tan2-c	Tan1.tan2-c	-0.874066	7.0604	0.000625593	0.00102717	0.0122099	0.00435758	0.00134276	0.00011452	0.00103546	0.016136
2	2	9224	Tan1	tan2-c	Tan1.tan2-c	-0.323577	7.67142	0.000270997	0.000358902	0.00921132	0.00375356	0.00228665	0.000702424	0.000501305	0.00975063
2	2	9236	Tan1	tan2-c	Tan1.tan2-c	-0.200294	6.65105	0.000927604	4.29064e-05	0.0127923	0.00285751	0.00120804	0.000114801	0.000526991	0.0156398
2	2	9247	Tan1	tan2-c	Tan1.tan2-c	-0.809308	1.91288	0.000733454	0.000641903	0.00964276	0.00903874	0.000870573	0.000774787	0.000563755	0.0191561
2	2	9253	Tan1	tan2-c	Tan1.tan2-c	-0.375528	6.1412	0.00107861	0.000452011	0.00877988	0.00251231	0.00235137	0.00312797	0.00105704	0.010894
2	2	9270	Tan1	tan2-c	Tan1.tan2-c	-0.955817	5.81516	0.00112175	0.000980402	0.0133748	0.00582449	0.000776598	0.00290366	0.000970748	0.0156614
2	2	9271	Tan1	tan2-c	Tan1.tan2-c	-0.621804	5.49877	0.000560877	0.0002643	0.00800328	0.000841315	0.0044223	0.000113556	0.000694265	0.0123824
1	1	8759	tan1-b	Tan2	tan1-b.Tan2	-1.12912	5.23174	0.000361753	0.000746082	0.00936233	0.00584606	0.00163949	0.00616872	0.000719142	0.0099232
1	1	8764	tan1-b	Tan2	tan1-b.Tan2	-0.967879	4.14754	0.000604021	0.000343282	0.00882302	0.000841315	0.00258866	0.000574976	0.000380996	0.00798171
1	1	8765	tan1-b	Tan2	tan1-b.Tan2	-1.07562	7.63205	0.000129615	3.71616e-05	0.00390456	0.00110018	0.00437915	0.000395023	0.00144534	0.0138925
1	1	8773	tan1-b	Tan2	tan1-b.Tan2	-0.89035	5.93123	0.00112175	3.47793e-05	0.0110018	0.00431114	0.00125119	3.68079e-05	0.000390568	0.00975063
1	1	8777	tan1-b	Tan2	tan1-b.Tan2	-0.181511	6.25834	0.00115258	0.00707045	0.0151221	0.0244489	0.00153162	0.000263855	0.0013969	0.0141514
1	1	8788	tan1-b	Tan2	tan1-b.Tan2	-0.691404	5.49165	0.000550228	0.00038612	0.00832686	0.00181206	0.00241608	3.43296e-05	0.000297541	0.0131159
1	1	8789	tan1-b	Tan2	tan1-b.Tan2	-1.04302	7.7705	0.00161791	0.00183318	0.0180991	0.00875831	0.00265338	0.000251596	0.000369222	0.0127707
1	1	8804	tan1-b	Tan2	tan1-b.Tan2	-1.0235	5.94929	0.000647165	0.000829276	0.0104409	0.00910346	0.00235137	0.00249011	0.000145227	0.00968591
1	1	8807	tan1-b	Tan2	tan1-b.Tan2	-0.525793	4.78838	0.000711882	0.000799914	0.0109802	0.00368884	0.00148848	0.000215502	0.000350772	0.0109802
1	1	8812	tan1-b	Tan2	tan1-b.Tan2	-0.644914	4.05763	0.000301316	0.000142246	0.00302011	0.000264865	0.00263181	0.000798675	0.00068082	0.0141298
1	1	8819	tan1-b	Tan2	tan1-b.Tan2	-1.08789	4.19333	0.000280438	0.00204904	0.00623436	0.00145524	0.00362413	0.00258866	0.000389456	0.0124687
1	1	8820	tan1-b	Tan2	tan1-b.Tan2	-0.518884	6.91632	0.00069031	0.000226496	0.0119078	0.00664423	0.00120804	0.00337682	0.000500335	0.0163733
1	1	8824	tan1-b	Tan2	tan1-b.Tan2	-1.42021	6.0913	0.000114909	0.000196563	0.00412029	0.000242449	0.00420658	0.000515913	0.000559413	0.0123177
1	1	8827	tan1-b	Tan2	tan1-b.Tan2	-0.64681	4.69909	0.000936795	0.0024808	0.0165027	0.0150142	0.00366727	0.000243992	0.0028691	0.0116705
1	1	8838	tan1-b	Tan2	tan1-b.Tan2	-0.521819	4.5181	0.000140542	0.000625593	0.00560877	0.00162266	0.00168263	0.00399042	0.000191613	0.0099232
1	1	8839	tan1-b	Tan2	tan1-b.Tan2	2.40838	16.009	0.000733454	0.000340343	0.0124256	0.0011649	0.00571663	0.000442059	0.00625593	0.0112607
1	1	8841	tan1-b	Tan2	tan1-b.Tan2	-1.4239	5.32314	0.000237294	0.000384098	0.00843472	0.00189835	0.00112175	0.00245923	0.00110018	0.0126844
1	1	8844	tan1-b	Tan2	tan1-b.Tan2	-0.0526032	7.78816	0.000970748	0.00422815	0.0135042	0.0201053	0.00161791	0.000833564	0.0008615	0.0147985
1	1	8862	tan1-b	Tan2	tan1-b.Tan2	-0.55888	6.74681	0.000211288	0.000134543	0.00616964	0.000582449	0.00431444	0.00629908	0.00220036	0.0158771
1	1	8864	tan1-b	Tan2	tan1-b.Tan2	-0.812223	5.80435	0.000841315	0.000557712	0.0104409	0.00541462	0.00353784	0.000314083	0.000335732	0.0136336
1	1	8865	tan1-b	Tan2	tan1-b.Tan2	1.99892	5.16788	0.000668738	0.000477869	0.00554405	0.000537184	0.00407714	0.00101389	0.000560877	0.0122746
1	1	8868	tan1-b	Tan2	tan1-b.Tan2	-1.07475	5.59845	5.82778e-05	0.000187641	0.00295539	0.000222973	0.0044223	0.000311953	0.000906032	0.016136
1	1	8871	tan1-b	Tan2	tan1-b.Tan2	-0.804109	6.50577	0.000244441	0.000154945	0.00832686	0.00339158	0.00220036	0.00192476	0.000139022	0.0107861
1	1	8872	tan1-b	Tan2	tan1-b.Tan2	-0.140569	4.87607	0.000711114	0.00124365	0.0109802	0.00655121	0.00148848	0.00247314	0.000300984	0.0151652
1	1	8874	tan1-b	Tan2	tan1-b.Tan2	0.863145	0.0901408	0.00030991	0.000731177	0.00608335	0.00115121	0.00127276	0.000388299	0.000767363	0.0099232
1	1	8876	tan1-b	Tan2	tan1-b.Tan2	1.50141	4.87285	0.00041935	0.000263935	0.00608335	0.000798171	0.000694182	3.44083e-05	0.000257345	0.0109371
1	1	8880	tan1-b	Tan2	tan1-b.Tan2	-0.0317504	9.43218	0.000474588	0.000176828	0.00673052	0.00200621	0.00144534	0.000401813	0.000776598	0.0106998
1	1	8883	tan1-b	Tan2	tan1-b.Tan2	-0.863716	2.4929	0.000345155	0.000178865	0.00468116	0.00161736	0.0028691	0.00329051	0.000387256	0.0120157
1	1	8884	tan1-b	Tan2	tan1-b.Tan2	2.66404	28.1748	0.00122961	0.00808957	0.0185089	0.0126844	0.0017042	0.00239794	0.000426131	0.0181422
1	1	8887	tan1-b	Tan2	tan1-b.Tan2	-0.651427	6.19779	0.000382479	3.4102e-05	0.00951333	0.00237294	0.00142376	0.000768779	0.000258866	0.0102036
1	1	8888	tan1-b	Tan2	tan1-b.Tan2	-1.60268	4.77013	0.000492779	0.000425893	0.00681681	0.000350968	0.00122961	0.000518238	0.000239896	0.0131375
1	1	8901	tan1-b	Tan2	tan1-b.Tan2	2.67032	41.8755	0.00105704	0.0104695	0.0100526	0.00099232	0.00276124	0.00395512	0.00628675	0.0230391
1	1	8902	tan1-b	Tan2	tan1-b.Tan2	-1.48735	8.59192	0.00151005	0.000490329	0.0159203	0.00722668	0.00368884	4.07101e-05	0.00141563	0.00931918
1	1	8908	tan1-b	Tan2	tan1-b.Tan2	-1.64262	4.07029	0.000647165	0.000491697	0.0150142	0.00494003	0.00189835	0.000560877	0.00144534	0.0186815
1	1	8911	tan1-b	Tan2	tan1-b.Tan2	-1.25635	5.56623	0.000604021	0.000745596	0.00908189	0.00646519	0.00135155	0.000456004	0.00045748	0.0099232
1	1	8925	tan1-b	Tan2	tan1-b.Tan2	-0.223471	6.4365	0.000378488	2.65225e-05	0.00474588	0.000933465	0.00101389	3.46713e-05	0.000312893	0.0103546
1	1	8931	tan1-b	Tan2	tan1-b.Tan2	3.38441	4.70096	0.000903264	0.000356609	0.0133532	0.00716148	0.00148848	0.000102119	0.000258866	0.0097722
1	1	8940	tan1-b	Tan2	tan1-b.Tan2	-1.80212	5.55647	0.000517732	0.000926383	0.0103762	0.00279851	0.0048106	0.00353784	0.00174735	0.0119294
1	1	8942	tan1-b	Tan2	tan1-b.Tan2	-0.91535	5.97582	0.00156338	0.00821169	0.0151868	0.019264	0.00252395	0.00274338	0.000516129	0.00780913
1	1	8964	tan1-b	Tan2	tan1-b.Tan2	2.13603	4.43905	5.78038e-05	0.000309428	0.00416343	0.000539305	0.00102242	0.0013159	0.000533166	0.00752869
1	1	8966	tan1-b	Tan2	tan1-b.Tan2	-1.60576	5.57904	0.000884459	5.38156e-05	0.0104625	0.00537147	0.00188315	7.24183e-05	0.00129433	0.0134395
1	1	8967	tan1-b	Tan2	tan1-b.Tan2	-0.85135	5.63115	0.000711882	0.00072338	0.0109155	0.00304168	0.00506946	0.0449996	0.00267495	0.00780913
1	1	8969	tan1-b	Tan2	tan1-b.Tan2	-1.88313	5.19999	0.000539305	0.00320398	0.00921132	0.00241608	0.0013159	4.56154e-05	0.000308501	0.0147769
1	1	8978	tan1-b	Tan2	tan1-b.Tan2	-0.838034	6.61415	0.0012851	0.0251963	0.0117784	0.00245923	0.00312797	0.00023463	0.000323583	0.00918975
1	1	8979	tan1-b	Tan2	tan1-b.Tan2	-0.519275	6.47748	0.00114333	0.00408053	0.0109155	0.00843472	0.00198464	0.00127276	4.00059e-05	0.0099232
1	1	8986	tan1-b	Tan2	tan1-b.Tan2	-0.960191	6.10836	0.000144078	0.00036989	0.00582449	0.000869067	0.0017042	0.00213565	0.000241929	0.0109155
1	1	8990	tan1-b	Tan2	tan1-b.Tan2	-1.49926	5.35694	0.000314516	0.000482751	0.00500475	0.00107861	0.00258866	0.000193055	0.00053866	0.0106567
1	1	8992	tan1-b	Tan2	tan1-b.Tan2	-0.558144	7.70065	0.000733454	0.000841182	0.0149279	0.0119168	0.00282596	0.000264672	0.000438365	0.00880145
1	1	9003	tan1-b	Tan2	tan1-b.Tan2	3.43368	53.1489	0.000776598	0.000766565	0.00804642	0.00148848	0.00250237	0.00109364	0.000761571	0.0100526
1	1	9004	tan1-b	Tan2	tan1-b.Tan2	0.714567	5.25904	0.000517732	3.63032e-05	0.00463802	0.000560877	0.00099232	0.00391054	0.000135384	0.00890931
1	1	9006	tan1-b	Tan2	tan1-b.Tan2	-1.50438	7.66873	0.000517732	0.00017614	0.00778756	0.00284753	0.00377513	4.20245e-05	0.000949176	0.012102
1	1	9027	tan1-b	Tan2	tan1-b.Tan2	-0.470612	4.91612	0.000862887	0.000371067	0.00811114	0.00843472	0.00213565	0.00172652	0.000797866	0.0158771
1	1	9028	tan1-b	Tan2	tan1-b.Tan2	-0.476797	22.7223	0.0013159	0.00105704	0.0132885	0.00444387	0.00118647	0.000223164	0.000299697	0.0111097
1	1	9029	tan1-b	Tan2	tan1-b.Tan2	-0.934712	7.05101	0.000927604	0.000868876	0.00959962	0.00261023	0.00265338	3.99678e-05	0.000733454	0.0140651
1	1	9036	tan1-b	Tan2	tan1-b.Tan2	-0.503881	5.75869	0.000702898	0.00120006	0.0108077	0.00289067	0.00138062	0.00101389	0.000647165	0.0166753
1	1	9037	tan1-b	Tan2	tan1-b.Tan2	-0.702469	4.61017	0.000733454	0.000637096	0.00688153	0.00150268	0.0017042	4.68754e-05	0.000582449	0.0168694
1	1	9043	tan1-b	Tan2	tan1-b.Tan2	-1.19943	7.03447	0.000285155	0.000522755	0.00761498	0.00437915	0.00437915	0.00257548	0.00265338	0.0115627
1	1	9046	tan1-b	Tan2	tan1-b.Tan2	-1.72612	6.51684	0.000453016	0.000308446	0.00936233	0.00291224	0.00146691	0.0016358	0.000425168	0.012404
1	1	9054	tan1-b	Tan2	tan1-b.Tan2	-0.865623	8.27727	0.000711882	0.000789192	0.0138062	0.00637161	0.004185	0.000314888	0.00210005	0.0102684
1	1	9057	tan1-b	Tan2	tan1-b.Tan2	-0.193424	4.9837	0.00010709	0.000391791	0.0053499	0.00287741	0.00217879	0.00295799	0.000252484	0.0103115
1	1	9060	tan1-b	Tan2	tan1-b.Tan2	-0.888376	5.90572	0.000303591	0.000711882	0.0048106	0.000249022	0.00235137	0.000325888	0.00065423	0.0154025
1	1	9146	tan1-b	Tan2	tan1-b.Tan2	0.231506	6.13543	0.000199611	0.00102789	0.0091466	0.00319268	0.00125119	0.000194651	0.00127276	0.0119294
1	1	9147	tan1-b	Tan2	tan1-b.Tan2	-1.01525	4.67214	0.000590844	0.000884459	0.0089956	0.00748555	0.00127276	0.00149862	2.35886e-05	0.0116705
1	1	9149	tan1-b	Tan2	tan1-b.Tan2	-0.815831	7.62624	0.000274134	0.000439858	0.00947019	0.00122961	0.00237294	0.000245128	0.000323583	0.0146475
1	1	9150	tan1-b	Tan2	tan1-b.Tan2	-0.314133	6.05215	0.000286877	0.000610405	0.00433601	0.000517732	0.00330054	0.00694398	0.000668738	0.0138278
1	1	9156	tan1-b	Tan2	tan1-b.Tan2	-1.41253	3.77907	0.000314712	2.98777e-05	0.0069031	0.00101389	0.00168263	0.000508469	0.000604021	0.0151652
1	1	9158	tan1-b	Tan2	tan1-b.Tan2	-0.688238	4.6891	0.000336234	0.000492864	0.0109371	0.00127276	0.00608335	0.00551776	0.00429286	0.015381
1	1	9168	tan1-b	Tan2	tan1-b.Tan2	-1.86861	4.18105	0.00049616	0.000588069	0.00837001	0.0024808	0.00450859	3.0648e-05	0.000327712	0.0322504
1	1	9169	tan1-b	Tan2	tan1-b.Tan2	-0.663991	5.61595	0.000305058	3.01064e-05	0.00567348	0.000418718	0.00591078	0.000317299	0.00200621	0.0114333
1	1	9171	tan1-b	Tan2	tan1-b.Tan2	-1.95908	5.43239	0.000625593	0.000440067	0.0122746	0.00278915	0.00125119	4.00965e-05	0.000453016	0.0103546
1	1	9172	tan1-b	Tan2	tan1-b.Tan2	-1.26864	5.29196	0.000453016	0.000230393	0.0070541	0.000589303	0.00261023	0.00144534	0.00110018	0.0201484
1	1	9173	tan1-b	Tan2	tan1-b.Tan2	-1.44964	5.68479	0.00107379	0.00104695	0.0124903	0.00815428	0.00213565	0.000647468	0.0003524	0.0105704
1	1	9174	tan1-b	Tan2	tan1-b.Tan2	-2.03377	6.70751	0.000872897	0.00147817	0.0132022	0.00757184	0.00265338	0.0023298	0.00140219	0.0164164
1	1	9180	tan1-b	Tan2	tan1-b.Tan2	-1.08685	9.46988	0.00043495	0.000275398	0.0106567	0.00458786	0.0015532	0.000313921	0.000234635	0.0115843
1	1	9181	tan1-b	Tan2	tan1-b.Tan2	-0.182327	5.74621	0.00153162	0.00191992	0.0170205	0.0103115	0.00198464	0.000244348	0.000345155	0.0108724
1	1	9182	tan1-b	Tan2	tan1-b.Tan2	-0.0788952	6.60814	0.00027578	0.000654373	0.00670895	0.000385366	0.00105704	3.45449e-05	0.00072378	0.0146259
1	1	9188	tan1-b	Tan2	tan1-b.Tan2	-1.25175	7.33145	0.000558245	0.000527539	0.0116058	0.00584606	0.00174735	0.000574506	0.00099232	0.0133748
1	1	9191	tan1-b	Tan2	tan1-b.Tan2	-0.580882	5.19211	0.000642592	0.00365907	0.00811114	0.0273198	0.00342998	0.000754817	0.000798171	0.00746397
1	1	9204	tan1-b	Tan2	tan1-b.Tan2	-1.42555	5.46995	0.000557021	0.000230829	0.0106135	0.00317111	0.00202778	0.000206493	0.000604021	0.0123393
1	1	9205	tan1-b	Tan2	tan1-b.Tan2	-2.48888	5.90826	0.000841315	0.00028661	0.0104194	0.00237294	0.00230822	0.000704877	0.000464082	0.0145828
1	1	9210	tan1-b	Tan2	tan1-b.Tan2	-1.27899	6.19513	0.00038973	0.00016374	0.00422815	0.000452586	0.00373199	0.00336526	0.00254552	0.0113901
1	1	9218	tan1-b	Tan2	tan1-b.Tan2	0.0825346	5.99885	0.000711882	0.000652454	0.0128139	0.00245923	0.00101389	0.000146913	0.000513956	0.0128354
1	1	9221	tan1-b	Tan2	tan1-b.Tan2	-0.476873	6.19802	0.00127276	0.000819743	0.0132669	0.00506946	0.000700114	0.000683887	0.000539305	0.013159
1	1	9227	tan1-b	Tan2	tan1-b.Tan2	-1.01664	6.10836	0.000560877	0.000420151	0.0109371	0.00280438	0.000755026	0.000632553	0.000798171	0.008068
1	1	9238	tan1-b	Tan2	tan1-b.Tan2	-1.58211	6.10836	0.000647165	0.000598262	0.00819743	0.00224855	0.0024808	0.000711882	0.000582378	0.0114548
1	1	9239	tan1-b	Tan2	tan1-b.Tan2	-1.26755	6.35363	0.000458223	0.000465058	0.00912503	0.00282596	0.00112175	0.000305327	0.000667472	0.0136983
1	1	9240	tan1-b	Tan2	tan1-b.Tan2	-0.93796	6.58618	0.000164579	0.000766066	0.00856416	0.00181206	0.00299853	0.000210842	0.000513737	0.0151437
1	1	9251	tan1-b	Tan2	tan1-b.Tan2	-0.786091	5.65477	0.000927604	0.00148848	0.012555	0.00599707	0.00245923	0.000467236	0.000649441	0.0164164
1	1	9256	tan1-b	Tan2	tan1-b.Tan2	-1.33974	6.40867	0.000378676	0.000239522	0.00698939	0.00317111	0.00163949	0.00142743	1.7496e-05	0.0107214
1	2	8769	tan1-b	tan2-c	tan1-b.tan2-c	-1.32903	6.03733	6.45337e-05	0.000211369	0.00388299	7.37436e-05	0.00166106	0.00168295	0.000366727	0.00998792
1	2	8772	tan1-b	tan2-c	tan1-b.tan2-c	-1.33579	5.84777	0.000776598	0.00219104	0.0108724	0.00491379	0.00295539	0.000995473	0.00222193	0.0195444
1	2	8774	tan1-b	tan2-c	tan1-b.tan2-c	-0.694122	5.34482	0.00069031	0.000147904	0.00906032	0.00388299	0.00161791	0.00196889	0.00110018	0.01674
1	2	8790	tan1-b	tan2-c	tan1-b.tan2-c	-1.07391	6.75762	0.000378954	2.82054e-05	0.00342998	0.000425268	0.00199625	0.000621971	0.000632149	0.0218095
1	2	8794	tan1-b	tan2-c	tan1-b.tan2-c	-1.37402	4.69975	0.000844233	0.000695099	0.0209034	0.00560877	0.00211407	0.000859943	0.000470732	0.0157693
1	2	8803	tan1-b	tan2-c	tan1-b.tan2-c	-0.505491	3.28416	0.000375386	2.65205e-05	0.00839158	0.00133748	0.00120804	0.000161725	0.000327797	0.0149064
1	2	8814	tan1-b	tan2-c	tan1-b.tan2-c	-1.09788	5.00923	0.000453016	0.000823154	0.00675209	0.00207093	0.00204936	0.000957005	0.00050818	0.0153378
1	2	8822	tan1-b	tan2-c	tan1-b.tan2-c	-1.05069	7.04015	0.000582449	0.000682899	0.0124256	0.00625305	0.00282596	0.000409871	0.00222193	0.0119294
1	2	8840	tan1-b	tan2-c	tan1-b.tan2-c	-0.454294	9.60184	0.000970748	0.00140656	0.0109802	0.003501	0.00172577	0.000725549	0.000819743	0.0129433
1	2	8847	tan1-b	tan2-c	tan1-b.tan2-c	-1.59802	5.66954	0.00060966	0.000793119	0.0104841	0.0103762	0.00265338	0.00389182	0.00191992	0.0113685
1	2	8854	tan1-b	tan2-c	tan1-b.tan2-c	-0.797916	5.47869	0.000539305	0.00014325	0.00392614	0.000544361	0.00161791	0.00243766	0.0013159	0.00888774
1	2	8855	tan1-b	tan2-c	tan1-b.tan2-c	0.214757	7.10953	0.00012193	2.43626e-05	0.00563034	0.000412804	0.0016012	3.01768e-05	0.00107861	0.0153594
1	2	8857	tan1-b	tan2-c	tan1-b.tan2-c	-1.14274	6.32083	0.000625593	0.000697678	0.00966434	0.00267495	0.00104181	0.0007467	0.000189486	0.012404
1	2	8858	tan1-b	tan2-c	tan1-b.tan2-c	-0.932749	4.85102	0.00101389	0.00200621	0.016287	0.00778756	0.00239451	0.00188415	0.000798171	0.0124471
1	2	8859	tan1-b	tan2-c	tan1-b.tan2-c	-1.23728	7.64552	0.000237294	0.000542065	0.00511261	0.000798171	0.00280438	0.000262375	0.000776598	0.0184011
1	2	8861	tan1-b	tan2-c	tan1-b.tan2-c	-0.396557	5.38373	0.000906032	0.00011391	0.00934075	0.00297696	0.00120804	0.00449253	0.000431444	0.0136983
1	2	8869	tan1-b	tan2-c	tan1-b.tan2-c	-1.80371	6.65057	0.000455957	0.000467922	0.00772284	0.00148848	0.00323583	0.000961319	0.000749828	0.0117568
1	2	8889	tan1-b	tan2-c	tan1-b.tan2-c	-1.43609	8.0988	0.000852425	0.00146473	0.0121451	0.0132174	0.00318028	4.23426e-05	0.00107861	0.0147985
1	2	8892	tan1-b	tan2-c	tan1-b.tan2-c	-1.19541	7.25024	0.000366727	0.000309677	0.012102	0.0036457	0.0048106	0.00774441	0.00191992	0.0116058
1	2	8896	tan1-b	tan2-c	tan1-b.tan2-c	-0.918804	6.07998	0.000409871	4.4283e-05	0.00983691	0.00125119	0.00226508	0.00759341	0.000523688	0.00970748
1	2	8898	tan1-b	tan2-c	tan1-b.tan2-c	-1.07644	6.31473	0.000395063	0.000524807	0.00621279	0.00491846	0.00220036	0.00138554	2.85396e-05	0.011649
1	2	8905	tan1-b	tan2-c	tan1-b.tan2-c	-1.30743	5.61309	0.000206547	0.000284135	0.00657952	0.00051641	0.0023298	0.000459969	0.000755026	0.0133748
1	2	8909	tan1-b	tan2-c	tan1-b.tan2-c	-0.417219	5.28907	0.000604021	4.54849e-05	0.0113685	0.00267324	0.00502632	0.000469995	0.00127276	0.016589
1	2	8920	tan1-b	tan2-c	tan1-b.tan2-c	-1.12581	0.963484	0.000453016	3.90005e-05	0.00623436	0.000668738	0.000927604	0.000243638	0.000264606	0.0113901
1	2	8924	tan1-b	tan2-c	tan1-b.tan2-c	-0.82132	7.73293	0.000819743	0.00106835	0.0184226	0.0111528	0.00146691	0.000404234	0.000625564	0.015381
1	2	8928	tan1-b	tan2-c	tan1-b.tan2-c	-0.411684	7.65421	0.000421019	0.000742899	0.00962119	0.00588921	0.00310639	0.000354436	0.00222193	0.0141514
1	2	8939	tan1-b	tan2-c	tan1-b.tan2-c	0.0225552	5.73547	0.0011649	0.00130164	0.0106782	0.00349469	0.00351627	0.00014681	0.000884459	0.0138925
1	2	8941	tan1-b	tan2-c	tan1-b.tan2-c	-0.975283	7.35166	0.000927604	0.00033071	0.0118	0.00465959	0.00166106	0.000388217	0.000310084	0.00931918
1	2	8948	tan1-b	tan2-c	tan1-b.tan2-c	-1.62163	3.27329	0.000431444	0.00110018	0.00975063	0.00694618	0.00159634	0.000210197	0.0022026	0.0113254
1	2	8955	tan1-b	tan2-c	tan1-b.tan2-c	3.28489	4.46282	0.000582449	0.000238608	0.0074424	0.00235137	0.00304168	0.0037967	0.000714406	0.0169989
1	2	8958	tan1-b	tan2-c	tan1-b.tan2-c	-0.640041	5.31011	0.000819743	0.000755026	0.011649	0.00947019	0.0017121	2.40628e-05	0.00173236	0.00947019
1	2	8959	tan1-b	tan2-c	tan1-b.tan2-c	-0.976267	4.94486	0.000776598	0.000431444	0.00785227	0.00435758	0.00282596	0.000893774	0.00327897	0.00895245
1	2	8960	tan1-b	tan2-c	tan1-b.tan2-c	-1.03242	4.68141	0.000359786	0.000314623	0.00707568	0.000927604	0.00120804	3.81734e-05	0.000582449	0.0135689
1	2	8971	tan1-b	tan2-c	tan1-b.tan2-c	-0.876904	5.82117	0.000388299	0.000925268	0.00988006	0.0019415	0.00446544	0.000665277	0.00166738	0.011045
1	2	8974	tan1-b	tan2-c	tan1-b.tan2-c	0.788377	5.93692	0.000323583	0.00039998	0.00778756	0.00189835	0.00157477	0.00655794	0.000711882	0.01523
1	2	8982	tan1-b	tan2-c	tan1-b.tan2-c	-1.5237	7.25283	0.000668738	0.00150155	0.0115843	0.00342998	0.00263181	0.00149139	0.000215722	0.0130943
1	2	8983	tan1-b	tan2-c	tan1-b.tan2-c	-1.2516	5.18425	0.000251154	0.000160537	0.00588921	0.000638858	0.00252395	0.000401946	0.000244786	0.0113901
1	2	8985	tan1-b	tan2-c	tan1-b.tan2-c	-1.60515	8.37846	0.000203976	2.87675e-05	0.00468116	0.000774351	0.00323583	0.00386142	0.000166848	0.00873673
1	2	8995	tan1-b	tan2-c	tan1-b.tan2-c	-1.73647	7.46653	0.000466446	3.12187e-05	0.0062775	0.00186239	0.00112175	0.00208805	0.000426576	0.0133316
1	2	8998	tan1-b	tan2-c	tan1-b.tan2-c	-0.304965	7.12431	0.000291994	2.59939e-05	0.00966434	0.000880462	0.00189835	0.00040508	0.00189835	0.0265122
1	2	9001	tan1-b	tan2-c	tan1-b.tan2-c	-1.01287	6.50325	0.000517732	0.000348304	0.00886617	0.00474588	0.0013159	0.00129656	0.00034492	0.00990163
1	2	9010	tan1-b	tan2-c	tan1-b.tan2-c	-0.0763844	6.22275	0.000528209	0.000530784	0.0118647	0.00539305	0.00159634	0.000205347	0.000517732	0.00940547
1	2	9013	tan1-b	tan2-c	tan1-b.tan2-c	-1.88388	6.18325	0.000143324	0.00088294	0.00858573	0.00250507	0.00161791	8.51161e-05	0.000625593	0.00888774
1	2	9015	tan1-b	tan2-c	tan1-b.tan2-c	-0.629066	6.03308	0.000510072	0.00017629	0.00873673	0.00347312	0.00258866	0.0038747	0.00120804	0.0133532
1	2	9018	tan1-b	tan2-c	tan1-b.tan2-c	-1.04145	6.66876	0.000204615	0.000711882	0.00845629	0.00262293	0.00351627	0.00280438	0.00146691	0.0101389
1	2	9019	tan1-b	tan2-c	tan1-b.tan2-c	-1.3262	6.64773	0.000732756	0.0028473	0.00918975	0.00765426	0.00235137	0.00319847	0.000517732	0.0133532
1	2	9033	tan1-b	tan2-c	tan1-b.tan2-c	-1.0381	7.33667	0.000591576	0.000285608	0.0104841	0.00647165	0.00330054	0.00184262	0.000884459	0.0190482
1	2	9039	tan1-b	tan2-c	tan1-b.tan2-c	-0.606747	5.79921	0.000560877	0.000270321	0.00841315	0.00125666	0.000970748	0.00571519	0.000302011	0.013461
1	2	9041	tan1-b	tan2-c	tan1-b.tan2-c	-0.727672	6.63495	0.000385229	0.000424706	0.00877988	0.0024808	0.00103546	0.00338245	0.00114154	0.0179481
1	2	9053	tan1-b	tan2-c	tan1-b.tan2-c	0.649058	8.82946	0.000715539	0.000304145	0.0122099	0.00407714	0.00222193	0.000876893	0.000180767	0.0160497
1	2	9152	tan1-b	tan2-c	tan1-b.tan2-c	-1.21284	5.88696	0.00166106	0.00528518	0.020623	0.00972905	0.00265338	0.004034	0.00116118	0.00759341
1	2	9153	tan1-b	tan2-c	tan1-b.tan2-c	-1.02853	5.28907	0.00077623	0.00169738	0.0124687	0.0101389	0.00299853	0.000298156	0.000517732	0.0133532
1	2	9154	tan1-b	tan2-c	tan1-b.tan2-c	-1.04822	6.30318	0.00101389	0.00168691	0.0166537	0.0102899	0.00127276	9.60122e-05	0.000409246	0.0143239
1	2	9155	tan1-b	tan2-c	tan1-b.tan2-c	-1.62464	4.77535	0.000188561	0.000538056	0.00962119	0.00531644	0.000755026	0.00017277	0.000388299	0.00947019
1	2	9170	tan1-b	tan2-c	tan1-b.tan2-c	0.67717	6.30005	0.000466573	0.000341888	0.0131375	0.00226508	0.000862887	0.000567639	0.000323583	0.0168479
1	2	9176	tan1-b	tan2-c	tan1-b.tan2-c	-1.43768	5.50999	0.000474588	0.000294045	0.0100095	0.00427129	0.00386142	0.00386142	0.00181206	0.00912503
1	2	9184	tan1-b	tan2-c	tan1-b.tan2-c	-0.899968	5.87022	0.000474588	0.000306564	0.00949176	0.00226508	0.00332212	0.000609834	0.000413053	0.00845629
1	2	9185	tan1-b	tan2-c	tan1-b.tan2-c	-0.95164	6.60203	0.000949176	0.00465959	0.0160066	0.0193718	0.000716878	0.000270671	0.000257389	0.0116921
1	2	9190	tan1-b	tan2-c	tan1-b.tan2-c	-0.845282	5.39572	0.000150805	3.68558e-05	0.0057382	0.000347267	0.0020925	0.00408274	0.000841315	0.0116058
1	2	9199	tan1-b	tan2-c	tan1-b.tan2-c	-1.32528	6.43167	0.00105704	0.00644524	0.0111097	0.0152333	0.00241608	0.00293756	0.000409871	0.00990163
1	2	9200	tan1-b	tan2-c	tan1-b.tan2-c	0.0154048	4.14964	0.0017042	0.00306325	0.0170636	0.0198896	0.00142376	0.00478761	0.000443212	0.0135689
1	2	9201	tan1-b	tan2-c	tan1-b.tan2-c	-0.02842	4.22279	0.000604021	2.32457e-05	0.00625593	0.00151793	0.0011649	3.44102e-05	0.000733454	0.0135689
1	2	9202	tan1-b	tan2-c	tan1-b.tan2-c	-1.19346	5.06547	0.00207093	0.00236978	0.0159203	0.0118863	0.00312797	3.68362e-05	0.000430266	0.012555
1	2	9208	tan1-b	tan2-c	tan1-b.tan2-c	-0.923011	6.49013	3.91473e-05	0.00133748	0.00714039	0.00172577	0.00304168	4.47325e-05	0.000359042	0.0146691
1	2	9222	tan1-b	tan2-c	tan1-b.tan2-c	-0.691305	7.35166	0.000439859	0.000115622	0.00780913	0.000322048	0.00390456	0.00373199	0.00252395	0.00981534
1	2	9223	tan1-b	tan2-c	tan1-b.tan2-c	-1.46121	6.01402	0.00076069	0.00154045	0.00940547	0.00153162	0.00256709	0.00039587	0.000906032	0.0147769
1	2	9229	tan1-b	tan2-c	tan1-b.tan2-c	-1.76389	5.74736	0.000265648	0.000463317	0.00476745	0.000482022	0.00289067	0.000183423	0.000604021	0.0117784
1	2	9230	tan1-b	tan2-c	tan1-b.tan2-c	-1.34714	5.78821	0.000197713	5.38527e-05	0.00383985	0.000247823	0.00222193	0.00116789	0.000711882	0.017495
1	2	9231	tan1-b	tan2-c	tan1-b.tan2-c	-0.942509	5.77937	0.000258866	0.000567674	0.00647165	0.00120804	0.00172577	0.000308364	0.000386925	0.0113685
1	2	9237	tan1-b	tan2-c	tan1-b.tan2-c	-0.599625	6.13701	0.000329851	0.000494627	0.00547933	0.00099232	0.00485374	0.00267128	0.0017042	0.00890931
1	2	9242	tan1-b	tan2-c	tan1-b.tan2-c	-1.45691	6.05746	0.00044375	0.000134781	0.00416343	0.00179049	0.00163949	0.004034	0.0017042	0.0107861
1	2	9244	tan1-b	tan2-c	tan1-b.tan2-c	-0.749866	6.79136	0.000458319	2.56671e-05	0.00985849	0.00455173	0.00110018	3.22998e-05	0.000285261	0.0110881
1	2	9257	tan1-b	tan2-c	tan1-b.tan2-c	-0.7538	5.62032	0.00133988	0.00916282	0.0105488	0.0055965	0.00138062	1.79549e-05	0.00110018	0.0158771
1	2	9260	tan1-b	tan2-c	tan1-b.tan2-c	-0.710941	5.94732	7.07756e-05	2.35372e-05	0.00500475	0.000361054	0.00297696	0.000637998	0.00061372	0.0162223
1	2	9264	tan1-b	tan2-c	tan1-b.tan2-c	-1.42824	5.49877	0.000647165	0.000887108	0.0100742	0.00256709	0.00153162	0.000184261	0.000326165	0.0119078

## Sheet: Dataset S5_random-selected_RILs
accessionID	TannonGenoType
9031	Tan1.Tan2
8893	Tan1.Tan2
8785	Tan1.Tan2
8846	Tan1.Tan2
9017	Tan1.Tan2
9056	Tan1.Tan2
8784	Tan1.Tan2
9234	Tan1.Tan2
9248	Tan1.Tan2
8779	Tan1.Tan2
8953	Tan1.Tan2
9163	Tan1.Tan2
8987	Tan1.Tan2
9175	Tan1.Tan2
8877	Tan1.Tan2
9258	Tan1.Tan2
8856	Tan1.Tan2
8799	Tan1.Tan2
8915	Tan1.Tan2
8994	Tan1.Tan2
9023	Tan1.Tan2
9216	Tan1.Tan2
9252	Tan1.Tan2
9212	Tan1.Tan2
9000	Tan1.Tan2
9226	Tan1.Tan2
8989	Tan1.Tan2
9052	Tan1.Tan2
8851	Tan1.Tan2
9167	Tan1.Tan2
8881	Tan1.Tan2
8997	Tan1.Tan2
9211	Tan1.Tan2
8897	Tan1.Tan2
8823	Tan1.Tan2
8808	Tan1.Tan2
9144	Tan1.Tan2
8875	Tan1.Tan2
8922	Tan1.Tan2
8815	Tan1.Tan2
8853	Tan1.Tan2
9209	Tan1.tan2-c
8961	Tan1.tan2-c
8885	Tan1.tan2-c
8878	Tan1.tan2-c
9270	Tan1.tan2-c
8919	Tan1.tan2-c
9207	Tan1.tan2-c
9214	Tan1.tan2-c
9253	Tan1.tan2-c
9002	Tan1.tan2-c
8913	Tan1.tan2-c
9035	Tan1.tan2-c
8937	Tan1.tan2-c
9008	Tan1.tan2-c
8835	Tan1.tan2-c
8844	tan1-b.Tan2
9181	tan1-b.Tan2
9147	tan1-b.Tan2
8992	tan1-b.Tan2
8874	tan1-b.Tan2
9043	tan1-b.Tan2
8888	tan1-b.Tan2
8964	tan1-b.Tan2
9180	tan1-b.Tan2
8820	tan1-b.Tan2
8876	tan1-b.Tan2
9256	tan1-b.Tan2
8765	tan1-b.Tan2
9238	tan1-b.Tan2
8908	tan1-b.Tan2
9152	tan1-b.tan2-c
8858	tan1-b.tan2-c
8924	tan1-b.tan2-c
8948	tan1-b.tan2-c
8898	tan1-b.tan2-c
8822	tan1-b.tan2-c
8959	tan1-b.tan2-c
9041	tan1-b.tan2-c
8772	tan1-b.tan2-c
9053	tan1-b.tan2-c
9039	tan1-b.tan2-c
9033	tan1-b.tan2-c
9190	tan1-b.tan2-c
8985	tan1-b.tan2-c
9260	tan1-b.tan2-c
